# Supplementary material for: Enantioselective direct Mannich-type reactions of 2-benzylpyridine N-oxides catalyzed by chiral bis(guanidino)iminophosphorane organosuperbase
Source: Royal Society of Chemistry journal article supplement (doi:10.1039/c8sc00808f), 2018-01-01
Supplement: c8sc00808f1.pdf [file c8sc00808f1.pdf]

# Electronic Supplementary Information

## Enantioselective Direct Mannich-Type Reactions of 2-Benzylpyridine *N*-Oxides Catalyzed by Chiral Bis(guanidino)iminophosphorane Organosuperbase

*Qiupeng Hu, Azusa Kondoh, and Masahiro Terada\**

### Table of Contents

|                                                                                          |     |
|------------------------------------------------------------------------------------------|-----|
| 1. General information .....                                                             | S2  |
| 2. The details for optimization of reaction conditions.....                              | S3  |
| 3. Synthesis of 2-benzylpyridine and their derivatives <b>S2-S14</b> .....               | S5  |
| 3.1 Typical procedure for the substituted 2-benzylpyridine ( <b>S2-S6, S8-S13</b> )..... | S5  |
| 3.2 Synthesis of 2-(4-bromobenzyl)pyridine <b>S7</b> .....                               | S5  |
| 3.3 Synthesis of 2-benzyl-4-methoxypyridine <b>S14</b> .....                             | S6  |
| 4. Synthesis of 2-benzylpyridine <i>N</i> -oxide and their derivatives <b>2a-n</b> ..... | S9  |
| 4.1 Typical procedure for the substituted 2-benzylpyridine <i>N</i> -oxides.....         | S9  |
| 5. Catalytic enantioselective direct Mannich-type reactions.....                         | S13 |
| 5.1 Typical procedure.....                                                               | S13 |
| 6. Catalytic reaction in larger scale and reduction of pyridine <i>N</i> -oxide .....    | S24 |
| 7. HPLC Charts.....                                                                      | S26 |
| 8. NMR Spectra .....                                                                     | S49 |
| 9. Referances.....                                                                       | S96 |

## 1. General information

Unless otherwise noted, the reactions were carried out with dried glassware under argon or nitrogen atmosphere. Analytical thin layer chromatography (TLC) was performed on Merck precoated TLC plates (silica gel 60 GF254, 0.25 mm). Flash column chromatography was performed on silica gel 60N (spherical, neutral, 40-50  $\mu$ m; Kanto Chemical Co., Inc.).  $^1\text{H}$  NMR spectra were recorded on a JEOL JNM-ECA600 (600 MHz) spectrometer. Chemical shifts are reported in ppm from the solvent resonance or tetramethylsilane (TMS) as the internal standard. Data are reported as follows: chemical shift, integration, multiplicity (s = singlet, d = doublet, t = triplet, q = quartet, m = multiplet, br = broad) and coupling constants (Hz).  $^{13}\text{C}$  NMR spectra were recorded on a JEOL JNM-ECA600 (150 MHz) spectrometer with complete proton decoupling. Chemical shifts are reported in ppm from the solvent resonance as the internal standard. Optical rotations were measured on a Jasco P-1020 digital polarimeter with a sodium lamp and reported as follows;  $[\alpha]_D^{25}$  (c = g/100 mL, solvent). HPLC was performed on JASCO HPLC systems. High resolution mass spectra analysis was performed on a Bruker Daltonics solariX 9.4T FT-ICR-MS spectrometer at the Research and Analytical Center for Giant Molecules, Graduate School of Science, Tohoku University.

## 2. The details for optimization of reaction conditions

**Table S1.** Details for screening of PG of imines.<sup>a</sup>

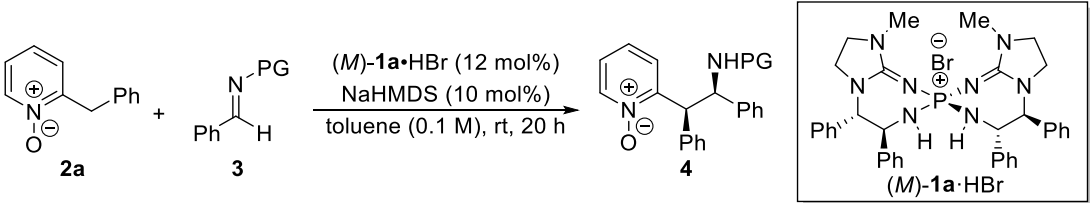

| Entry | Solv.   | PG                   | Yield [%] <sup>b</sup> | <i>syn/anti</i> <sup>c</sup> | ee [%] <sup>c</sup> |
|-------|---------|----------------------|------------------------|------------------------------|---------------------|
| 1     | toluene | Boc                  | 83                     | 78:22                        | 89/5                |
| 2     | toluene | Alloc                | 89                     | 56:44                        | 67/17               |
| 3     | toluene | Bz                   | 46                     | 60:40                        | 23/38               |
| 4     | toluene | Ts                   | NR                     | -                            | -                   |
| 5     | toluene | Ph <sub>2</sub> P(O) | 73                     | 85:15                        | 2/0                 |

<sup>a</sup> Reaction conditions: **2a** (0.10 mmol), **3** (0.11 mmol), (*M*)-**1a**·HBr (0.012 mmol), NaN(SiMe<sub>3</sub>)<sub>2</sub> (0.010 mmol), toluene (1.0 mL), rt, 20 h. <sup>b</sup> The combined yield of the diastereomeric mixtures was indicated. <sup>c</sup> The dr and ee values were determined by chiral HPLC analysis. Boc = *tert*-butyloxycarbonyl; Alloc = allyloxycarbonyl; Bz = benzoyl; Ts = tosyl.

**Table S2.** Details for screening of alkoxy carbonyl groups of imines.<sup>a</sup>

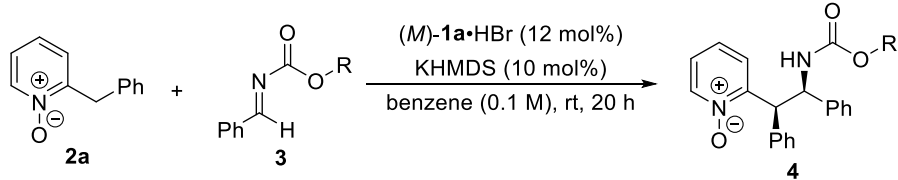

| Entry | R                      | Yield [%] <sup>b</sup> | <i>syn/anti</i> <sup>c</sup> | ee [%] <sup>c</sup> |
|-------|------------------------|------------------------|------------------------------|---------------------|
| 1     | Me                     | 71                     | 59:41                        | 87/13               |
| 2     | Et                     | 79                     | 62:38                        | 73/16               |
| 3     | <i>t</i> Bu            | 83                     | 83:17                        | 91/10               |
| 4     | C(Et) <sub>3</sub>     | 80                     | 83:17                        | 89/8                |
| 5     | C(Et)(Me) <sub>2</sub> | 57                     | 69:31                        | 88/27               |
| 6     | Ad                     | 63                     | 81:19                        | 88/11               |

<sup>a</sup> Reaction conditions: **2a** (0.1 mmol), **3** (0.11 mmol), (*M*)-**1a**·HBr (0.012 mmol), KN(SiMe<sub>3</sub>)<sub>2</sub> (0.010 mmol), benzene (1.0 mL), rt, 20 h. <sup>b</sup> The combined yield of the diastereomeric mixtures was indicated. <sup>c</sup> The dr and ee values were determined by chiral HPLC analysis. Ad = adamantyl.

**Table S3.** Details for screening of other effects.<sup>a</sup>

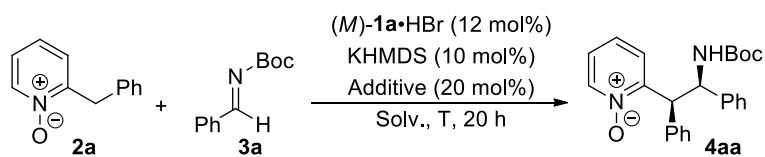

| Entry | Additive   | Solv.             | Conc. (x M) | T [°C] | Yield [%] <sup>b</sup> | <i>syn/anti</i> <sup>c</sup> | ee [%] <sup>c</sup> |
|-------|------------|-------------------|-------------|--------|------------------------|------------------------------|---------------------|
| 1     | 18-crown-6 | benzene           | 0.1         | rt     | 84                     | 69:31                        | 67/0                |
| 2     | KBr        | benzene           | 0.1         | rt     | 87                     | 81:19                        | 90/11               |
| 3     | 4Å MS      | benzene           | 0.1         | rt     | 83                     | 82:18                        | 89/12               |
| 4     | -          | benzene           | 0.25        | rt     | 91                     | 78:22                        | 87/11               |
| 5     | -          | benzene/tol (2:3) | 0.1         | 0      | 44                     | 76:24                        | 83/2                |
| 6     | -          | benzene/tol (2:3) | 0.2         | 0      | 90                     | 82:18                        | 86/14               |
| 7     | -          | benzene/tol (2:3) | 0.2         | -10    | trace                  |                              |                     |

<sup>a</sup> Reaction conditions: **2a** (0.1 mmol), **3a** (0.11 mmol), *(M)*-**1a**·HBr (0.012 mmol), KN(SiMe<sub>3</sub>)<sub>2</sub> (0.010 mmol), solvent, 20 h. <sup>b</sup> The combined yield of the diastereomeric mixtures was indicated. <sup>c</sup> The dr and ee values were determined by chiral HPLC analysis.

### 3. Synthesis of 2-benzylpyridine and their derivatives S2-S14

#### 3.1 Typical procedure for the substituted 2-benzylpyridine (S2-S6, S8-S13)

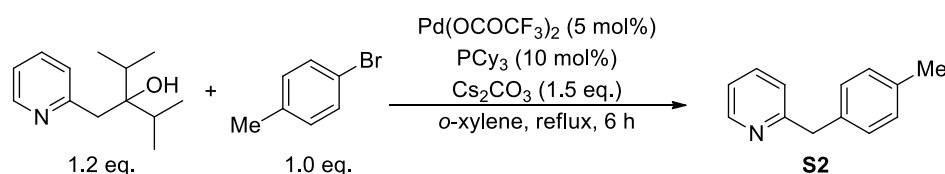

The synthesis of substituted 2-benzylpyridines (except **S7** and **S14**) was according to the method described in the literature.<sup>1</sup>

To a 20 mL two-necked reaction flask equipped with a condenser were added 2,4-dimethyl-3-((6-methylpyridin-2-yl)methyl)pentan-3-ol (0.62 g, 3.0 mmol), 4-bromotoluene (0.43 g, 2.5 mmol), Pd(OCOCF<sub>3</sub>)<sub>2</sub> (42.1 mg, 0.12 mmol), tricyclohexylphosphine (70.0 mg, 0.24 mmol), Cs<sub>2</sub>CO<sub>3</sub> (1.22 g, 3.8 mmol). The system was evacuated and filled with argon gas, and then *o*-xylene (6.0 mL) was added. The resulting mixture was refluxed for 6 h. After cooled to room temperature, H<sub>2</sub>O (5.0 mL) was added, and the resulting solution was extracted with ethyl acetate (20 mL × 3). The combined organic layer was dried over sodium sulfate, and concentrated in vacuo. The residue was purified by flash chromatography (hexane/ethyl acetate = 4:1 as the eluent) to provide the desired product **S2** in 77% yield.

#### 3.2 Synthesis of 2-(4-bromobenzyl)pyridine S7

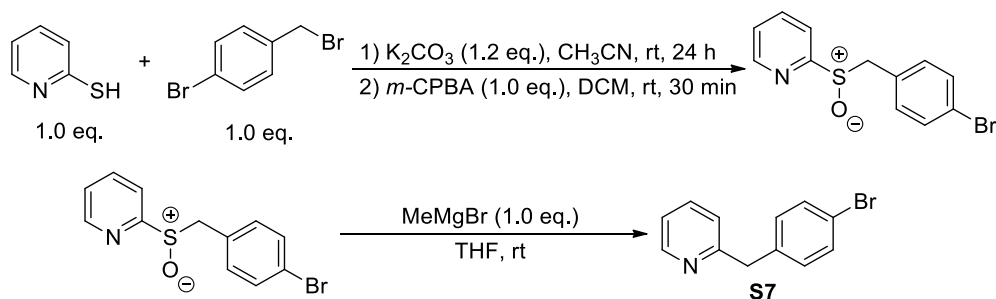

The synthesis of 2-(4-bromobenzyl)pyridine **S7** was according to the method described in the literature.<sup>2</sup>

To a solution of 2-mercaptopyridine (0.39 g, 3.5 mmol) in acetonitrile (35 mL) were added potassium carbonate (0.58 g, 4.2 mmol) and 4-bromobenzyl bromide (0.88 g, 3.5 mmol). After stirring for 24 h, 40 mL H<sub>2</sub>O was added, and the mixture was extracted with CH<sub>2</sub>Cl<sub>2</sub> (20 mL × 3). The combined organic layer was dried over magnesium sulfate and concentrated to give the crude sulfide. The crude sulfide was dissolved in 35 mL CH<sub>2</sub>Cl<sub>2</sub>. To the solution was added *m*-CPBA (77 wt%, 0.79 g, 3.5 mmol). After stirred for 30 min, 10 mL aq. NaOH (1 M) was added, the phases

were separated, and the aqueous phase was extracted with  $\text{CH}_2\text{Cl}_2$  (10 mL  $\times$  2). The combined organic phase was dried over magnesium sulfate and concentrated in vacuo. The residue was purified by flash chromatography (hexane/ethyl acetate = 2:1 as the eluent) to afford the sulfoxide. To a solution of the sulfoxide (3.5 mmol) in 15 mL THF was added methylmagnesium bromide solution (3.0 M in THF, 3.9 mmol) dropwise at room temperature. Then the reaction mixture was stirred for 1 h. The reaction was quenched by adding 10 mL saturated aq.  $\text{NH}_4\text{Cl}$  slowly, and the mixture was extracted with ethyl acetate (20 mL  $\times$  3). The combined organic layer was dried over magnesium sulfate and concentrated in vacuo. The residue was purified by flash chromatography (hexane/ethyl acetate = 4:1 as the eluent) to provide **S7**.

### 3.3 Synthesis of 2-benzyl-4-methoxypyridine **S14**

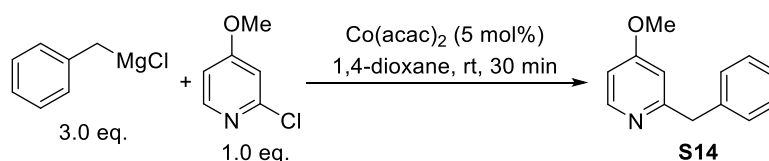

2-Benzyl-4-methoxypyridine **S14** was synthesized according to the method described in the literature.<sup>3</sup>

To a 100 mL two-necked flask were added anhydrous cobalt(II) acetylacetonate (85.7 mg, 0.33 mmol) and 25 mL anhydrous 1,4-dioxane under argon atmosphere. After cooled to 0 °C, benzylmagnesium chloride (1.0 M ether solution, 10 mL, 10.0 mmol) was added dropwise, then the solution was warmed to room temperature and stirred for 5 min. 2-Chloro-4-methoxypyridine (0.38 mL, 3.3 mmol) was added dropwise to the solution. After stirred for 30 min, the reaction mixture was poured into 30 mL  $\text{H}_2\text{O}$ . The mixture was extracted with ethyl acetate (20 mL  $\times$  3). The combined organic layer was dried over sodium sulfate, and concentrated in vacuo. The residue was purified by flash chromatography (hexane/ethyl acetate = 4:1 as the eluent) to provide desired product **S14**.

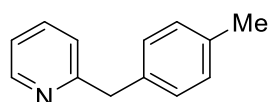

**2-(4-Methylbenzyl)pyridine (S2)**<sup>2</sup> 77% yield;  $^1\text{H NMR}$  (600 MHz,  $\text{CDCl}_3$ )  $\delta$  8.57-8.52 (m, 1H), 7.57 (td,  $J = 7.7, 1.8$  Hz, 1H), 7.17 (d,  $J = 8.0$  Hz, 2H), 7.12 (d,  $J = 7.6$  Hz, 2H), 7.10 (t,  $J = 3.7$  Hz, 2H), 4.13 (s, 2H), 2.33 (s, 3H).

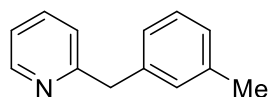

**2-(3-Methylbenzyl)pyridine (S3)**<sup>2</sup> 66% yield;  $^1\text{H NMR}$  (600 MHz,  $\text{CDCl}_3$ )  $\delta$  8.56 (d,  $J = 4.9$  Hz, 1H), 7.55 (td,  $J = 7.7, 1.8$  Hz, 1H), 7.22-7.16 (m, 4H), 7.11 (dd,  $J = 7.2, 5.1$  Hz, 1H), 6.96 (d,  $J = 7.8$  Hz, 1H), 4.19 (s, 2H), 2.26 (s, 3H).

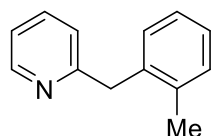

**2-(2-Methylbenzyl)pyridine (S4)**<sup>1</sup> 96% yield; <sup>1</sup>H NMR (600 MHz, CDCl<sub>3</sub>) δ 8.56 (ddd, *J* = 4.8, 1.6, 0.8 Hz, 1H), 7.55 (td, *J* = 7.7, 1.8 Hz, 1H), 7.21-7.17 (m, 4H), 7.11 (ddd, *J* = 7.5, 4.7, 0.7 Hz, 1H), 6.96 (d, *J* = 7.9 Hz, 1H), 4.19 (s, 2H), 2.26 (s, 3H).

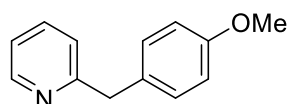

**2-(4-Methoxybenzyl)pyridine (S5)**<sup>1</sup> 78% yield; <sup>1</sup>H NMR (600 MHz, CDCl<sub>3</sub>) δ 8.53 (d, *J* = 4.5 Hz, 1H), 7.55 (td, *J* = 7.6, 1.8 Hz, 1H), 7.23-7.14 (m, 2H), 7.13-7.01 (m, 2H), 6.91-6.78 (m, 2H), 4.09 (s, 2H), 3.77 (s, 3H).

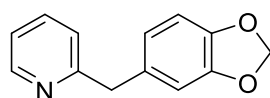

**2-(Benzo[d][1,3]dioxol-5-ylmethyl)pyridine (S6)**<sup>4</sup> 75% yield; <sup>1</sup>H NMR (600 MHz, CDCl<sub>3</sub>) δ 8.52 (dd, *J* = 5.4, 1.8 Hz, 1H), 7.55 (td, *J* = 7.7, 1.9 Hz, 1H), 7.10-7.06 (m, 2H), 6.74-6.69 (m, 3H), 5.88 (s, 2H), 4.04 (s, 2H).

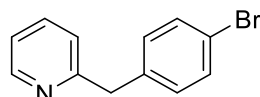

**2-(4-Bromobenzyl)pyridine (S7)**<sup>2</sup> 57% yield; <sup>1</sup>H NMR (600 MHz, CDCl<sub>3</sub>) δ 8.55 (d, *J* = 4.8 Hz, 1H), 7.59 (td, *J* = 7.7, 1.8 Hz, 1H), 7.42 (d, *J* = 8.4 Hz, 2H), 7.14 (d, *J* = 8.3 Hz, 2H), 7.13 (dd, *J* = 6.3, 3.9 Hz, 1H), 7.10 (d, *J* = 7.8 Hz, 1H), 4.11 (s, 2H).

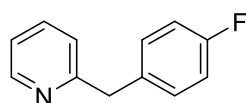

**2-(4-Fluorobenzyl)pyridine (S8)**<sup>2</sup> 67% yield; <sup>1</sup>H NMR (600 MHz, CDCl<sub>3</sub>) δ 8.53 (ddd, *J* = 4.8, 1.7, 0.9 Hz, 1H), 7.55 (td, *J* = 7.7, 1.9 Hz, 1H), 7.22-7.17 (m, 2H), 7.10-7.06 (m, 2H), 6.99-6.93 (m, 2H), 4.10 (s, 2H).

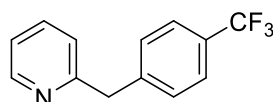

**2-(4-(Trifluoromethyl)benzyl)pyridine (S9)**<sup>1</sup> 74% yield; <sup>1</sup>H NMR (600 MHz, CDCl<sub>3</sub>) δ 8.55 (ddd, *J* = 2.7, 2.0, 1.1 Hz, 1H), 7.59 (td, *J* = 7.7, 1.8 Hz, 1H), 7.54 (d, *J* = 8.1 Hz, 2H), 7.37 (d, *J* = 8.0 Hz, 2H), 7.13 (ddd, *J* = 7.7, 4.9, 0.9 Hz, 1H), 7.11 (d, *J* = 7.8 Hz, 1H), 4.19 (s, 2H).

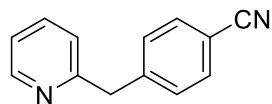

**2-(4-Cyanobenzyl)pyridine (S10)**<sup>1</sup> 89% yield; <sup>1</sup>H NMR (600 MHz, CDCl<sub>3</sub>) δ 8.53 (d, *J* = 4.0 Hz, 1H), 7.60 (td, *J* = 7.6, 1.7 Hz, 1H), 7.56 (d, *J* = 8.0 Hz, 2H), 7.35 (d, *J* = 7.9 Hz, 2H), 7.20-7.04 (m, 2H), 4.17 (s, 2H).

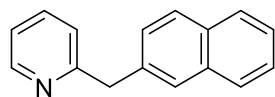

**2-(Naphthalen-2-ylmethyl)pyridine (S11)**<sup>4</sup> 91% yield; <sup>1</sup>H NMR (600 MHz, CDCl<sub>3</sub>) δ 8.59-8.54 (m, 1H), 7.82-7.74 (m, 3H), 7.72 (s, 1H), 7.56 (td, *J* = 7.7, 1.8 Hz, 1H), 7.47-7.40 (m, 2H), 7.38 (dd, *J* = 8.4, 1.7 Hz, 1H), 7.13 (d, *J* = 7.9 Hz, 1H), 7.12-7.09 (m, 1H), 4.32 (s, 2H).

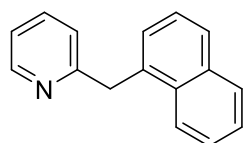

**2-(Naphthalen-1-ylmethyl)pyridine (S12)**<sup>4</sup> 81% yield; <sup>1</sup>H NMR (600 MHz, CDCl<sub>3</sub>) δ 8.60 (dd, *J* = 4.9, 0.8 Hz, 1H), 8.06-8.00 (m, 1H), 7.90-7.84 (m, 1H), 7.80 (d, *J* = 8.2 Hz, 1H), 7.51-7.43 (m, 4H), 7.42 (d, *J* = 6.7 Hz, 1H), 7.10 (dd, *J* = 7.2, 5.1 Hz, 1H), 6.97 (d, *J* = 7.9 Hz, 1H), 4.65 (s, 2H).

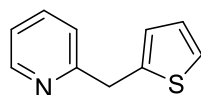

**2-(Thiophen-2-ylmethyl)pyridine (S13)**<sup>5</sup> 41% yield; <sup>1</sup>H NMR (600 MHz, CDCl<sub>3</sub>) δ 8.56 (d, *J* = 4.8 Hz, 1H), 7.61 (td, *J* = 7.7, 1.8 Hz, 1H), 7.19 (d, *J* = 7.8 Hz, 1H), 7.17 (dd, *J* = 5.1, 1.1 Hz, 1H), 7.14 (dd, *J* = 7.2, 4.8 Hz, 1H), 6.94 (dd, *J* = 5.1, 3.5 Hz, 1H), 6.90-6.88 (m, 1H), 4.34 (s, 2H).

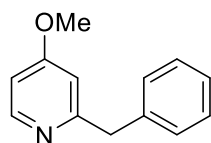

**2-Benzyl-4-methoxypyridine (S14)**<sup>6</sup> 86% yield; <sup>1</sup>H NMR (600 MHz, CDCl<sub>3</sub>) δ 8.35 (t, *J* = 6.4 Hz, 1H), 7.30-7.24 (m, 4H), 7.21-7.18 (m, 1H), 6.63 (dd, *J* = 5.8, 2.5 Hz, 1H), 6.60 (d, *J* = 2.4 Hz, 1H), 4.09 (s, 2H), 3.74 (s, 3H).



## 4. Synthesis of 2-benzylpyridine *N*-oxide and their derivatives 2a-n

### 4.1 Typical procedure for the substituted 2-benzylpyridine *N*-oxides

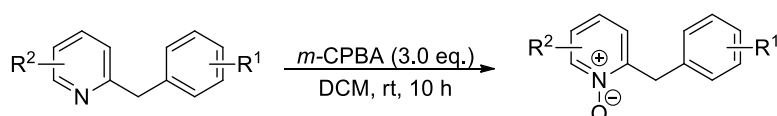

To a 50 mL flask were added 2-benzylpyridine (2.0 mmol, 1.0 eq.) and 20 mL CH<sub>2</sub>Cl<sub>2</sub>. The solution was cooled to 0 °C, and *meta*-chloroperoxybenzoic acid (6.0 mmol, 3.0 eq) was added portionwise. After that, the mixture was warmed to room temperature and stirred for 6 h. The reaction mixture was quenched with potassium carbonate (1.24 g, 4.5 eq.) and stirred for additional 10 min. The mixture was filtrated through a celite pad. The filtrate was concentrated under reduced pressure. The residue was purified by flash chromatography (hexane/ethyl acetate/methanol = 3:6:1 as the eluent) to afford the desired product.

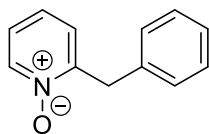

**2-Benzylpyridine *N*-oxide (2a)**<sup>7</sup> 60% yield; <sup>1</sup>H NMR (600 MHz, CDCl<sub>3</sub>) δ 8.38-8.23 (m, 1H), 7.36 (t, *J* = 7.6 Hz, 2H), 7.29 (t, *J* = 8.6 Hz, 3H), 7.21-7.10 (m, 2H), 7.00-6.90 (m, 1H), 4.27 (s, 2H); <sup>13</sup>C NMR (150 MHz, CDCl<sub>3</sub>) δ 152.1, 139.5, 136.4, 129.8, 128.9, 127.1, 125.9, 125.5, 123.6, 36.6.

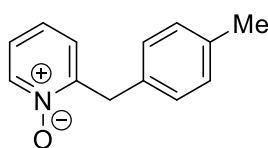

**2-(4-Methylbenzyl)pyridine *N*-oxide (2b)**<sup>7</sup> 81% yield; <sup>1</sup>H NMR (600 MHz, CDCl<sub>3</sub>) δ 8.33-8.24 (m, 1H), 7.17 (s, 4H), 7.16-7.12 (m, 2H), 6.96-6.92 (m, 1H), 4.23 (s, 2H), 2.36 (s, 3H); <sup>13</sup>C NMR (150 MHz, CDCl<sub>3</sub>) δ 152.2, 139.3, 136.6, 133.1, 129.6, 129.5, 125.7, 125.4, 123.4, 36.1, 21.1.

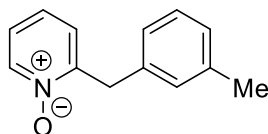

**2-(3-Methylbenzyl)pyridine *N*-oxide (2c)**<sup>8</sup> 75% yield; <sup>1</sup>H NMR (600 MHz, CDCl<sub>3</sub>) δ 8.29 (dd, *J* = 5.3, 2.4 Hz, 1H), 7.25 (t, *J* = 7.5 Hz, 1H), 7.19-7.13 (m, 2H), 7.13-7.06 (m, 3H), 6.98-6.92 (m, 1H), 4.23 (s, 2H), 2.35 (s, 3H), <sup>13</sup>C NMR (150 MHz, CDCl<sub>3</sub>) δ 152.1, 139.3, 138.5, 136.1, 130.4, 128.7, 127.8, 126.7, 125.8, 125.4, 123.4, 36.4, 21.4.

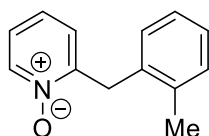

**2-(2-Methylbenzyl)pyridine *N*-oxide (2d)**<sup>7</sup> 84% yield; <sup>1</sup>H NMR (600 MHz, CDCl<sub>3</sub>) δ 8.33 (dd, *J* = 6.5, 0.9 Hz, 1H), 7.26-7.19 (m, 3H), 7.19-7.14 (m, 2H), 7.11 (td, *J* = 7.8, 1.1 Hz, 1H), 6.71 (dd, *J* = 7.8, 1.4 Hz, 1H), 4.25 (s, 2H), 2.20 (s, 3H); <sup>13</sup>C NMR (150 MHz, CDCl<sub>3</sub>) δ 151.2, 139.2, 137.1, 134.3, 130.51, 130.49, 127.4, 126.4, 125.5, 125.0, 123.3, 34.2, 19.2.

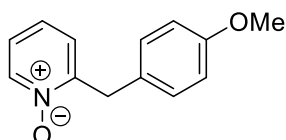

**2-(4-Methoxybenzyl)pyridine *N*-oxide (2e)**<sup>7</sup> 72% yield; <sup>1</sup>H NMR (600 MHz, CDCl<sub>3</sub>) δ 8.31-8.27 (m, 1H), 7.21 (d, *J* = 8.5 Hz, 2H), 7.17-7.10 (m, 2H), 6.98-6.93 (m, 1H), 6.92-6.87 (m, 2H), 4.21 (s, 2H), 3.82 (s, 3H); <sup>13</sup>C NMR (150 MHz, CDCl<sub>3</sub>) δ 158.7, 152.4, 139.4, 130.8, 128.1, 125.7, 125.4, 123.4, 114.3, 55.3, 35.7.

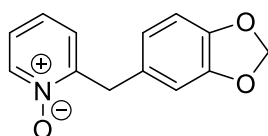

**2-(Benzo[*d*][1,3]dioxol-5-ylmethyl)pyridine *N*-oxide (2f)** 73% yield; <sup>1</sup>H NMR (600 MHz, CDCl<sub>3</sub>) δ 8.30-8.27 (m, 1H), 7.17-7.13 (m, 2H), 7.01-6.97 (m, 1H), 6.80 (d, *J* = 7.8 Hz, 1H), 6.78-6.73 (m, 2H), 5.96 (s, 2H), 4.18 (s, 2H); <sup>13</sup>C NMR (150 MHz, CDCl<sub>3</sub>) δ 152.0, 148.0, 146.6, 139.4, 129.8, 125.7, 125.4, 123.5, 122.8, 110.0, 108.6, 101.0, 36.2; IR (ATR): 3398, 2888, 1504, 1489, 1442, 1250, 1037 cm<sup>-1</sup>; HRMS (ESI) *m/z* calcd for C<sub>13</sub>H<sub>11</sub>NNaO<sub>3</sub> [M+Na]<sup>+</sup> 252.0631, found: 252.0631.

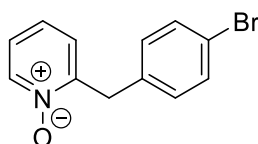

**2-(4-Bromobenzyl)pyridine *N*-oxide (2g)** 81% yield; <sup>1</sup>H NMR (600 MHz, CDCl<sub>3</sub>) δ 8.31-8.25 (m, 1H), 7.51-7.44 (m, 2H), 7.20-7.13 (m, 4H), 7.01-6.96 (m, 1H), 4.22 (s, 2H); <sup>13</sup>C NMR (150 MHz, CDCl<sub>3</sub>) δ 151.2, 139.5, 135.3, 131.9, 131., 125.8, 125.4, 123.8, 121.0, 36.0; IR (ATR): 3410, 3082, 1487, 1435, 1407, 1246, 1070, 1012, 913, 862 cm<sup>-1</sup>; HRMS (ESI) *m/z* calcd for C<sub>12</sub>H<sub>10</sub>BrNNaO [M+Na]<sup>+</sup> 285.9838, found: 285.9838.

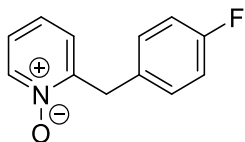

**2-(4-Fluorobenzyl)pyridine *N*-oxide (2h)**<sup>7</sup> 65% yield; <sup>1</sup>H NMR (600 MHz, CDCl<sub>3</sub>) δ 8.31-8.27 (m, 1H), 7.27 (m, 3H), 7.19-7.14 (m, 2H), 7.08-7.01 (m, 2H), 7.00-6.95 (m, 1H), 4.24 (s, 2H); <sup>13</sup>C NMR (150 MHz, CDCl<sub>3</sub>) δ 162.0 (d, *J*<sub>C-F</sub> = 245.5 Hz), 151.7, 139.5, 132.0 (d, *J*<sub>C-F</sub> = 2.6 Hz), 131.1 (d, *J*<sub>C-F</sub> = 8.2 Hz), 125.7, 125.4, 123.7, 115.7 (d, *J*<sub>C-F</sub> = 21.6 Hz), 35.8.

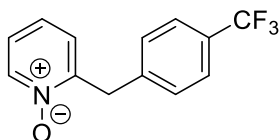

**2-(4-(Trifluoromethyl)benzyl)pyridine *N*-oxide (2i)**<sup>7</sup> 67% yield; <sup>1</sup>H NMR (600 MHz, CDCl<sub>3</sub>) δ 8.32-8.27 (m, 1H), 7.60 (d, *J* = 8.1 Hz, 2H), 7.42 (d, *J* = 8.0 Hz, 2H), 7.22-7.16 (m, 2H), 7.06-7.01 (m, 1H), 4.32 (s, 2H); <sup>13</sup>C NMR (150 MHz, CDCl<sub>3</sub>) δ 150.7, 140.5, 139.6, 129.8, 129.4 (q, *J*<sub>C-F</sub> = 32.2 Hz), 125.9, 125.7 (q, *J*<sub>C-F</sub> = 3.7 Hz), 125.5, 124.1 (q, *J*<sub>C-F</sub> = 270.5 Hz), 124.1, 36.4.

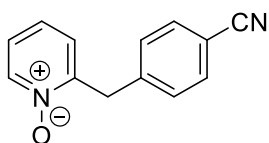

**2-(4-Cyanobenzyl)pyridine *N*-oxide (2j)**<sup>7</sup> 78% yield; <sup>1</sup>H NMR (600 MHz, CDCl<sub>3</sub>) δ 8.27 (dd, *J* = 4.9, 2.8 Hz, 1H), 7.62 (d, *J* = 8.2 Hz, 2H), 7.42 (d, *J* = 8.1 Hz, 2H), 7.23-7.18 (m, 2H), 7.11-7.07 (m, 1H), 4.31 (s, 2H); <sup>13</sup>C NMR (150 MHz, CDCl<sub>3</sub>) δ 149.9, 142.0, 139.7, 132.4, 130.1, 126.0, 125.5, 124.3, 118.7, 110.9, 36.7.

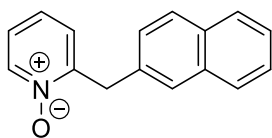

**2-(Naphthalen-2-ylmethyl)pyridine *N*-oxide (2k)**<sup>9</sup> 82% yield; <sup>1</sup>H NMR (600 MHz, CDCl<sub>3</sub>) δ 8.32 (dd, *J* = 6.4, 1.0 Hz, 1H), 7.87-7.83 (m, 2H), 7.81 (dd, *J* = 6.3, 2.9 Hz, 1H), 7.76 (s, 1H), 7.52-7.45 (m, 2H), 7.39 (dd, *J* = 8.4, 1.7 Hz, 1H), 7.18-7.15 (m, 1H), 7.12 (td, *J* = 7.6, 1.3 Hz, 1H), 6.96 (dd, *J* = 7.7, 1.8 Hz, 1H), 4.44 (s, 2H); <sup>13</sup>C NMR (150 MHz, CDCl<sub>3</sub>) δ 151.9, 139.4, 133.8, 133.6, 132.5, 128.6, 128.4, 127.8, 127.7, 127.6, 126.2, 125.9, 125.8, 125.5, 123.6, 36.6.

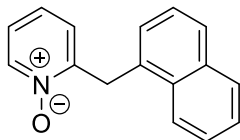

**2-(Naphthalen-1-ylmethyl)pyridine *N*-oxide (2l)**<sup>7</sup> 79% yield; <sup>1</sup>H NMR (600 MHz, CDCl<sub>3</sub>) δ 8.38 (dd, *J* = 6.4, 0.7 Hz, 1H), 7.91 (d, *J* = 8.1 Hz, 1H), 7.86 (d, *J* = 8.2 Hz, 1H), 7.77 (d, *J* = 8.5 Hz, 1H), 7.52-7.43 (m, 4H), 7.14 (td, *J* = 7.5, 2.0 Hz, 1H), 7.00 (td, *J* = 8.1, 1.2 Hz, 1H), 6.63 (dd, *J* = 8.0, 1.3 Hz, 1H), 4.72 (s, 2H); <sup>13</sup>C NMR (150 MHz, CDCl<sub>3</sub>) δ 151.5, 139.2, 134.0, 132.4, 132.1, 128.8, 128.5, 128.2, 126.5, 126.0, 125.7, 125.7, 125.5, 124.0, 124.0, 33.8.

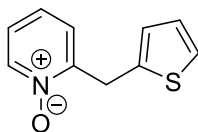

**2-(Thiophen-2-ylmethyl)pyridine *N*-oxide (2m)** 68% yield; <sup>1</sup>H NMR (600 MHz, CDCl<sub>3</sub>) δ 8.32-8.25 (m, 1H), 7.24 (dd, *J* = 4.9, 1.4 Hz, 1H), 7.19-7.15 (m, 2H), 7.13-7.09 (m, 1H), 7.02-6.97 (m, 2H), 4.47 (s, 2H); <sup>13</sup>C NMR (150 MHz, CDCl<sub>3</sub>) δ 150.9, 139.2, 137.6, 127.3, 127.1, 125.5, 125.4, 125.1, 123.8, 30.6; IR (ATR): 3388, 3076, 1489, 1436, 1240, 848, 768, 701 cm<sup>-1</sup>; HRMS (ESI) *m/z* calcd for C<sub>10</sub>H<sub>9</sub>NNaOS [M+Na]<sup>+</sup> 214.0297, found: 214.0297.

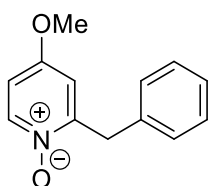

**2-Benzyl-4-methoxypyridine *N*-oxide (2n)** 79% yield; <sup>1</sup>H NMR (600 MHz, CDCl<sub>3</sub>) δ 8.21 (d, *J* = 7.2 Hz, 1H), 7.40-7.34 (m, 2H), 7.32-7.28 (m, 3H), 6.70 (dd, *J* = 7.2, 3.5 Hz, 1H), 6.43 (d, *J* = 3.4 Hz, 1H), 4.27 (s, 2H), 3.73 (s, 3H); <sup>13</sup>C NMR (150 MHz, CDCl<sub>3</sub>) δ 157.4, 152.8, 140.0, 136.2, 129.7, 128.9, 127.1, 111.3, 109.4, 55.8, 36.8; IR (ATR): 3379, 3062, 1632, 1560, 1485, 1467, 1433, 1302, 1214, 1160, 1032 cm<sup>-1</sup>; HRMS (ESI) *m/z* calcd for C<sub>13</sub>H<sub>13</sub>NNaO<sub>2</sub> [M+Na]<sup>+</sup> 238.0839, found: 238.0838.

## 5. Catalytic enantioselective direct Mannich-type reactions

### 5.1 Typical procedure

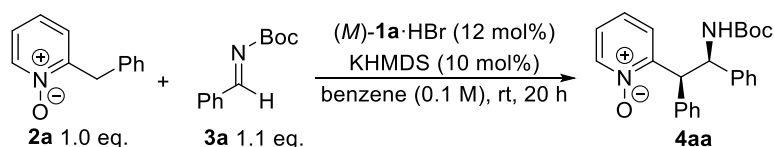

To a dried test tube was added (*M*)-**1a**·HBr (9.5 mg, 0.012 mmol), and then anhydrous benzene (1.0 mL) was added under argon atmosphere. A solution of KN(SiMe<sub>3</sub>)<sub>2</sub> in toluene (0.5 M, 20 μL, 0.010 mmol) was added to the suspension at room temperature. After stirring for ca. 1 min, 2-benzylpyridine *N*-oxide **2a** was added in one portion, and the mixture was stirred for 1 min. Then *N*-Boc imine **3a** was added to the solution. After that, the reaction mixture was stirred at room temperature for 20 h. The reaction was quenched with 1.0 mL saturated NH<sub>4</sub>Cl aq. and extracted with CH<sub>2</sub>Cl<sub>2</sub> (5.0 mL × 3). The combined organic phase was dried over sodium sulfate, and concentrated in vacuo. The residue was purified by flash chromatography (hexane/ethyl acetate/methanol = 3:9:1 as the eluent) to afford **4aa** in 83% yield with *syn/anti* = 83/17 and 91% ee. The diastereomers of **4aa** were reslurried in a mixed solvent of ethyl acetate 2.0 mL and hexane 1.0 mL for 2 h. After filtration, the major *syn*-isomer of **4aa** was obtained as a white solid in 54% yield with 93% ee.

All the characterization data of the mixture of diastereomers were described in this section. In the case of **4aa**, the NMR spectra of two diastereomers were given respectively.

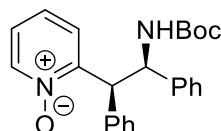

**2-((1*R*,2*R*)-2-((*tert*-Butoxycarbonyl)amino)-1,2-diphenylethyl)pyridine *N*-oxide (**4aa**)** 83% yield, 83/17 dr, 91% ee; **Major isomer:** <sup>1</sup>H NMR (600 MHz, CDCl<sub>3</sub>) δ 8.08 (d, *J* = 6.3 Hz, 1H), 7.45-7.36 (m, 3H), 7.34-7.27 (m, 4H), 7.25-7.21 (m, 3H), 7.19-7.15 (m, 1H), 7.09 (t, *J* = 7.6 Hz, 1H), 6.99 (t, *J* = 6.4 Hz, 1H), 5.61 (brs, 2H), 5.08 (brs, 1H), 1.28 (s, 9H); <sup>13</sup>C NMR (151 MHz, CDCl<sub>3</sub>) δ 154.9, 152.1, 140.7, 139.5, 137.5, 129.0, 128.5, 127.6, 127.4, 126.9, 125.2, 125.1, 123.5, 79.6, 56.1, 48.1, 28.2; **Minor isomer:** <sup>1</sup>H NMR (600 MHz, CDCl<sub>3</sub>) δ 8.29 (d, *J* = 6.4 Hz, 1H), 7.48 (d, *J* = 7.9 Hz, 1H), 7.34 (d, *J* = 7.6 Hz, 2H), 7.28 (d, *J* = 7.6 Hz, 2H), 7.23-7.10 (m, 9H), 6.81 (d, *J* = 9.1 Hz, 1H), 5.63 (d, *J* = 11.5 Hz, 1H), 5.45 (t, *J* = 10.5 Hz, 1H), 1.26 (s, 9H); <sup>13</sup>C NMR (151 MHz, CDCl<sub>3</sub>) δ 155.5, 152.9, 141.3, 139.5, 137.6, 129.4, 128.6, 128.3, 127.4, 127.3, 127.3, 126.1, 126.0, 123.6, 79.1, 58.2, 50.0, 28.3; IR (ATR): 3227, 2978, 1698, 1491, 1237, 1169, 749 cm<sup>-1</sup>; HRMS (ESI) *m/z* calcd for C<sub>24</sub>H<sub>26</sub>N<sub>2</sub>NaO<sub>3</sub> [M+Na]<sup>+</sup> 413.1836, found: 413.1836; HPLC conditions: DAICEL Chiralpak IA-3 column, hexane/*i*-PrOH = 70/30, 254 nm, 1.0 mL/min, 40 °C, *t*<sub>major</sub> = 5.81 min, *t*<sub>minor</sub> = 7.88 min; [α]<sub>D</sub><sup>27</sup> = 52.7 (c = 0.67, CH<sub>3</sub>OH).

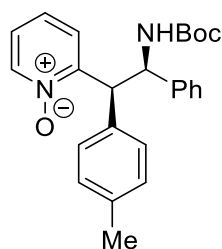

**2-((1R,2R)-2-((tert-Butoxycarbonyl)amino)-2-phenyl-1-(*p*-tolyl)ethyl)pyridine *N*-oxide (4ba)**

81% yield, 77/23 dr, 88% ee; **Major isomer:**  $^1\text{H NMR}$  (600 MHz,  $\text{CDCl}_3$ )  $\delta$  8.06 (dd,  $J = 6.5, 0.8$  Hz, 1H), 7.41-6.93 (m, 12H), 5.57 (brs, 2H), 5.11 (brs, 1H), 2.28 (s, 3H), 1.27 (s, 9H);  $^{13}\text{C NMR}$  (150 MHz,  $\text{CDCl}_3$ ) (representative peaks)  $\delta$  154.9, 152.2, 79.6, 56.2, 47.9, 28.1, 21.4; **Minor isomer:**  $^1\text{H NMR}$  (600 MHz,  $\text{CDCl}_3$ ) (representative peaks)  $\delta$  8.27 (d,  $J = 6.4$  Hz, 1H), 6.63 (dd,  $J = 9.2, 4.6$  Hz, 1H), 5.60 (d,  $J = 11.4$  Hz, 1H), 5.45 (dd,  $J = 11.1, 9.9$  Hz, 1H), 2.21 (s, 3H), 1.23 (s, 9H);  $^{13}\text{C NMR}$  (150 MHz,  $\text{CDCl}_3$ ) (representative peaks)  $\delta$  155.5, 153.1, 79.0, 58.2, 49.6, 28.2, 21.3; IR (ATR): 3230, 2976, 1698, 1365, 1294, 1229, 1169, 858  $\text{cm}^{-1}$ ; HRMS (ESI)  $m/z$  calcd for  $\text{C}_{25}\text{H}_{28}\text{N}_2\text{NaO}_3$   $[\text{M}+\text{Na}]^+$  427.1992, found: 427.1992; HPLC conditions: DAICEL Chiralpak IE-3 column, hexane/*i*-PrOH = 70/30, 254 nm, 1.0 mL/min, 40  $^\circ\text{C}$ ,  $t_{\text{major}} = 24.1$  min,  $t_{\text{minor}} = 25.8$  min;  $[\alpha]_{\text{D}}^{27} = 46.4$  ( $c = 0.49$ ,  $\text{CH}_3\text{OH}$ ).

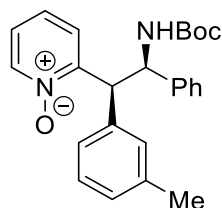

**2-((1R,2R)-2-((tert-Butoxycarbonyl)amino)-2-phenyl-1-(*m*-tolyl)ethyl)pyridine *N*-oxide (4ca)**

83% yield, 79/21 dr, 92% ee; **Major isomer:**  $^1\text{H NMR}$  (600 MHz,  $\text{CDCl}_3$ )  $\delta$  8.06 (dd,  $J = 6.4, 0.7$  Hz, 1H), 7.41-6.93 (m, 12H), 5.56 (brs, 2H), 5.08 (brs, 1H), 2.28 (s, 3H), 1.27 (s, 9H);  $^{13}\text{C NMR}$  (150 MHz,  $\text{CDCl}_3$ ) (representative peaks)  $\delta$  154.9, 152.2, 79.6, 56.1, 47.9, 28.2, 21.4; **Minor isomer:**  $^1\text{H NMR}$  (600 MHz,  $\text{CDCl}_3$ ) (representative peaks)  $\delta$  8.28 (d,  $J = 6.4$  Hz, 1H), 6.60 (d,  $J = 9.2$  Hz, 1H), 5.60 (t,  $J = 11.4$  Hz, 1H), 5.45 (dd,  $J = 11.1, 9.8$  Hz, 1H), 2.21 (s, 3H), 1.23 (s, 9H);  $^{13}\text{C NMR}$  (150 MHz,  $\text{CDCl}_3$ ) (representative peaks)  $\delta$  155.5, 153.1, 79.0, 58.2, 49.6, 28.2, 21.3; IR (ATR): 3337, 2976, 1700, 1364, 1250, 1017, 753, 700  $\text{cm}^{-1}$ ; HRMS (ESI)  $m/z$  calcd for  $\text{C}_{25}\text{H}_{28}\text{N}_2\text{NaO}_3$   $[\text{M}+\text{Na}]^+$  427.1992, found: 427.1992; HPLC conditions: DAICEL Chiralpak AD-3 column, hexane/*i*-PrOH = 70/30, 254 nm, 1.0 mL/min, 40  $^\circ\text{C}$ ,  $t_{\text{major}} = 6.08$  min,  $t_{\text{minor}} = 8.10$  min;  $[\alpha]_{\text{D}}^{25} = 40.0$  ( $c = 0.25$ ,  $\text{CH}_3\text{OH}$ ).

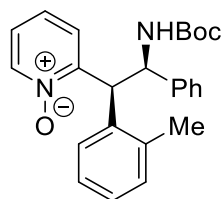

**2-((1R,2R)-2-((tert-Butoxycarbonyl)amino)-2-phenyl-1-(*o*-tolyl)ethyl)pyridine *N*-oxide (4da)** 42% yield, 83/17 dr, 84% ee; **Major isomer:**  $^1\text{H NMR}$  (600 MHz,  $\text{CDCl}_3$ )  $\delta$  8.04 (d,  $J = 6.3$  Hz, 1H), 7.43 (d,  $J = 7.9$  Hz, 1H), 7.36-6.95 (m, 11H), 5.57 (brs, 1H), 5.51 (brs, 1H), 5.19 (brs, 1H), 2.20 (s, 3H), 1.28 (s, 9H);  $^{13}\text{C NMR}$  (150 MHz,  $\text{CDCl}_3$ ) (representative peaks)  $\delta$  154.8, 152.6, 79.7, 56.6, 44.6, 28.2, 19.8; **Minor isomer:**  $^1\text{H NMR}$  (600 MHz,  $\text{CDCl}_3$ ) (representative peaks)  $\delta$  8.30 (d,  $J = 6.4$  Hz, 1H), 7.55 (d,  $J = 7.5$  Hz, 1H), 6.61 (dd,  $J = 18.5, 8.5$  Hz, 1H), 5.88 (dd,  $J = 11.6, 2.8$  Hz, 1H), 5.48 (t,  $J = 10.4$  Hz, 1H), 2.03 (s, 3H), 1.23 (s, 9H);  $^{13}\text{C NMR}$  (150 MHz,  $\text{CDCl}_3$ ) (representative peaks)  $\delta$  155.5, 153.1, 79.1, 58.5, 44.6, 28.3, 19.6; IR (ATR): 3210, 2975, 2928, 1703, 1491, 1433, 1365, 1236, 1170, 1011, 791, 752, 701  $\text{cm}^{-1}$ ; HRMS (ESI)  $m/z$  calcd for  $\text{C}_{25}\text{H}_{28}\text{N}_2\text{NaO}_3$   $[\text{M}+\text{Na}]^+$  427.1992, found: 427.1992; HPLC conditions: DAICEL Chiralpak IA-3 column, hexane/*i*-PrOH = 70/30, 254 nm, 1.0 mL/min, 40  $^\circ\text{C}$ ,  $t_{\text{major}} = 5.18$  min,  $t_{\text{minor}} = 7.00$  min;  $[\alpha]_{\text{D}}^{26} = 50.9$  ( $c = 0.47$ ,  $\text{CH}_3\text{OH}$ ).

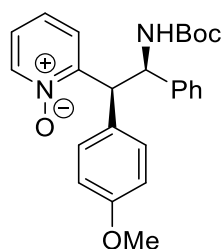

**2-((1R,2R)-2-((tert-Butoxycarbonyl)amino)-1-(4-methoxyphenyl)-2-phenylethyl)pyridine *N*-oxide (4ea)** 81% yield, 80/20 dr, 90% ee; **Major isomer:**  $^1\text{H NMR}$  (600 MHz,  $\text{CDCl}_3$ )  $\delta$  8.07 (d,  $J = 6.2$  Hz, 1H), 7.50-6.90 (m, 10H), 6.81 (d,  $J = 7.3$  Hz, 2H), 5.53 (brs, 2H), 5.08 (brs, 1H), 3.74 (s, 3H), 1.28 (s, 9H);  $^{13}\text{C NMR}$  (150 MHz,  $\text{CDCl}_3$ ) (representative peaks)  $\delta$  158.8, 155.0, 79.6, 56.1, 55.2, 47.4, 28.2; **Minor isomer:**  $^1\text{H NMR}$  (600 MHz,  $\text{CDCl}_3$ ) (representative peaks)  $\delta$  8.27 (t,  $J = 5.5$  Hz, 1H), 5.55 (d,  $J = 11.4$  Hz, 1H), 5.40 (t,  $J = 10.5$  Hz, 1H), 3.70 (s, 3H), 1.23 (s, 9H);  $^{13}\text{C NMR}$  (150 MHz,  $\text{CDCl}_3$ ) (representative peaks)  $\delta$  158.6, 155.5, 79.1, 58.5, 55.1, 49.0, 28.2; IR (ATR): 3230, 2976, 1698, 1609, 1510, 1432, 1365, 1251, 1171, 1035, 1015  $\text{cm}^{-1}$ ; HRMS (ESI)  $m/z$  calcd for  $\text{C}_{25}\text{H}_{28}\text{N}_2\text{NaO}_4$   $[\text{M}+\text{Na}]^+$  443.1941, found: 443.1941; HPLC conditions: DAICEL Chiralpak AD-3 column, hexane/*i*-PrOH = 70/30, 254 nm, 1.0 mL/min, 40  $^\circ\text{C}$ ,  $t_{\text{major}} = 6.76$  min,  $t_{\text{minor}} = 10.48$  min;  $[\alpha]_{\text{D}}^{26} = 39.9$  ( $c = 0.50$ ,  $\text{CH}_3\text{OH}$ ).

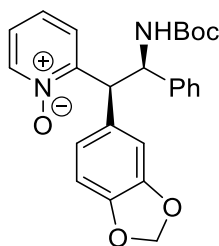

**2-((1R,2R)-1-(Benzo[d][1,3]dioxol-5-yl)-2-((tert-butoxycarbonyl)amino)-2-phenylethyl)pyridine N-oxide (4fa)** 77% yield, 76/24 dr, 90% ee; **Major isomer:**  $^1\text{H}$  NMR (600 MHz,  $\text{CDCl}_3$ )  $\delta$  8.07 (d,  $J = 6.5$  Hz, 1H), 7.86-6.40 (m, 11H), 5.88 (d,  $J = 1.7$  Hz, 2H), 5.48 (brs, 2H), 5.13 (brs, 1H), 1.29 (s, 9H);  $^{13}\text{C}$  NMR (150 MHz,  $\text{CDCl}_3$ ) (representative peaks)  $\delta$  154.9, 152.1, 79.7, 56.1, 47.8, 28.2; **Minor isomer:**  $^1\text{H}$  NMR (600 MHz,  $\text{CDCl}_3$ ) (representative peaks)  $\delta$  8.26 (d,  $J = 6.4$  Hz, 1H), 5.84 (d,  $J = 4.8$  Hz, 2H), 5.53 (d,  $J = 12.0$  Hz, 1H), 5.35 (t,  $J = 10.2$  Hz, 1H), 1.23 (s, 9H);  $^{13}\text{C}$  NMR (150 MHz,  $\text{CDCl}_3$ ) (representative peaks)  $\delta$  154.4, 153.0, 79.1, 58.2, 49.5, 28.2; IR (ATR): 3224, 2976, 1694, 1488, 1431, 1365, 1292, 1246, 1168, 1039, 931  $\text{cm}^{-1}$ ; HRMS (ESI)  $m/z$  calcd for  $\text{C}_{25}\text{H}_{26}\text{N}_2\text{NaO}_5$   $[\text{M}+\text{Na}]^+$  457.1734, found: 457.1734; HPLC conditions: DAICEL Chiralpak AD-3 column, hexane/*i*-PrOH = 70/30, 254 nm, 1.0 mL/min, 40  $^\circ\text{C}$ ,  $t_{\text{major}} = 10.55$  min,  $t_{\text{minor}} = 18.00$  min;  $[\alpha]_{\text{D}}^{25} = 34.6$  ( $c = 0.56$ ,  $\text{CH}_3\text{OH}$ ).

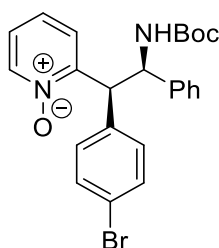

**2-((1R,2R)-1-(4-Bromophenyl)-2-((tert-butoxycarbonyl)amino)-2-phenylethyl)pyridine N-oxide (4ga)** 92% yield, 84/16 dr, 93% ee; **Major isomer:**  $^1\text{H}$  NMR (600 MHz,  $\text{CDCl}_3$ )  $\delta$  8.07 (dd,  $J = 6.5, 0.9$  Hz, 1H), 7.45-7.06 (m, 11H), 7.00 (t,  $J = 6.2$  Hz, 1H), 5.58 (brs, 1H), 5.52 (brs, 1H), 4.99 (d,  $J = 9.2$  Hz, 1H), 1.28 (s, 9H);  $^{13}\text{C}$  NMR (150 MHz,  $\text{CDCl}_3$ ) (representative peaks)  $\delta$  154.8, 151.5, 79.9, 55.7, 47.8, 28.2; **Minor isomer:**  $^1\text{H}$  NMR (600 MHz,  $\text{CDCl}_3$ ) (representative peaks)  $\delta$  8.26 (d,  $J = 6.4$  Hz, 1H), 6.42 (dd,  $J = 33.7, 9.3$  Hz, 1H), 5.56 (d,  $J = 11.4$  Hz, 1H), 5.40 (t,  $J = 10.8$  Hz, 1H), 1.24 (s, 9H);  $^{13}\text{C}$  NMR (150 MHz,  $\text{CDCl}_3$ ) (representative peaks)  $\delta$  155.4, 152.2, 79.3, 57.9, 49.4, 28.2; IR (ATR): 3237, 2980, 1697, 1542, 1490, 1276, 1259, 1169, 1012, 888  $\text{cm}^{-1}$ ; HRMS (ESI)  $m/z$  calcd for  $\text{C}_{24}\text{H}_{25}\text{BrN}_2\text{NaO}_3$   $[\text{M}+\text{Na}]^+$  491.0941, found: 491.0941; HPLC conditions: DAICEL Chiralpak AD-3 column, hexane/*i*-PrOH = 70/30, 254 nm, 1.0 mL/min, 40  $^\circ\text{C}$ ,  $t_{\text{major}} = 6.58$  min,  $t_{\text{minor}} = 9.39$  min;  $[\alpha]_{\text{D}}^{26} = 42.9$  ( $c = 0.57$ ,  $\text{CH}_3\text{OH}$ ).



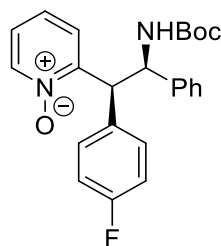

**2-((1R,2R)-2-((tert-Butoxycarbonyl)amino)-1-(4-fluorophenyl)-2-phenylethyl)pyridine**

**N-oxide (4ha)** 92% yield, 85/15 dr, 93% ee; **Major isomer:**  $^1\text{H}$  NMR (600 MHz,  $\text{CDCl}_3$ )  $\delta$  8.07 (dd,  $J = 6.4, 0.9$  Hz, 1H), 7.44-6.93 (m, 12H), 5.56 (brs, 2H), 5.07 (d,  $J = 8.8$  Hz, 1H), 1.27 (s, 9H);  $^{13}\text{C}$  NMR (150 MHz,  $\text{CDCl}_3$ ) (representative peaks)  $\delta$  163.0, 161.3, 130.8 (d,  $J_{\text{C-F}} = 7.7$  Hz), 115.40 (d,  $J_{\text{C-F}} = 21.5$  Hz), 79.9, 56.1, 47.6, 28.3; **Minor isomer:**  $^1\text{H}$  NMR (600 MHz,  $\text{CDCl}_3$ ) (representative peaks)  $\delta$  8.25 (dd,  $J = 6.4, 1.6$  Hz, 1H), 5.40 (t,  $J = 10.2$  Hz, 1H), 1.24 (s, 9H);  $^{13}\text{C}$  NMR (150 MHz,  $\text{CDCl}_3$ ) (representative peaks)  $\delta$  162.7, 161.1, 131.0 (d,  $J_{\text{C-F}} = 7.9$  Hz), 79.3, 58.2, 49.4, 28.4; IR (ATR): 3262, 2991, 1698, 1685, 1541, 1520, 1472, 1276, 1260, 1168  $\text{cm}^{-1}$ ; HRMS (ESI)  $m/z$  calcd for  $\text{C}_{24}\text{H}_{25}\text{FN}_2\text{NaO}_3$   $[\text{M}+\text{Na}]^+$  431.1741, found: 431.1741; HPLC conditions: DAICEL Chiralpak AD-3 column, hexane/*i*-PrOH = 70/30, 254 nm, 1.0 mL/min, 40  $^\circ\text{C}$ ,  $t_{\text{major}} = 5.49$  min,  $t_{\text{minor}} = 6.91$  min;  $[\alpha]_{\text{D}}^{27} = 72.0$  ( $c = 0.17$ ,  $\text{CH}_3\text{OH}$ ).

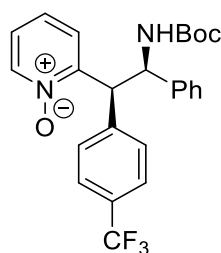

**2-((1R,2R)-2-((tert-Butoxycarbonyl)amino)-2-phenyl-1-(4-(trifluoromethyl)phenyl)ethyl)pyridine N-oxide (4ia)** 96% yield, 84/16 dr, 93% ee; **Major isomer:**  $^1\text{H}$  NMR (600 MHz,  $\text{CDCl}_3$ )  $\delta$  8.08 (dd,  $J = 6.4, 0.6$  Hz, 1H), 7.62-7.08 (m, 11H), 7.01 (t,  $J = 7.0$  Hz, 1H), 5.64 (brs, 2H), 5.01 (d,  $J = 9.3$  Hz, 1H), 1.24 (s, 9H);  $^{13}\text{C}$  NMR (150 MHz,  $\text{CDCl}_3$ ) (representative peaks)  $\delta$  154.9, 151.3, 124.2 (q,  $J_{\text{C-F}} = 271.8$  Hz), 80.0, 55.8, 48.3, 28.2; **Minor isomer:**  $^1\text{H}$  NMR (600 MHz,  $\text{CDCl}_3$ ) (representative peaks)  $\delta$  8.26 (d,  $J = 6.5$  Hz, 1H), 6.44 (dd,  $J = 59.9, 11.3$  Hz, 1H), 5.47 (t,  $J = 10.6$  Hz, 1H), 1.25 (s, 9H);  $^{13}\text{C}$  NMR (150 MHz,  $\text{CDCl}_3$ ) (representative peaks)  $\delta$  155.5, 152.0, 79.5, 57.8, 50.0, 28.3; IR (ATR): 3229, 2978, 1697, 1540, 1508, 1431, 1366, 1326, 1240, 1165, 1123, 1069, 1018  $\text{cm}^{-1}$ ; HRMS (ESI)  $m/z$  calcd for  $\text{C}_{25}\text{H}_{25}\text{F}_3\text{N}_2\text{NaO}_3$   $[\text{M}+\text{Na}]^+$  481.1710, found: 481.1709; HPLC conditions: DAICEL Chiralpak AD-3 column, hexane/*i*-PrOH = 80/20, 254 nm, 0.8 mL/min, 40  $^\circ\text{C}$ ,  $t_{\text{major}} = 8.88$  min,  $t_{\text{minor}} = 12.52$  min;  $[\alpha]_{\text{D}}^{27} = 58.4$  ( $c = 0.53$ ,  $\text{CH}_3\text{OH}$ ).

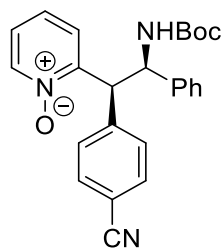

**2-((1*R*,2*R*)-2-((*tert*-Butoxycarbonyl)amino)-1-(4-cyanophenyl)-2-phenylethyl)pyridine**

*N*-oxide (**4ja**) 98% yield, 91/9 dr, 67% ee; **Major isomer:**  $^1\text{H NMR}$  (600 MHz,  $\text{CDCl}_3$ )  $\delta$  8.08 (d,  $J = 6.5$  Hz, 1H), 7.64-6.99 (m, 12H), 5.63 (brs, 2H), 4.93 (d,  $J = 9.5$  Hz, 1H), 1.26 (s, 9H);  $^{13}\text{C NMR}$  (150 MHz,  $\text{CDCl}_3$ ) (representative peaks)  $\delta$  154.8, 150.8, 80.2, 55.6, 48.6, 28.2; **Minor isomer:**  $^1\text{H NMR}$  (600 MHz,  $\text{CDCl}_3$ ) (representative peaks)  $\delta$  8.25 (d,  $J = 6.1$  Hz, 1H), 6.23 (dd,  $J = 31.2, 6.3$  Hz, 1H), 5.57 (d,  $J = 12.0$  Hz, 1H), 4.97 (d,  $J = 9.4$  Hz, 1H), 1.26 (s, 3H);  $^{13}\text{C NMR}$  (150 MHz,  $\text{CDCl}_3$ ) (representative peaks)  $\delta$  28.3; IR (ATR): 3263, 2977, 1698, 1522, 1507, 1456, 1433, 1366, 1251, 1168, 1015  $\text{cm}^{-1}$ ; HRMS (ESI)  $m/z$  calcd for  $\text{C}_{25}\text{H}_{25}\text{N}_3\text{NaO}_3$   $[\text{M}+\text{Na}]^+$  438.1788, found: 438.1788; HPLC conditions: DAICEL Chiralpak OD-3 column, hexane/*i*-PrOH = 80/20, 254 nm, 1.0 mL/min, 40  $^\circ\text{C}$ ,  $t_{\text{major}} = 5.55$  min,  $t_{\text{minor}} = 6.79$  min;  $[\alpha]_{\text{D}}^{27} = 20.7$  ( $c = 0.30$ ,  $\text{CH}_3\text{OH}$ ).

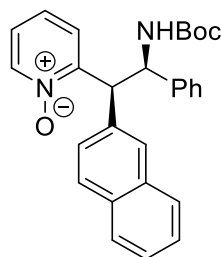

**2-((1*R*,2*R*)-2-((*tert*-Butoxycarbonyl)amino)-1-(naphthalen-2-yl)-2-phenylethyl)pyridine**

*N*-oxide (**4ka**) 93% yield, 82/18 dr, 89% ee; **Major isomer:**  $^1\text{H NMR}$  (600 MHz,  $\text{CDCl}_3$ )  $\delta$  8.07 (d,  $J = 6.4$  Hz, 1H), 7.95-7.05 (m, 14H), 6.96 (t,  $J = 6.2$  Hz, 1H), 5.81 (brs, 1H), 5.71 (brs, 1H), 5.21 (d,  $J = 8.7$  Hz, 1H), 1.20 (s, 9H);  $^{13}\text{C NMR}$  (150 MHz,  $\text{CDCl}_3$ ) (representative peaks)  $\delta$  155.1, 152.2, 79.8, 56.1, 48.2, 28.2; **Minor isomer:**  $^1\text{H NMR}$  (600 MHz,  $\text{CDCl}_3$ ) (representative peaks)  $\delta$  8.35-8.20 (m, 1H), 6.71 (dd,  $J = 28.3, 9.4$  Hz, 1H), 5.85 (d,  $J = 11.4$  Hz, 2H), 5.62 (dd,  $J = 11.1, 9.9$  Hz, 1H), 1.25 (s, 9H);  $^{13}\text{C NMR}$  (150 MHz,  $\text{CDCl}_3$ ) (representative peaks)  $\delta$  155.7, 153.1, 79.2, 58.3, 49.8, 28.4; IR (ATR): 3254, 2976, 1698, 1541, 1508, 1489, 1432, 1365, 1252, 1233, 1169, 1015  $\text{cm}^{-1}$ ; HRMS (ESI)  $m/z$  calcd for  $\text{C}_{28}\text{H}_{28}\text{N}_2\text{NaO}_3$   $[\text{M}+\text{Na}]^+$  463.1992, found: 463.1992; HPLC conditions: DAICEL Chiralpak AD-3 column, hexane/*i*-PrOH = 70/30, 254 nm, 1.0 mL/min, 40  $^\circ\text{C}$ ,  $t_{\text{major}} = 9.06$  min,  $t_{\text{minor}} = 14.25$  min;  $[\alpha]_{\text{D}}^{27} = 22.1$  ( $c = 0.48$ ,  $\text{CH}_3\text{OH}$ ).

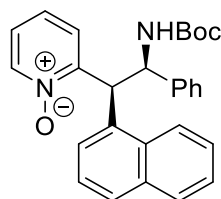

**2-((1R,2R)-2-((tert-Butoxycarbonyl)amino)-1-(naphthalen-1-yl)-2-phenylethyl)pyridine**

**N-oxide (4la)** 52% yield, 84/16 dr, 80% ee; **Major isomer:**  $^1\text{H NMR}$  (600 MHz,  $\text{CDCl}_3$ )  $\delta$  8.37 (d,  $J = 5.6$  Hz, 1H), 7.94 (d,  $J = 6.4$  Hz, 1H), 7.79 (dd,  $J = 17.2, 8.0$  Hz, 3H), 7.57-7.36 (m, 3H), 7.30 (d,  $J = 6.6$  Hz, 2H), 7.26 (dd,  $J = 8.1, 1.8$  Hz, 1H), 7.20-7.15 (m, 3H), 6.97 (t,  $J = 7.7$  Hz, 1H), 6.88 (t,  $J = 6.1$  Hz, 1H), 6.42 (d,  $J = 9.2$  Hz, 1H), 5.62 (brs, 1H), 5.29 (brs, 1H), 1.25 (s, 9H);  $^{13}\text{C NMR}$  (150 MHz,  $\text{CDCl}_3$ ) (representative peaks)  $\delta$  154.9, 152.1, 79.6, 57.4, 43.2, 28.2; **Minor isomer:**  $^1\text{H NMR}$  (600 MHz,  $\text{CDCl}_3$ ) (representative peaks)  $\delta$  7.98 (d,  $J = 8.4$  Hz, 1H), 7.73 (d,  $J = 7.8$  Hz, 1H), 7.68 (d,  $J = 8.2$  Hz, 1H), 6.71 (d,  $J = 11.6$  Hz, 1H), 6.60 (dd,  $J = 9.2, 6.3$  Hz, 1H), 5.73 (dd,  $J = 11.1, 9.8$  Hz, 1H), 1.22 (s, 9H);  $^{13}\text{C NMR}$  (150 MHz,  $\text{CDCl}_3$ ) (representative peaks)  $\delta$  155.5, 153.5, 79.1, 58.2, 42.5, 28.2; IR (ATR): 3320, 2976, 1698, 1508, 1456, 1365, 1260, 1166, 1016  $\text{cm}^{-1}$ ; HRMS (ESI)  $m/z$  calcd for  $\text{C}_{28}\text{H}_{28}\text{N}_2\text{NaO}_3$   $[\text{M}+\text{Na}]^+$  463.1992, found: 463.1992; HPLC conditions: DAICEL Chiralpak AD-3 column, hexane/*i*-PrOH = 70/30, 254 nm, 1.0 mL/min, 40 °C,  $t_{\text{major}} = 7.29$  min,  $t_{\text{minor}} = 10.62$  min;  $[\alpha]_{\text{D}}^{27} = -88.4$  ( $c = 0.36$ ,  $\text{CH}_3\text{OH}$ ).

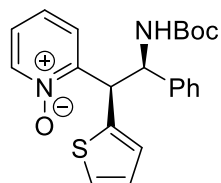

**2-((1R,2R)-2-((tert-Butoxycarbonyl)amino)-2-phenyl-1-(thiophen-2-yl)ethyl)pyridine N-oxide**

**(4ma)** 92% yield, 60/40 dr, 86% ee; **Major isomer:**  $^1\text{H NMR}$  (600 MHz,  $\text{CDCl}_3$ )  $\delta$  8.18 (d,  $J = 6.0$  Hz, 1H), 7.44 (d,  $J = 7.5$  Hz, 1H), 7.40-6.98 (m, 9H), 6.95 (dd,  $J = 5.1, 3.6$  Hz, 1H), 5.90 (brs, 1H), 5.61 (t,  $J = 8.0$  Hz, 1H), 5.54 (brs, 1H), 1.33 (s, 9H);  $^{13}\text{C NMR}$  (150 MHz,  $\text{CDCl}_3$ ) (representative peaks)  $\delta$  154.9, 151.3, 79.6, 56.8, 44.5, 28.2; **Minor isomer:**  $^1\text{H NMR}$  (600 MHz,  $\text{CDCl}_3$ ) (representative peaks)  $\delta$  8.32 (d,  $J = 6.3$  Hz, 1H), 7.51 (d,  $J = 7.9$  Hz, 1H), 6.87 (dd,  $J = 4.7, 3.9$  Hz, 1H), 6.64 (dd,  $J = 7.9, 6.6$  Hz, 1H), 5.97 (d,  $J = 11.1$  Hz, 1H), 5.36 (t,  $J = 10.3$  Hz, 1H), 1.23 (s, 9H);  $^{13}\text{C NMR}$  (150 MHz,  $\text{CDCl}_3$ ) (representative peaks)  $\delta$  155.3, 152.9, 79.1, 59.9, 44.8, 28.2; IR (ATR): 3236, 2974, 1703, 1541, 1491, 1431, 1364, 1289, 1248, 1169, 794, 700  $\text{cm}^{-1}$ ; HRMS (ESI)  $m/z$  calcd for  $\text{C}_{22}\text{H}_{24}\text{N}_2\text{NaO}_3\text{S}$   $[\text{M}+\text{Na}]^+$  419.1400, found: 419.1400; HPLC conditions: DAICEL Chiralpak IA-3 column, hexane/*i*-PrOH = 70/30, 254 nm, 0.5 mL/min, 30 °C,  $t_{\text{major}} = 18.38$  min,  $t_{\text{minor}} = 25.98$  min;  $[\alpha]_{\text{D}}^{27} = 14.2$  ( $c = 0.73$ ,  $\text{CH}_3\text{OH}$ ).

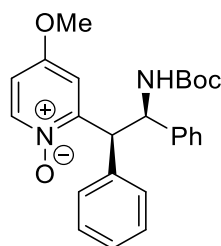

**2-((1R,2R)-2-((tert-Butoxycarbonyl)amino)-1,2-diphenylethyl)-4-methoxypyridine N-oxide (4na)** 93% yield, 89/11 dr, 92% ee; **Major isomer:**  $^1\text{H NMR}$  (600 MHz,  $\text{CDCl}_3$ )  $\delta$  7.99 (d,  $J = 7.2$  Hz, 1H), 7.46-7.07 (m, 10H), 6.94 (d,  $J = 3.4$  Hz, 1H), 6.54 (dd,  $J = 7.2, 3.3$  Hz, 1H), 5.57 (brs, 2H), 5.15 (d,  $J = 8.3$  Hz, 1H), 3.73 (s, 3H), 1.27 (s, 9H);  $^{13}\text{C NMR}$  (150 MHz,  $\text{CDCl}_3$ ) (representative peaks)  $\delta$  157.3, 155.1, 79.8, 56.2, 56.0, 48.4, 28.3; **Minor isomer:**  $^1\text{H NMR}$  (600 MHz,  $\text{CDCl}_3$ ) (representative peaks)  $\delta$  8.16 (t,  $J = 7.3$  Hz, 1H), 6.98 (dd,  $J = 13.1, 3.2$  Hz, 1H), 6.72-6.62 (m, 1H), 5.63 (d,  $J = 11.4$  Hz, 1H), 5.43 (dd,  $J = 11.2, 9.6$  Hz, 1H), 3.79 (d,  $J = 4.8$  Hz, 3H), 1.25 (s, 9H);  $^{13}\text{C NMR}$  (150 MHz,  $\text{CDCl}_3$ ) (representative peaks)  $\delta$  158.2, 155.8, 79.2, 58.4, 56.1, 50.4, 28.4; IR (ATR): 3436, 2976, 1705, 1492, 1458, 1430, 1307, 1226, 1170, 1039  $\text{cm}^{-1}$ ; HRMS (ESI)  $m/z$  calcd for  $\text{C}_{25}\text{H}_{28}\text{N}_2\text{NaO}_4$   $[\text{M}+\text{Na}]^+$  443.1941, found: 443.1941; HPLC conditions: DAICEL Chiralpak AD-3 column, hexane/*i*-PrOH = 70/30, 254 nm, 1.0 mL/min, 40  $^\circ\text{C}$ ,  $t_{\text{major}} = 5.64$  min,  $t_{\text{minor}} = 7.73$  min;  $[\alpha]_{\text{D}}^{27} = 97.1$  ( $c = 0.43$ ,  $\text{CH}_3\text{OH}$ ).

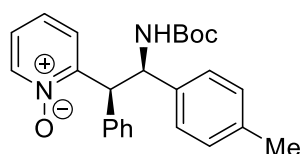

**2-((1R,2R)-2-((tert-Butoxycarbonyl)amino)-1-phenyl-2-(*p*-tolylethyl)pyridine N-oxide (4ab)** 76% yield, 78/22 dr, 90% ee; **Major isomer:**  $^1\text{H NMR}$  (600 MHz,  $\text{CDCl}_3$ )  $\delta$  8.07 (dd,  $J = 6.5, 0.9$  Hz, 1H), 7.55-6.91 (m, 12H), 5.56 (brs, 2H), 5.00 (brs, 1H), 2.24 (s, 3H), 1.26 (s, 9H);  $^{13}\text{C NMR}$  (150 MHz,  $\text{CDCl}_3$ ) (representative peaks)  $\delta$  155.0, 152.3, 79.7, 55.9, 48.1, 28.3, 21.1; **Minor isomer:**  $^1\text{H NMR}$  (600 MHz,  $\text{CDCl}_3$ ) (representative peaks)  $\delta$  8.28 (d,  $J = 6.4$  Hz, 1H), 6.54-6.31 (m, 1H), 5.64 (d,  $J = 11.4$  Hz, 2H), 5.43 (dd,  $J = 11.0, 10.0$  Hz, 1H), 2.22 (s, 3H), 1.23 (s, 9H);  $^{13}\text{C NMR}$  (150 MHz,  $\text{CDCl}_3$ ) (representative peaks)  $\delta$  155.6, 153.2, 79.2, 58.0, 49.7, 28.4; IR (ATR): 3223, 2977, 1695, 1515, 1490, 1431, 1365, 1236, 1167, 1014, 750  $\text{cm}^{-1}$ ; HRMS (ESI)  $m/z$  calcd for  $\text{C}_{25}\text{H}_{28}\text{N}_2\text{NaO}_3$   $[\text{M}+\text{Na}]^+$  427.1992, found: 427.1992; HPLC conditions: DAICEL Chiralpak AD-3 column, hexane/*i*-PrOH = 70/30, 254 nm, 1.0 mL/min, 40  $^\circ\text{C}$ ,  $t_{\text{major}} = 6.26$  min,  $t_{\text{minor}} = 8.82$  min;  $[\alpha]_{\text{D}}^{27} = 69.8$  ( $c = 0.51$ ,  $\text{CH}_3\text{OH}$ ).

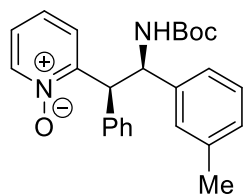

**2-((1R,2R)-2-((tert-Butoxycarbonyl)amino)-1-phenyl-2-(*m*-tolyl)ethyl)pyridine *N*-oxide (4ac)**

76% yield, 77/23 dr, 86% ee; **Major isomer:**  $^1\text{H NMR}$  (600 MHz,  $\text{CDCl}_3$ )  $\delta$  8.08 (d,  $J = 6.4$  Hz, 1H), 7.57-6.72 (m, 12H), 5.53 (brs, 2H), 5.03 (brs, 1H), 2.24 (s, 3H), 1.26 (s, 9H);  $^{13}\text{C NMR}$  (150 MHz,  $\text{CDCl}_3$ ) (representative peaks)  $\delta$  155.0, 152.3, 79.7, 56.1, 48.5, 28.3, 21.5; **Minor isomer:**  $^1\text{H NMR}$  (600 MHz,  $\text{CDCl}_3$ ) (representative peaks)  $\delta$  8.33-8.23 (m, 1H), 6.66-6.35 (m, 1H), 5.63 (d,  $J = 11.4$  Hz, 1H), 5.43 (t,  $J = 10.5$  Hz, 1H), 1.23 (s, 9H);  $^{13}\text{C NMR}$  (150 MHz,  $\text{CDCl}_3$ ) (representative peaks)  $\delta$  155.6, 153.1, 79.2, 58.3, 49.9, 28.4; IR (ATR): 3220, 2977, 1693, 1492, 1429, 1365, 1233, 1168, 1041, 1014  $\text{cm}^{-1}$ ; HRMS (ESI)  $m/z$  calcd for  $\text{C}_{25}\text{H}_{28}\text{N}_2\text{NaO}_3$   $[\text{M}+\text{Na}]^+$  427.1992, found: 427.1992; HPLC conditions: DAICEL Chiralpak AD-3 column, hexane/*i*-PrOH = 70/30, 254 nm, 1.0 mL/min, 40  $^\circ\text{C}$ ,  $t_{\text{major}} = 5.13$  min,  $t_{\text{minor}} = 6.78$  min;  $[\alpha]_{\text{D}}^{27} = 58.8$  ( $c = 0.56$ ,  $\text{CH}_3\text{OH}$ ).

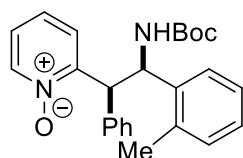

**2-(2-((tert-Butoxycarbonyl)amino)-1-phenyl-2-(*o*-tolyl)ethyl)pyridine *N*-oxide (4ad)**

45% yield, 47/53 dr, 56/7% ee; **Major isomer:**  $^1\text{H NMR}$  (600 MHz,  $\text{CDCl}_3$ )  $\delta$  8.25 (d,  $J = 6.2$  Hz, 1H), 7.71 (d,  $J = 5.8$  Hz, 1H), 7.47-6.87 (m, 11H), 6.50 (s, 1H), 5.84-5.68 (m, 2H), 2.23 (s, 3H), 1.24 (s, 9H);  $^{13}\text{C NMR}$  (150 MHz,  $\text{CDCl}_3$ ) (representative peaks)  $\delta$  155.6, 153.1, 79.2, 58.3, 49.9, 28.4; **Minor isomer:**  $^1\text{H NMR}$  (600 MHz,  $\text{CDCl}_3$ ) (representative peaks)  $\delta$  8.09 (d,  $J = 6.4$  Hz, 1H), 7.63 (s, 1H), 5.56 (brs, 1H), 4.86 (brs, 1H), 2.47 (s, 3H), 1.25 (s, 9H);  $^{13}\text{C NMR}$  (150 MHz,  $\text{CDCl}_3$ ) (representative peaks)  $\delta$  154.6, 152.3, 79.5, 52.1, 47.6, 28.1; IR (ATR): 3230, 2976, 1699, 1541, 1522, 1508, 1432, 1365, 1171, 1040, 1012  $\text{cm}^{-1}$ ; HRMS (ESI)  $m/z$  calcd for  $\text{C}_{25}\text{H}_{28}\text{N}_2\text{NaO}_3$   $[\text{M}+\text{Na}]^+$  427.1992, found: 427.1992; HPLC conditions: DAICEL Chiralpak AD-3 column, hexane/*i*-PrOH = 70/30, 254 nm, 1.0 mL/min, 40  $^\circ\text{C}$ ,  $t_{\text{major}} = 5.83$  min,  $t_{\text{minor}} = 11.57$  min;  $[\alpha]_{\text{D}}^{27} = 56.4$  ( $c = 0.33$ ,  $\text{CH}_3\text{OH}$ ).

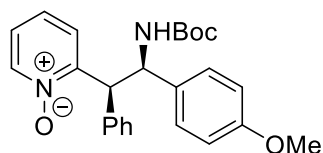

**2-((1R,2R)-2-((tert-Butoxycarbonyl)amino)-2-(4-methoxyphenyl)-1-phenylethyl)pyridine**

***N*-oxide (4ae)** 91% yield, 83/17 dr, 92% ee; **Major isomer:**  $^1\text{H NMR}$  (600 MHz,  $\text{CDCl}_3$ )  $\delta$  8.07 (dd,  $J = 6.4, 0.9$  Hz, 1H), 7.61-6.90 (m, 10H), 6.80-6.68 (m, 2H), 5.58 (brs, 1H), 5.53 (brs, 1H), 5.07 (d,  $J = 7.5$  Hz, 1H), 3.71 (s, 3H), 1.25 (s, 9H);  $^{13}\text{C NMR}$  (150 MHz,  $\text{CDCl}_3$ ) (representative

peaks)  $\delta$  158.8, 154.9, 79.5, 55.5, 55.1, 48.0, 28.2; **Minor isomer:**  $^1\text{H}$  NMR (600 MHz,  $\text{CDCl}_3$ ) (representative peaks)  $\delta$  8.26 (t,  $J = 5.6$  Hz, 1H), 6.55 (dd,  $J = 28.2, 9.5$  Hz, 1H), 5.61 (d,  $J = 11.5$  Hz, 1H), 5.41 (t,  $J = 10.8$  Hz, 1H), 3.70 (s, 3H), 1.23 (s, 9H);  $^{13}\text{C}$  NMR (150 MHz,  $\text{CDCl}_3$ ) (representative peaks)  $\delta$  158.6, 155.5, 79.0, 57.6, 55.1, 49.8, 28.2; IR (ATR): 3271, 2976, 1686, 1512, 1241, 1166, 1035, 1013, 829, 746  $\text{cm}^{-1}$ ; HRMS (ESI)  $m/z$  calcd for  $\text{C}_{25}\text{H}_{28}\text{N}_2\text{NaO}_4$   $[\text{M}+\text{Na}]^+$  443.1941, found: 443.1941; HPLC conditions: DAICEL Chiralpak AD-3 column, hexane/*i*-PrOH = 70/30, 254 nm, 1.0 mL/min, 40  $^\circ\text{C}$ ,  $t_{\text{major}} = 7.50$  min,  $t_{\text{minor}} = 13.00$  min;  $[\alpha]_{\text{D}}^{27} = 78.4$  ( $c = 0.39$ ,  $\text{CH}_3\text{OH}$ ).

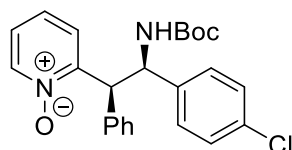

**2-((1R,2R)-2-((tert-Butoxycarbonyl)amino)-2-(4-chlorophenyl)-1-phenylethyl)pyridine**

**1-oxide (4af)** 81% yield, 80/20 dr, 89% ee; **Major isomer:**  $^1\text{H}$  NMR (600 MHz,  $\text{CDCl}_3$ )  $\delta$  8.08 (dd,  $J = 6.4, 0.9$  Hz, 1H), 7.56-6.95 (m, 12H), 5.67-5.50 (m, 2H), 5.13 (brs, 1H), 1.27 (s, 9H);  $^{13}\text{C}$  NMR (150 MHz,  $\text{CDCl}_3$ ) (representative peaks)  $\delta$  154.9, 151.8, 79.9, 55.6, 47.9, 28.2; **Minor isomer:**  $^1\text{H}$  NMR (600 MHz,  $\text{CDCl}_3$ ) (representative peaks)  $\delta$  8.28 (t,  $J = 6.1$  Hz, 1H), 6.81 (dd,  $J = 28.0, 9.1$  Hz, 1H), 5.41 (t,  $J = 10.2$  Hz, 1H), 1.24 (d,  $J = 3.6$  Hz, 9H);  $^{13}\text{C}$  NMR (150 MHz,  $\text{CDCl}_3$ ) (representative peaks)  $\delta$  155.5, 152.6, 79.3, 58.0, 49.7, 28.2; IR (ATR): 3263, 2978, 1698, 1522, 1508, 1431, 1365, 1168, 1090, 1014  $\text{cm}^{-1}$ ; HRMS (ESI)  $m/z$  calcd for  $\text{C}_{24}\text{H}_{25}\text{ClN}_2\text{NaO}_3$   $[\text{M}+\text{Na}]^+$  447.1446, found: 447.1446; HPLC conditions: DAICEL Chiralpak AD-3 column, hexane/*i*-PrOH = 70/30, 254 nm, 1.0 mL/min, 40  $^\circ\text{C}$ ,  $t_{\text{major}} = 6.59$  min,  $t_{\text{minor}} = 11.52$  min;  $[\alpha]_{\text{D}}^{27} = 41.7$  ( $c = 0.55$ ,  $\text{CH}_3\text{OH}$ ).

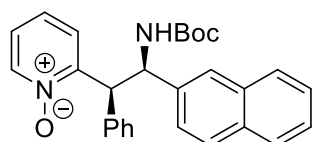

**2-((1R,2R)-2-((tert-Butoxycarbonyl)amino)-2-(naphthalen-2-yl)-1-phenylethyl)pyridine**

**N-oxide (4ag)** 66% yield, 74/26 dr, 88% ee; **Major isomer:**  $^1\text{H}$  NMR (600 MHz,  $\text{CDCl}_3$ )  $\delta$  8.06 (d,  $J = 6.3$  Hz, 1H), 7.83-6.82 (m, 15H), 5.75 (brs, 2H), 5.27 (d,  $J = 6.9$  Hz, 1H), 1.26 (s, 9H);  $^{13}\text{C}$  NMR (150 MHz,  $\text{CDCl}_3$ ) (representative peaks)  $\delta$  155.1, 152.2, 79.8, 56.4, 48.2, 28.3; **Minor isomer:**  $^1\text{H}$  NMR (600 MHz,  $\text{CDCl}_3$ ) (representative peaks)  $\delta$  8.29 (d,  $J = 6.4$  Hz, 1H), 5.80 (dd,  $J = 11.6, 2.9$  Hz, 1H), 5.64 (t,  $J = 10.4$  Hz, 1H), 1.24 (d,  $J = 4.0$  Hz, 9H);  $^{13}\text{C}$  NMR (150 MHz,  $\text{CDCl}_3$ ) (representative peaks)  $\delta$  155.7, 153.1, 79.3, 58.6, 49.8, 28.4; HRMS (ESI)  $m/z$  calcd for  $\text{C}_{28}\text{H}_{28}\text{N}_2\text{NaO}_3$   $[\text{M}+\text{Na}]^+$  463.1992, found: 463.1992; IR (ATR): 3203, 2972, 1699, 1490, 1432, 1365, 1236, 1169, 1014, 822, 749  $\text{cm}^{-1}$ ; HPLC conditions: DAICEL Chiralpak AD-3 column, hexane/*i*-PrOH = 70/30, 254 nm, 1.0 mL/min, 40  $^\circ\text{C}$ ,  $t_{\text{major}} = 7.25$  min,  $t_{\text{minor}} = 10.42$  min;  $[\alpha]_{\text{D}}^{27} = 93.6$  ( $c = 0.44$ ,  $\text{CH}_3\text{OH}$ ).

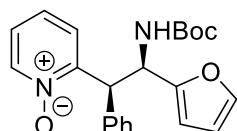

**2-((1R,2R)-2-((tert-Butoxycarbonyl)amino)-2-(furan-2-yl)-1-phenylethyl)pyridine N-oxide (4ah)** 61% yield, 67/33 dr, 71% ee; **Major isomer:**  $^1\text{H}$  NMR (600 MHz,  $\text{CDCl}_3$ )  $\delta$  8.13 (d,  $J = 6.4$  Hz, 1H), 7.54-6.97 (m, 9H), 6.14 (s, 2H), 5.68 (d,  $J = 8.2$  Hz, 1H), 5.52 (brs, 1H), 5.41 (brs, 1H), 1.30 (s, 9H);  $^{13}\text{C}$  NMR (150 MHz,  $\text{CDCl}_3$ ) (representative peaks)  $\delta$  155.1, 153.5, 152.1, 79.9, 50.7, 47.8, 28.3; **Minor isomer:**  $^1\text{H}$  NMR (600 MHz,  $\text{CDCl}_3$ ) (representative peaks)  $\delta$  8.24 (d,  $J = 6.4$  Hz, 1H), 6.12-6.10 (m, 1H), 5.72 (d,  $J = 12.0$  Hz, 1H), 5.59 (t,  $J = 10.8$  Hz, 1H), 1.26 (s, 9H);  $^{13}\text{C}$  NMR (150 MHz,  $\text{CDCl}_3$ ) (representative peaks)  $\delta$  155.5, 153.0, 152.4, 79.6, 51.7, 47.6; IR (ATR): 3216, 2976, 1698, 1490, 1431, 1240, 1168, 1011, 749  $\text{cm}^{-1}$ ; HRMS (ESI)  $m/z$  calcd for  $\text{C}_{22}\text{H}_{24}\text{N}_2\text{NaO}_4$   $[\text{M}+\text{Na}]^+$  431.1628, found: 431.1628; HPLC conditions: DAICEL Chiralpak OD-3 column, hexane/*i*-PrOH = 90/10, 254 nm, 1.0 mL/min, 30  $^\circ\text{C}$ ,  $t_{\text{major}} = 11.59$  min,  $t_{\text{minor}} = 14.65$  min;  $[\alpha]_{\text{D}}^{27} = 53.7$  ( $c = 0.60$ ,  $\text{CH}_3\text{OH}$ ).

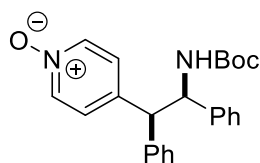

**4-(2-((tert-Butoxycarbonyl)amino)-1,2-diphenylethyl)pyridine N-oxide (4oa)** 90% yield, 82/18 dr, 32% ee; **Major isomer:**  $^1\text{H}$  NMR (600 MHz,  $\text{CDCl}_3$ )  $\delta$  7.91 (d,  $J = 6.9$  Hz, 2H), 7.79-7.04 (m, 10H), 6.90 (d,  $J = 6.3$  Hz, 2H), 5.35 (brs, 1H), 5.10 (brs, 1H), 4.43-4.08 (m, 1H), 1.27 (s, 9H);  $^{13}\text{C}$  NMR (150 MHz,  $\text{CDCl}_3$ ) (representative peaks)  $\delta$  154.8, 80.0, 56.9, 56.6, 28.2; **Minor isomer:**  $^1\text{H}$  NMR (600 MHz,  $\text{CDCl}_3$ ) (representative peaks)  $\delta$  8.08 (d,  $J = 7.0$  Hz, 2H), 6.99 (d,  $J = 7.3$  Hz, 2H), 1.31 (s, 9H);  $^{13}\text{C}$  NMR (150 MHz,  $\text{CDCl}_3$ ) (representative peaks)  $\delta$  154.9, 28.2; IR (ATR): 3217, 2977, 1704, 1540, 1487, 1365, 1242, 1174, 1013, 750, 700  $\text{cm}^{-1}$ ; HRMS (ESI)  $m/z$  calcd for  $\text{C}_{24}\text{H}_{26}\text{N}_2\text{NaO}_3$   $[\text{M}+\text{Na}]^+$  413.1836, found: 413.1835; HPLC conditions: DAICEL Chiralpak IA-3 column, hexane/*i*-PrOH = 70/30, 254 nm, 1.0 mL/min, 40  $^\circ\text{C}$ ,  $t_{\text{major}} = 6.29$  min,  $t_{\text{minor}} = 7.48$  min;  $[\alpha]_{\text{D}}^{26} = 28.5$  ( $c = 0.11$ ,  $\text{CH}_3\text{OH}$ ).

## 6. Catalytic reaction in larger scale and reduction of pyridine *N*-oxide

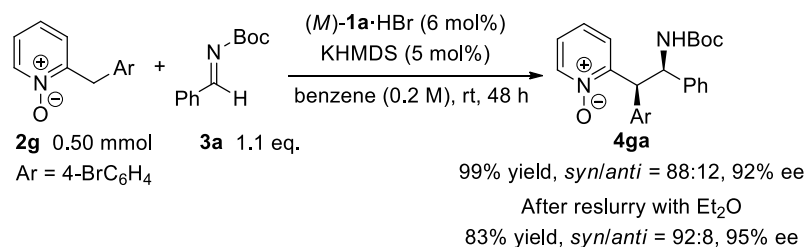

To a dried test tube was added (*M*)-**1a**-HBr (24.0 mg, 0.030 mmol), then 2.5 mL anhydrous benzene was added under argon atmosphere. A solution of KN(SiMe<sub>3</sub>)<sub>2</sub> in toluene (0.5 M, 50 μL, 0.025 mmol) was added to the suspension at room temperature. After stirring for ca. 3 min, 2-(4-bromobenzyl)pyridine *N*-oxide **2g** (0.13 g, 0.50 mmol) was added in one portion and the mixture was stirred for 3 min. Then *N*-Boc imine **3a** (0.12 g, 0.60 mmol) was added to the solution. After that, the reaction mixture was stirred at room temperature for 48 h. The reaction was quenched with 3.0 mL saturated NH<sub>4</sub>Cl aq. and extracted with CH<sub>2</sub>Cl<sub>2</sub> (20 mL × 3). The combined organic phase was dried over sodium sulfate, and concentrated in vacuo. The residue was purified by silica gel column chromatography (hexane/ethyl acetate/Methanol = 3:9:1 as the eluent) to afford the corresponding product as a white solid **4ga** (0.23 g, 99% yield, 82/18 dr, 92% ee). The solid was reslurried in 20 mL ether for 2 h. After filtration, the product was obtained in 83% yield with the improvement of dr and ee values.

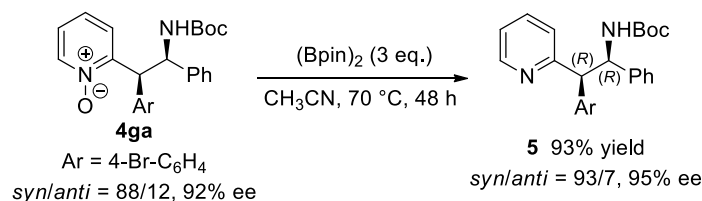

To a 30 mL two-neck flask were added the adduct **4ga** (94.0 mg, 0.20 mmol), bis(pinacolato)diboron (0.15 g, 0.60 mmol) and 4.0 mL acetonitrile. The solution was stirred at 70 °C for 48 h. After that, the mixture was cooled to room temperature, 1.6 mL 1,2-diaminoethane was added, and the mixture was stirred at rt for 1 h. The product was extracted with CH<sub>2</sub>Cl<sub>2</sub> (10 mL × 3). The combined organic phase was dried over sodium sulfate, and concentrated in vacuo. The residue was purified by silica gel column chromatography (hexane/ethyl acetate = 4:1 as the eluent) to afford **5** as a white solid.

**tert-Butyl ((1*R*,2*R*)-2-(4-bromophenyl)-1-phenyl-2-(pyridin-2-yl)ethyl)carbamate (5)** 93% yield, 93/7 dr, 95% ee; <sup>1</sup>H NMR (600 MHz, CDCl<sub>3</sub>) δ 8.48 (d, *J* = 4.1 Hz, 1H), 7.45-7.41 (m, 2H), 7.40-7.36 (m, 3H), 7.23-7.05 (m, 5H), 7.02-6.92 (m, 2H), 5.66 (brs, 1H), 5.01 (brs, 1H), 4.34 (brs, 1H), 1.27 (s, 9H); <sup>13</sup>C NMR (150 MHz, CDCl<sub>3</sub>) δ 159.9, 154.9, 149.2, 141.4, 139.1, 136.3, 131.4, 130.7, 128.1, 127.1, 127.0, 123.3, 121.6, 121.0, 83.5, 59.6, 28.1, 25.0; IR (ATR): 2917, 2849, 1687,



1510, 1170, 772  $\text{cm}^{-1}$ ; HRMS (ESI)  $m/z$  calcd for  $\text{C}_{24}\text{H}_{25}\text{BrN}_2\text{NaO}_2$   $[\text{M}+\text{Na}]^+$  475.0992, found: 475.0992; HPLC conditions: DAICEL Chiralpak AD-3 column, hexane/*i*-PrOH = 70/30, 254 nm, 1.0 mL/min, 40 °C,  $t_{\text{major}} = 7.46$  min,  $t_{\text{minor}} = 7.06$  min;  $[\alpha]_{\text{D}}^{26} = -2.3$  ( $c = 0.32$ ,  $\text{CHCl}_3$ ); CCDC No. 1811498.

**ORTEP Diagram of 5 (recrystallized from THF)**

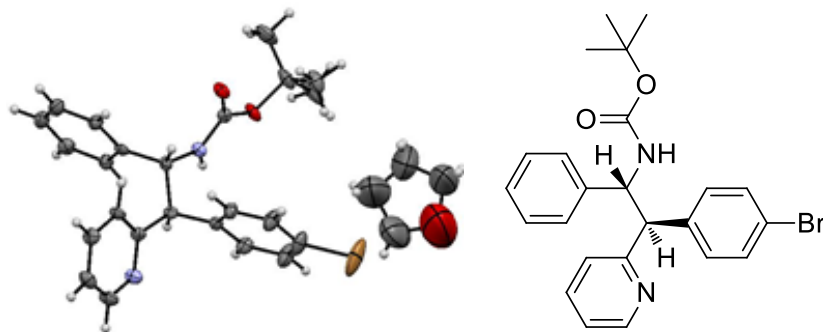

## 7. HPLC Charts

Compound **4aa**

HPLC conditions: DAICEL Chiralpak IA-3 column, hexane/*i*-PrOH = 70/30, 254 nm, 1.0 mL/min, 40 °C,  $t_{\text{major}} = 5.81$  min,  $t_{\text{minor}} = 7.88$  min.

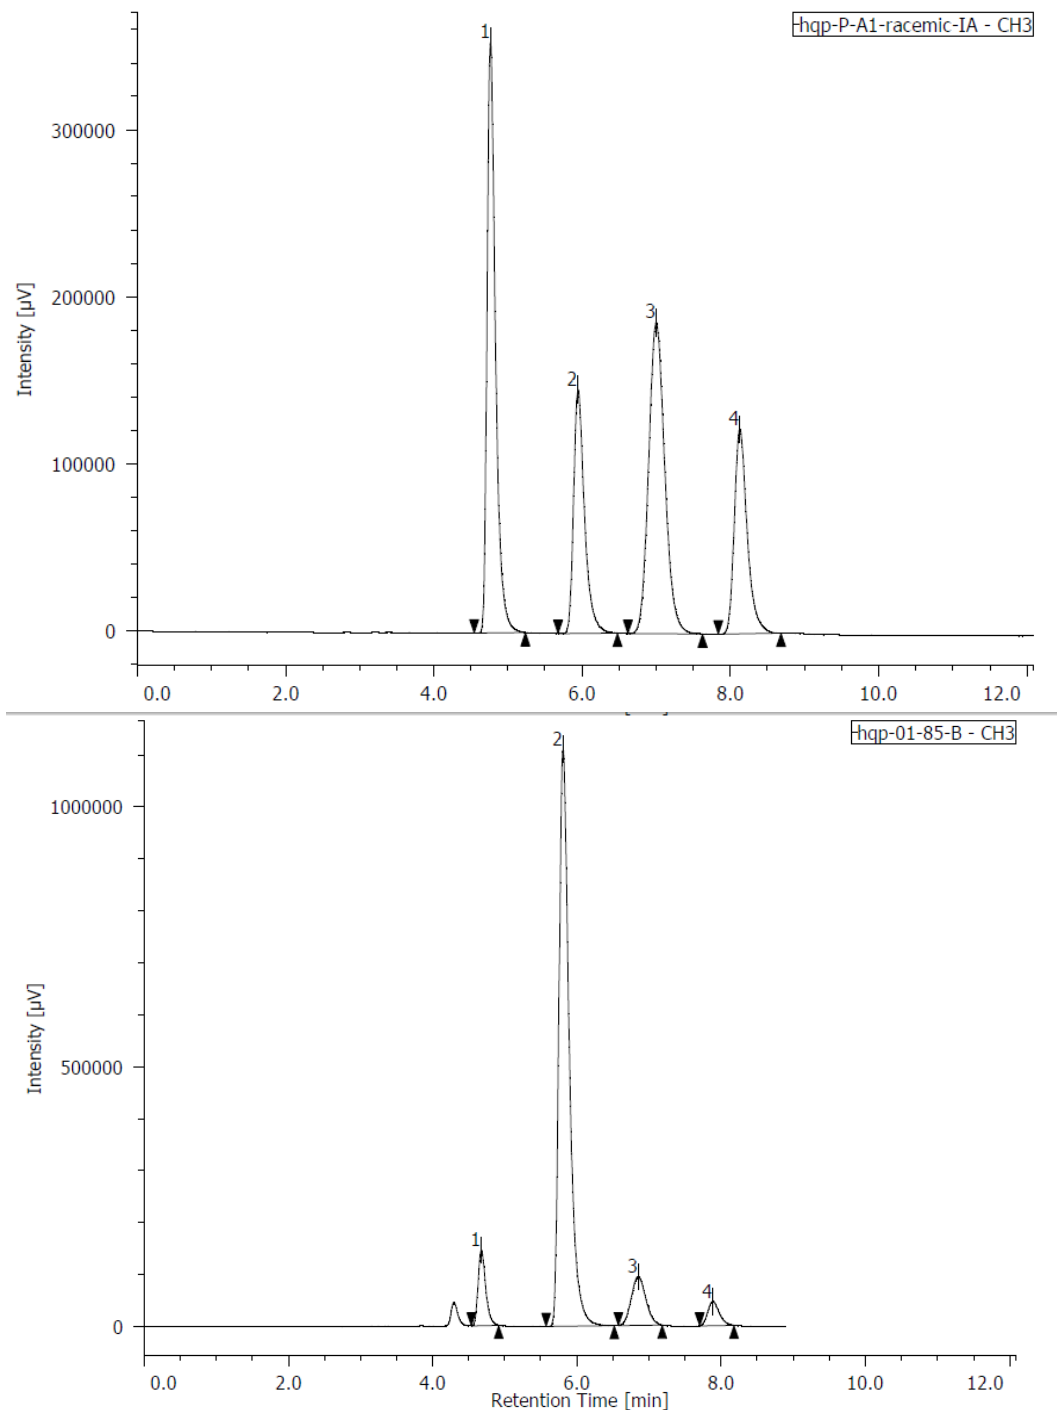

| Peak                 | 1    | 2    | 3    | 4    |
|----------------------|------|------|------|------|
| Retention Time (min) | 4.68 | 5.81 | 6.85 | 7.88 |
| Area (%)             | 7.7  | 79.0 | 9.6  | 3.7  |

Compound **4ba**

HPLC conditions: DAICEL Chiralpak IE-3 column, hexane/*i*-PrOH = 70/30, 254 nm, 1.0 mL/min, 40 °C,  $t_{\text{major}} = 24.1 \text{ min}$ ,  $t_{\text{minor}} = 25.8 \text{ min}$

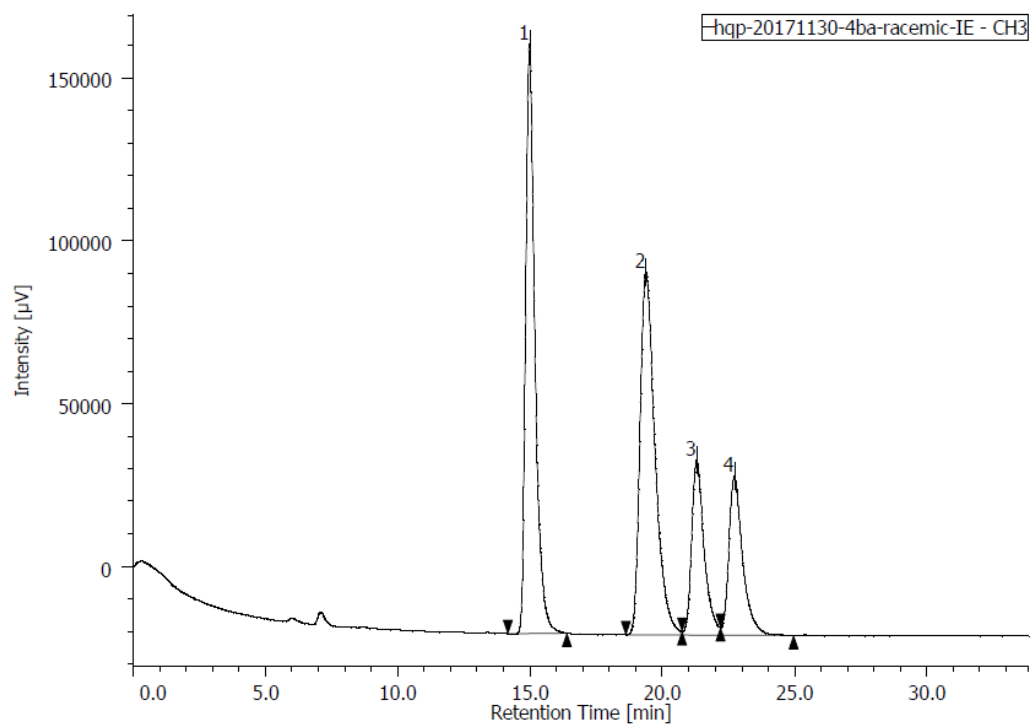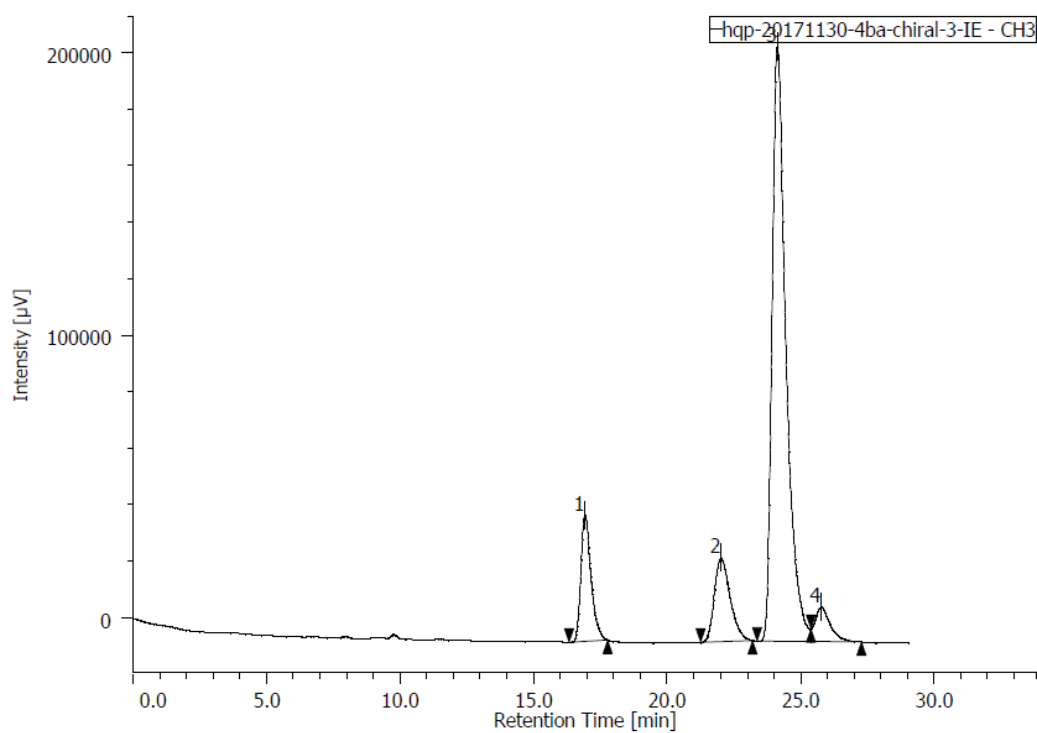

| Peak                 | 1    | 2    | 3    | 4    |
|----------------------|------|------|------|------|
| Retention Time (min) | 16.9 | 22.0 | 24.1 | 25.8 |
| Area (%)             | 11.2 | 11.6 | 72.5 | 4.7  |

Compound **4ca**

HPLC conditions: DAICEL Chiralpak AD-3 column, hexane/*i*-PrOH = 70/30, 254 nm, 1.0 mL/min, 40 °C,  $t_{\text{major}} = 6.08 \text{ min}$ ,  $t_{\text{minor}} = 8.10 \text{ min}$

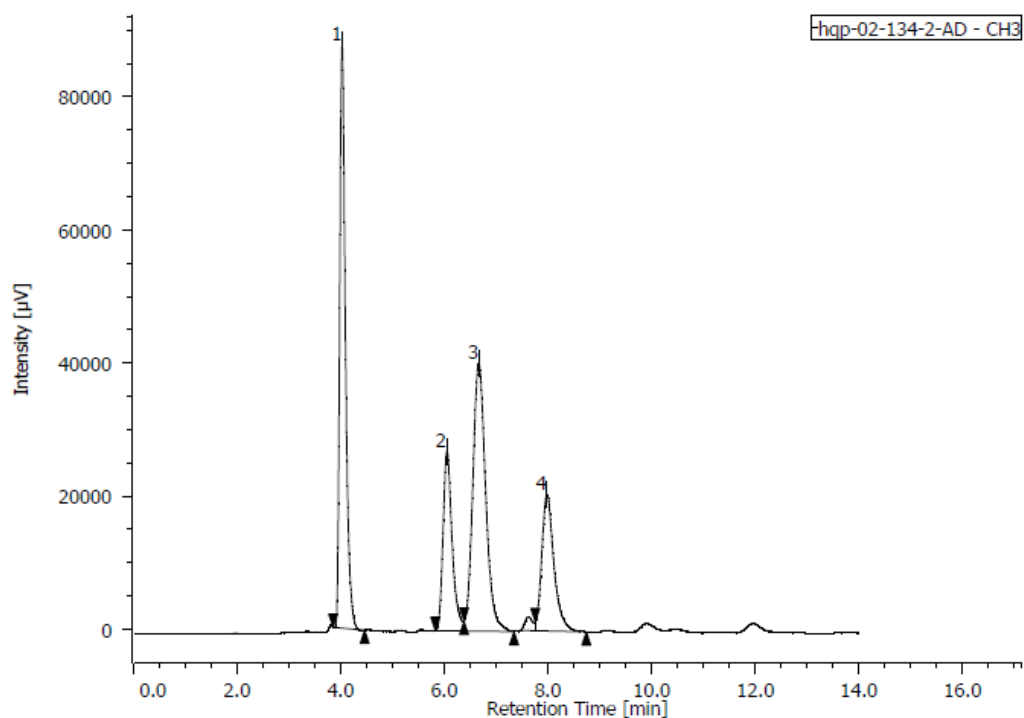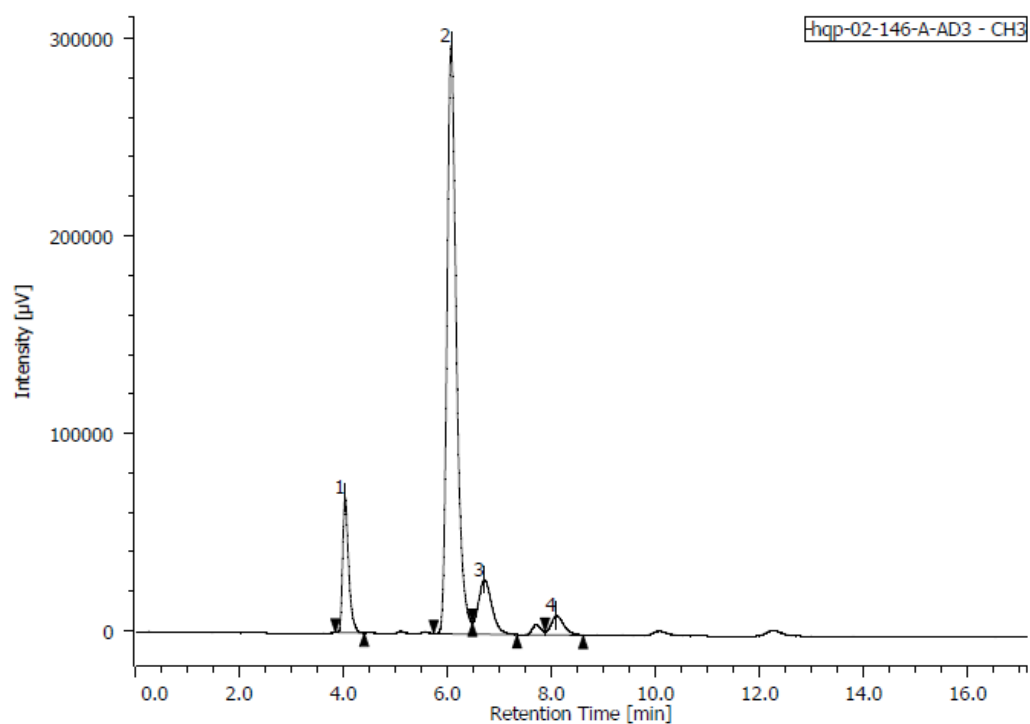

| Peak                 | 1    | 2    | 3    | 4    |
|----------------------|------|------|------|------|
| Retention Time (min) | 4.04 | 6.07 | 6.71 | 8.10 |
| Area (%)             | 11.1 | 75.5 | 10.1 | 3.3  |

Compound **4da**

HPLC conditions: DAICEL Chiralpak IA-3 column, hexane/*i*-PrOH = 70/30, 254 nm, 1.0 mL/min, 40 °C,  $t_{\text{major}} = 5.18 \text{ min}$ ,  $t_{\text{minor}} = 7.01 \text{ min}$ ;

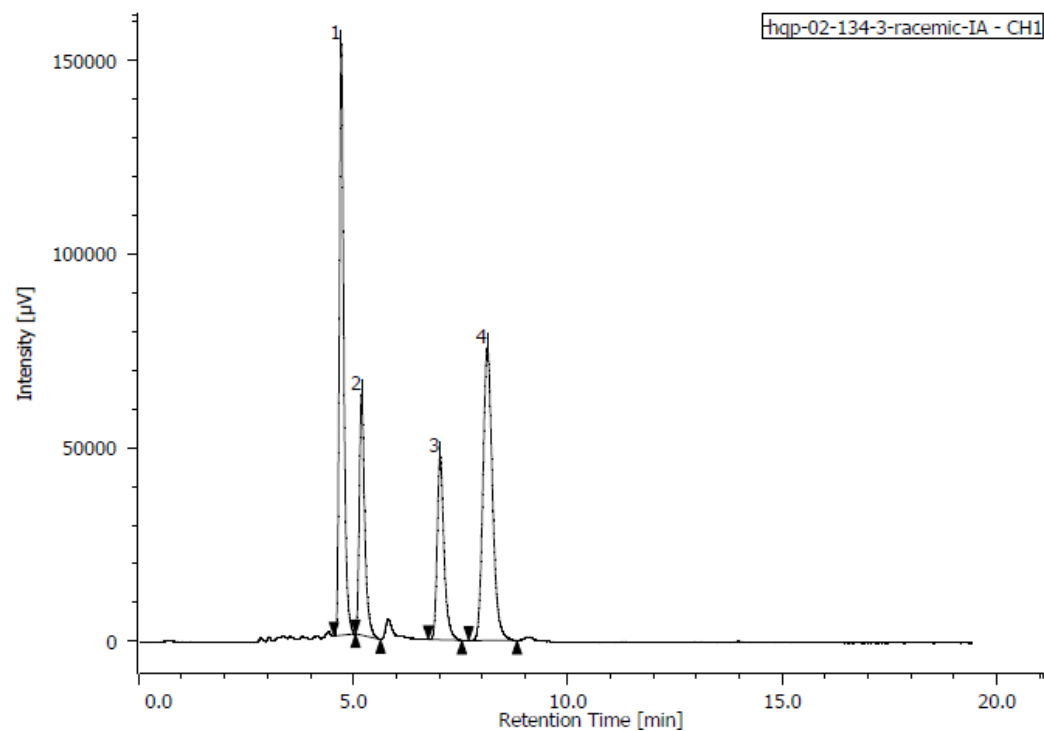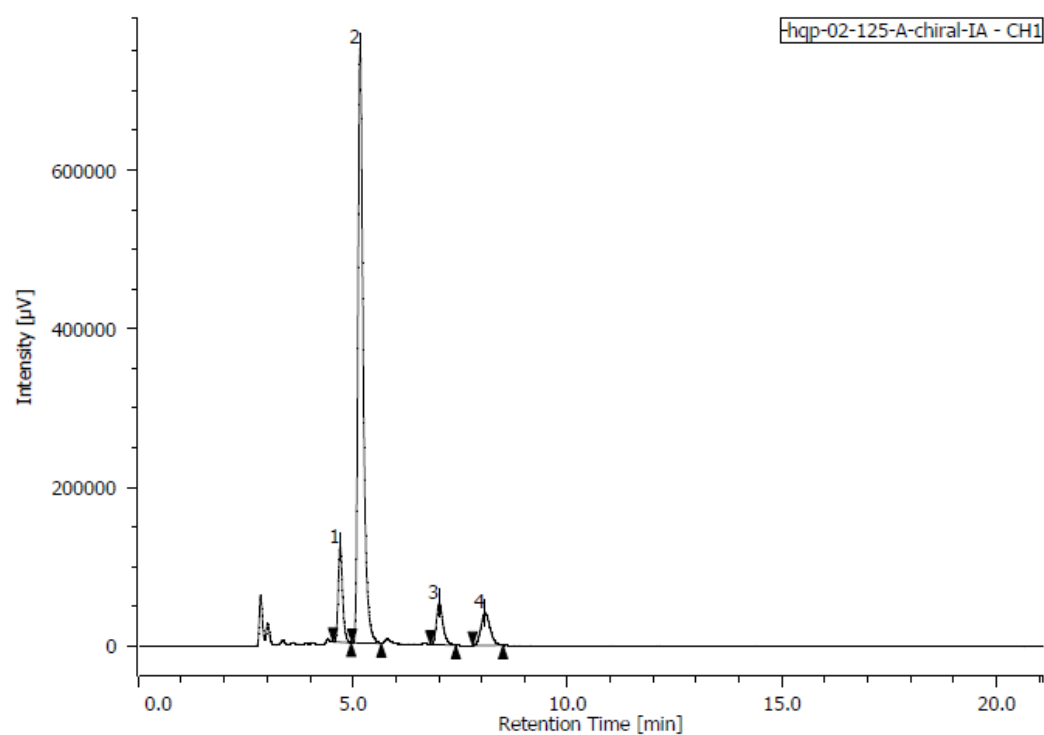

| Peak                 | 1    | 2    | 3    | 4    |
|----------------------|------|------|------|------|
| Retention Time (min) | 4.71 | 5.18 | 7.01 | 8.08 |
| Area (%)             | 10.0 | 76.1 | 6.7  | 7.2  |

Compound **4ea**

HPLC conditions: DAICEL Chiralpak AD-3 column, hexane/*i*-PrOH = 70/30, 254 nm, 1.0 mL/min, 40 °C,  $t_{\text{major}} = 6.76$  min,  $t_{\text{minor}} = 10.48$  min;

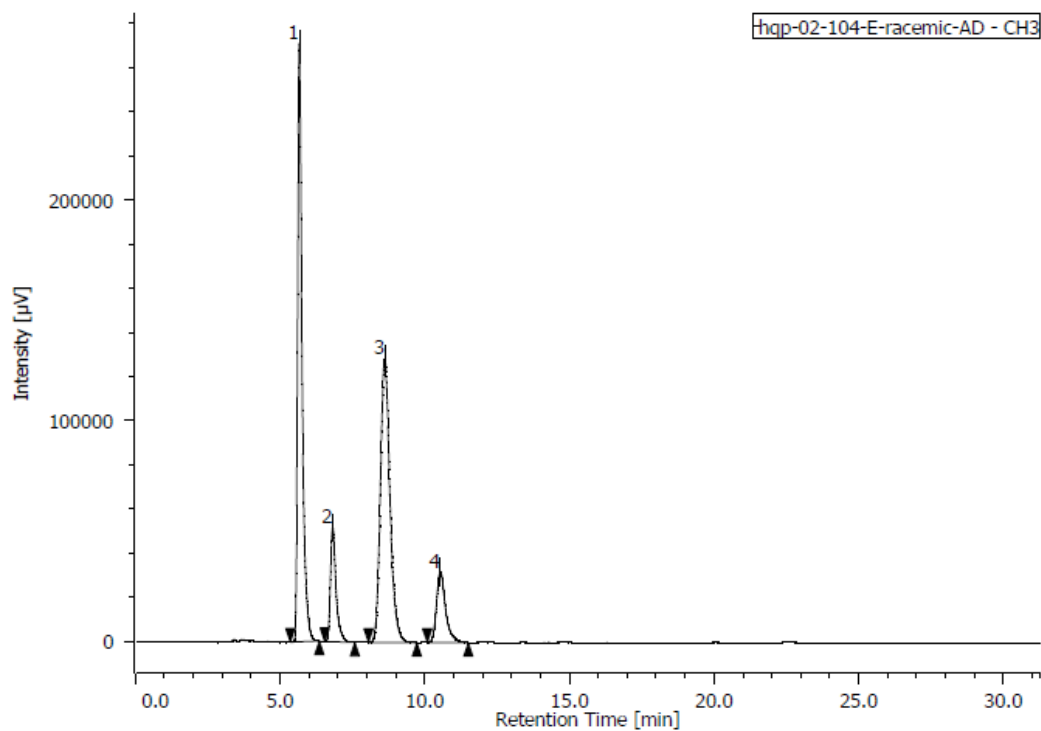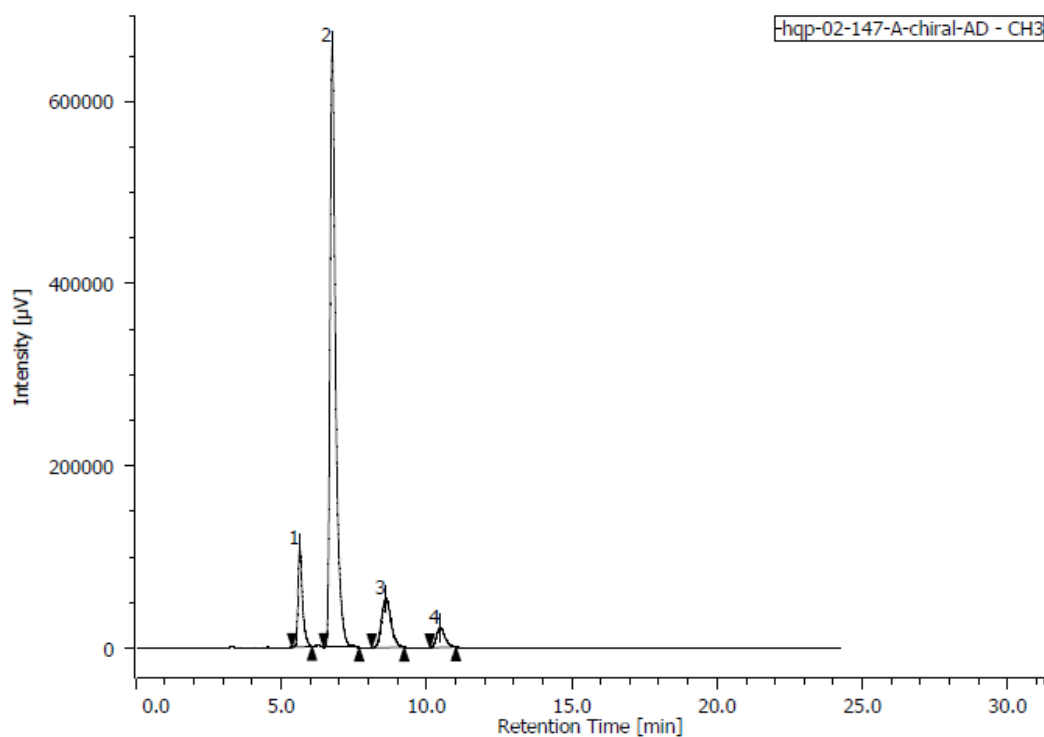

| Peak                 | 1    | 2    | 3    | 4     |
|----------------------|------|------|------|-------|
| Retention Time (min) | 5.64 | 6.76 | 8.61 | 10.48 |
| Area (%)             | 9.8  | 76.1 | 10.3 | 3.8   |

Compound **4fa**

HPLC conditions: DAICEL Chiralpak AD-3 column, hexane/*i*-PrOH = 70/30, 254 nm, 1.0 mL/min, 40 °C,  $t_{\text{major}} = 10.55$  min,  $t_{\text{minor}} = 18.00$  min;

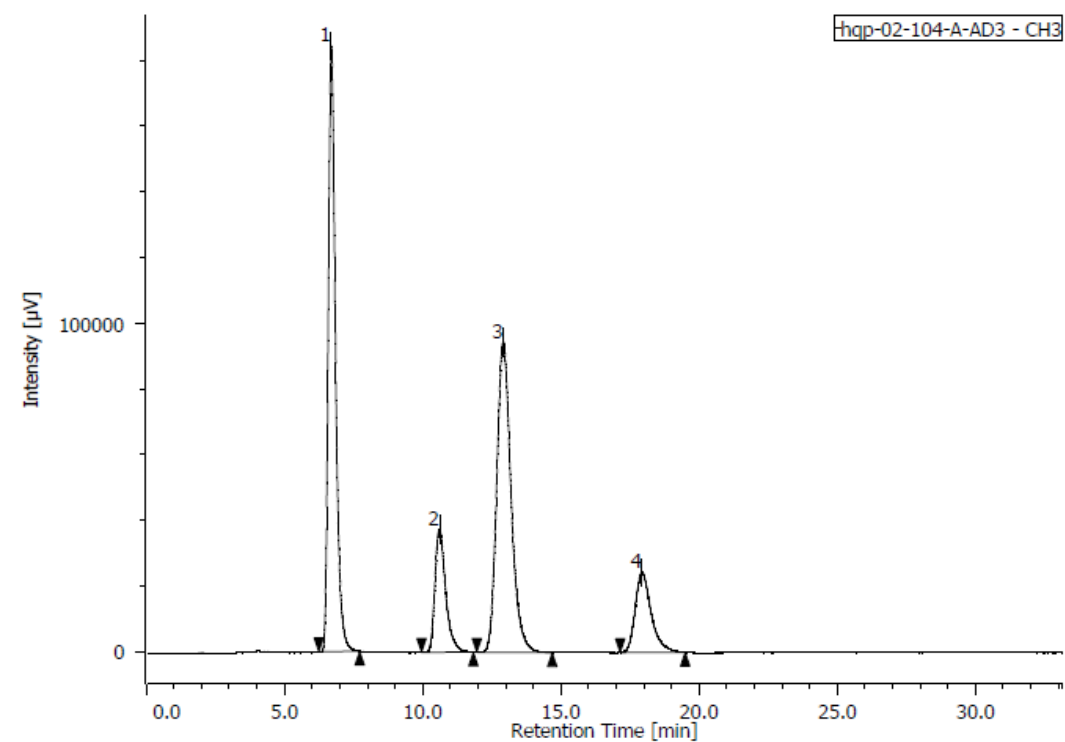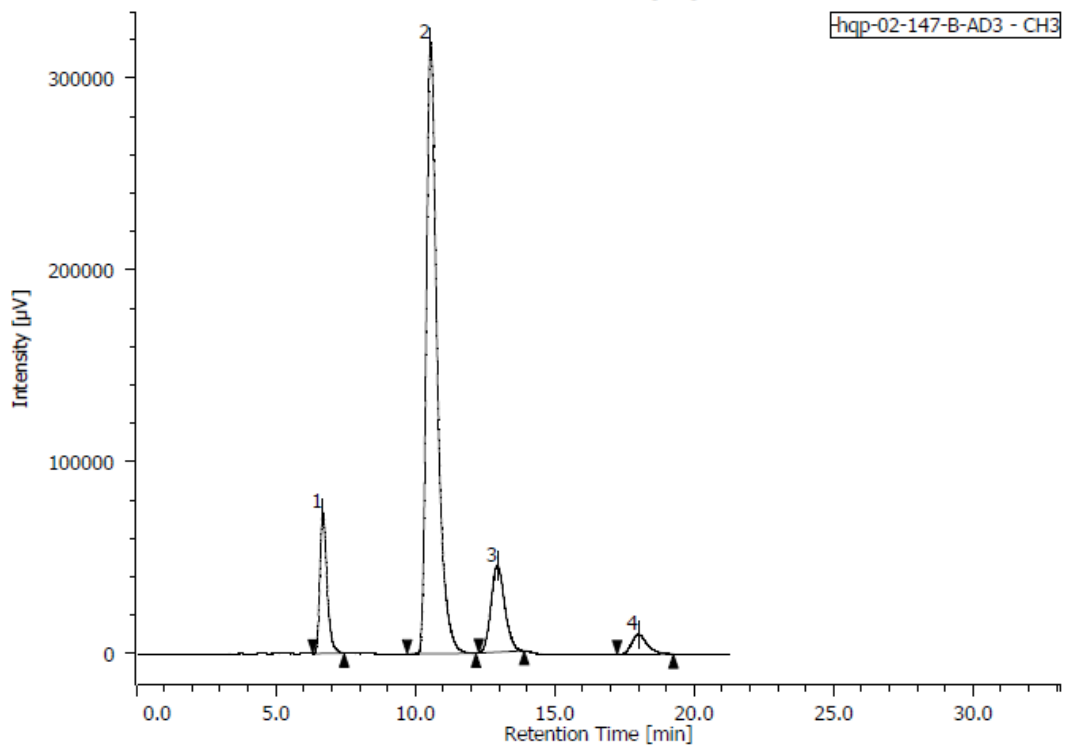

| Peak                 | 1    | 2     | 3     | 4     |
|----------------------|------|-------|-------|-------|
| Retention Time (min) | 6.68 | 10.55 | 12.94 | 18.00 |
| Area (%)             | 11.1 | 72.1  | 13.2  | 3.6   |

Compound **4ga**

HPLC conditions: DAICEL Chiralpak AD-3 column, hexane/*i*-PrOH = 70/30, 254 nm, 1.0 mL/min, 40 °C,  $t_{\text{major}} = 6.58 \text{ min}$ ,  $t_{\text{minor}} = 9.39 \text{ min}$ ;

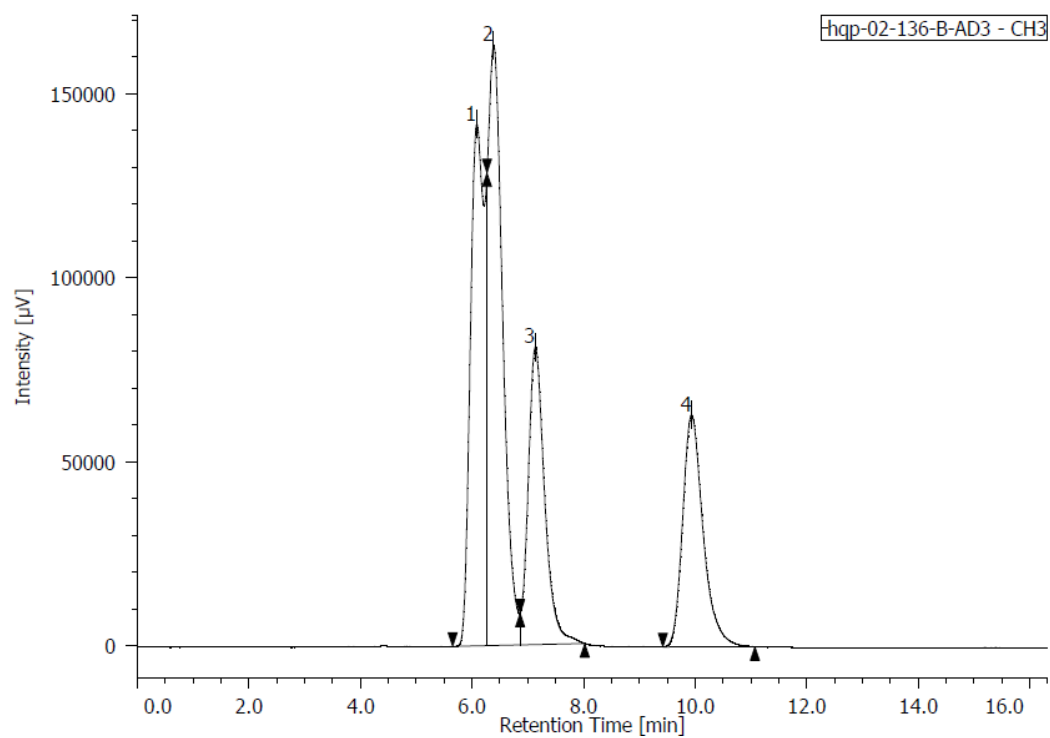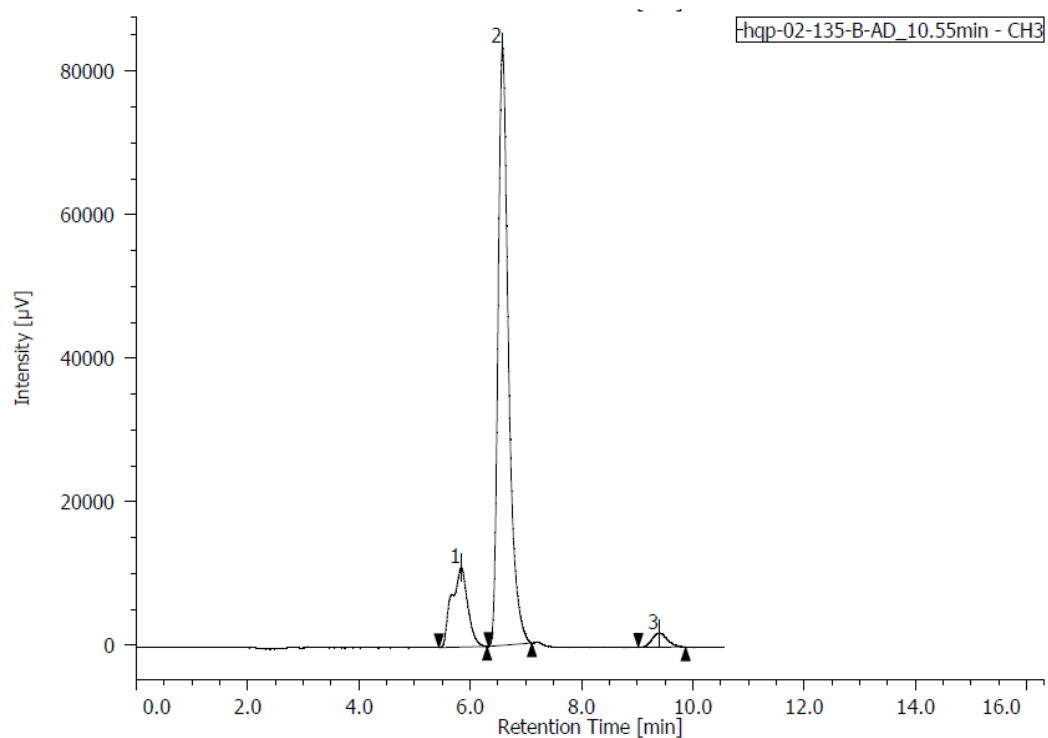

| Peak                 | 1+2  | 3    | 4    |
|----------------------|------|------|------|
| Retention Time (min) | 5.83 | 6.58 | 9.39 |
| Area (%)             | 16.5 | 80.7 | 2.8  |



Compound **4ha**

HPLC conditions: DAICEL Chiralpak AD-3 column, hexane/*i*-PrOH = 70/30, 254 nm, 1.0 mL/min, 40 °C,  $t_{\text{major}} = 5.49 \text{ min}$ ,  $t_{\text{minor}} = 6.91 \text{ min}$ ;

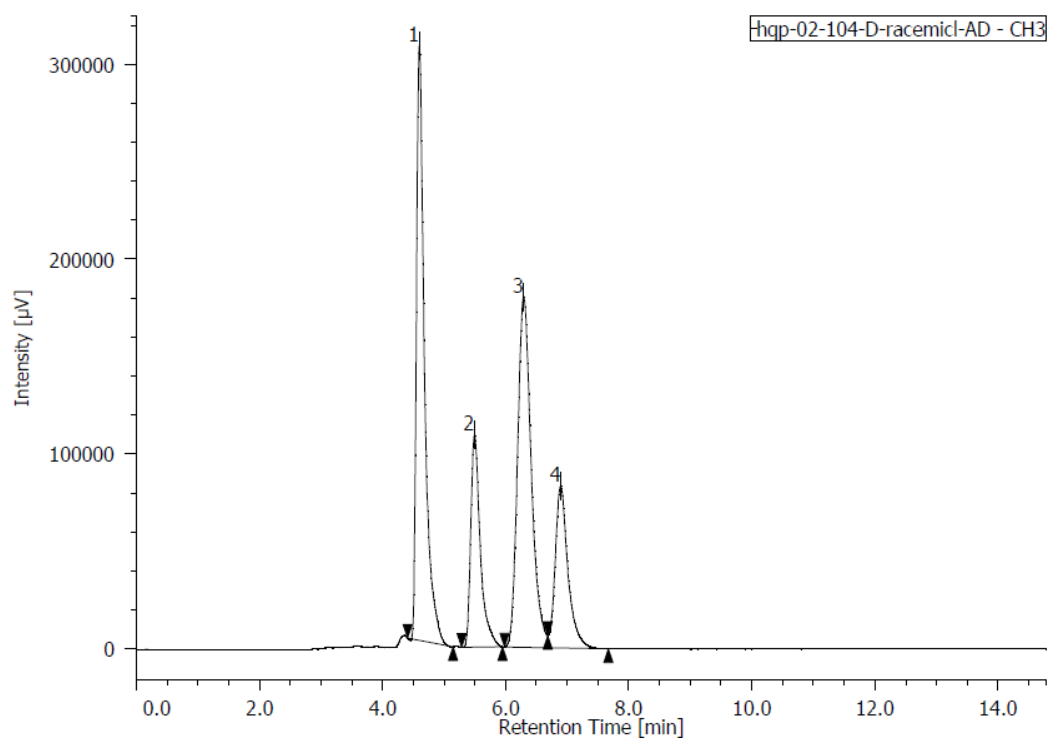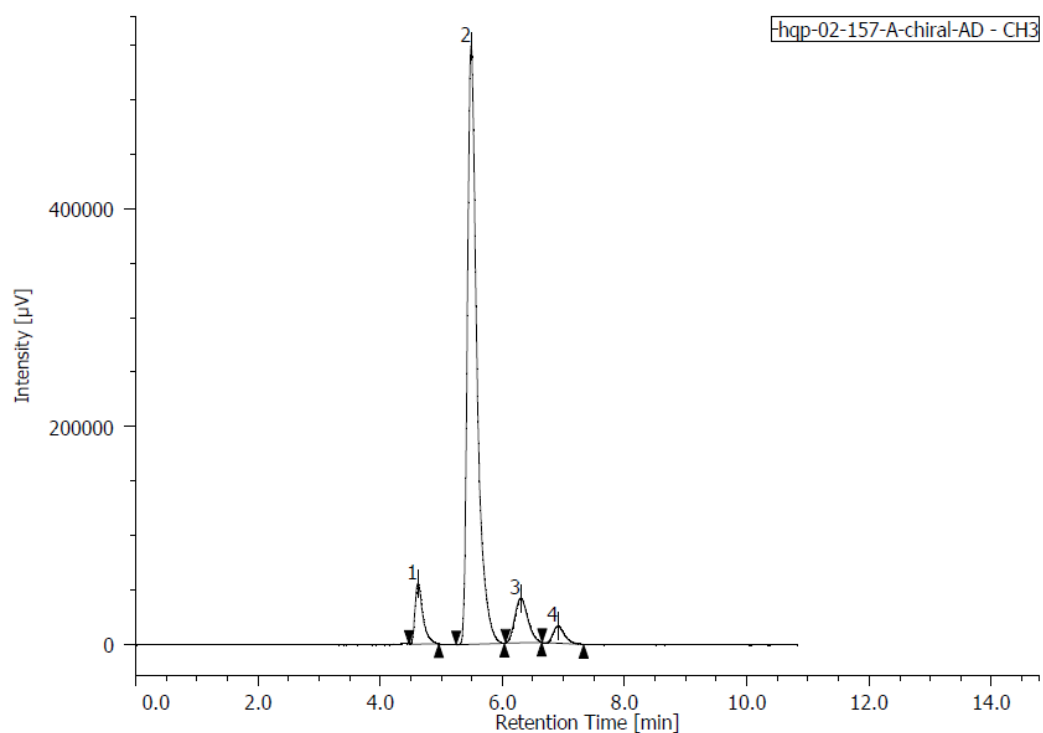

| Peak                 | 1    | 2    | 3    | 4    |
|----------------------|------|------|------|------|
| Retention Time (min) | 4.62 | 5.49 | 6.30 | 6.91 |
| Area (%)             | 6.8  | 82.1 | 8.3  | 2.8  |

Compound **4ia**

HPLC conditions: DAICEL Chiralpak AD-3 column, hexane/*i*-PrOH = 80/20, 254 nm, 0.8 mL/min, 40 °C,  $t_{\text{major}} = 8.88$  min,  $t_{\text{minor}} = 12.52$  min;

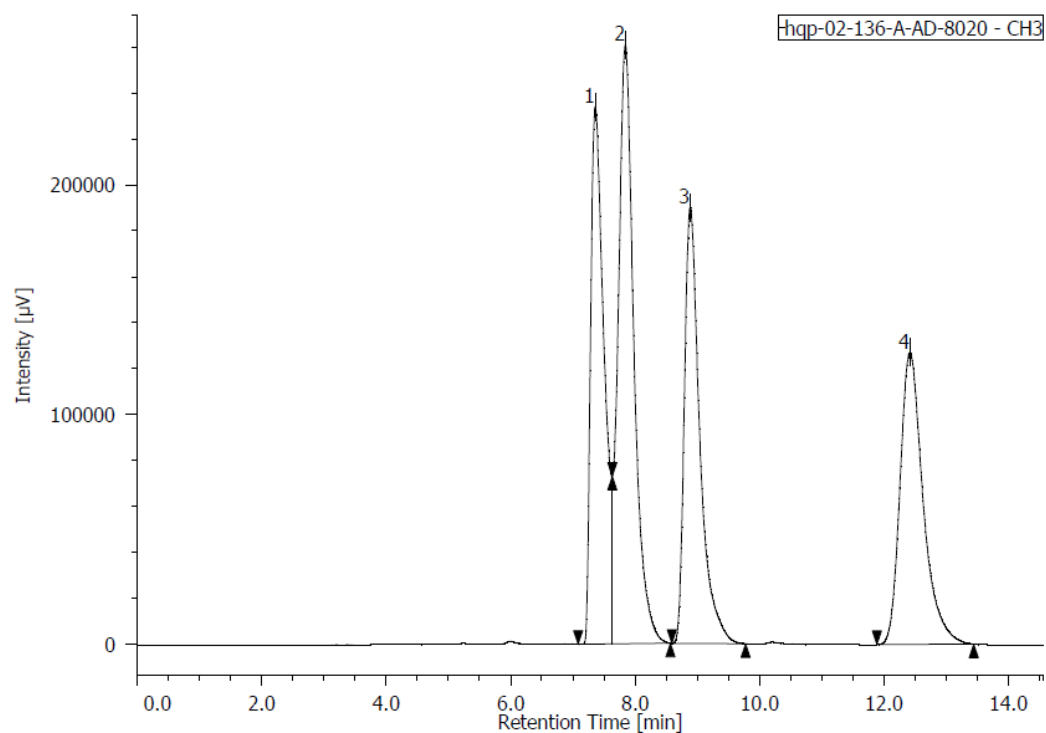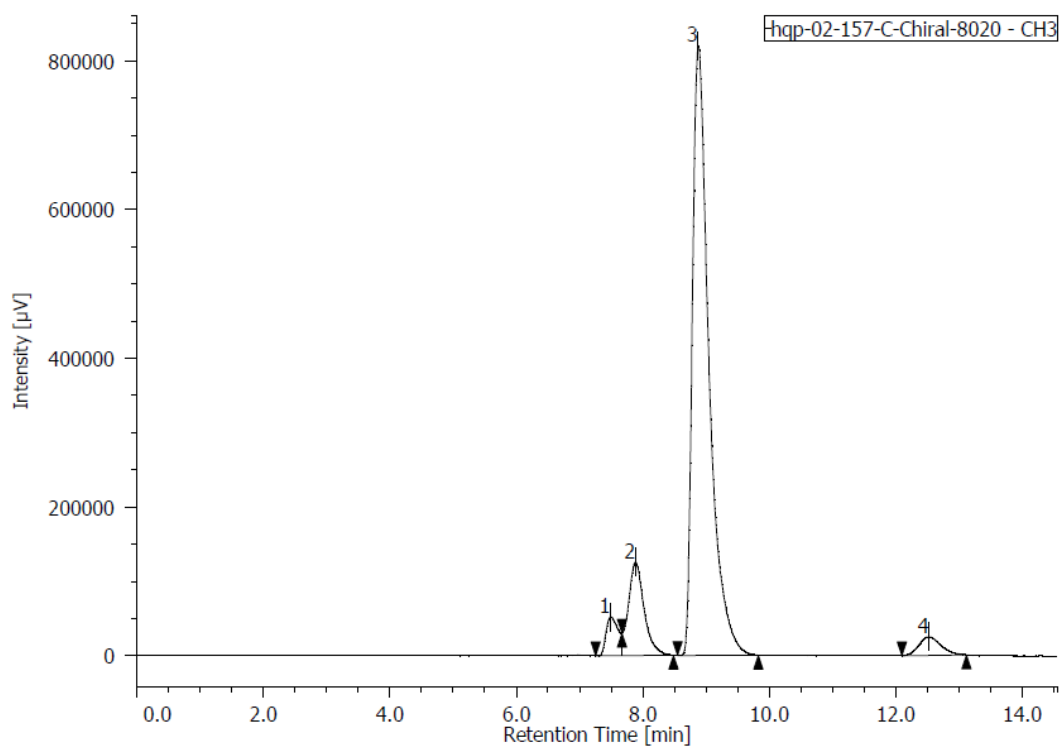

| Peak                 | 1    | 2    | 3    | 4     |
|----------------------|------|------|------|-------|
| Retention Time (min) | 7.49 | 7.88 | 8.88 | 12.52 |
| Area (%)             | 3.8  | 11.8 | 81.1 | 3.3   |

Compound **4ja**

HPLC conditions: DAICEL Chiralpak OD-3 column, hexane/*i*-PrOH = 80/20, 254 nm, 1.0 mL/min, 40 °C,  $t_{\text{major}} = 5.55 \text{ min}$ ,  $t_{\text{minor}} = 6.79 \text{ min}$ ;

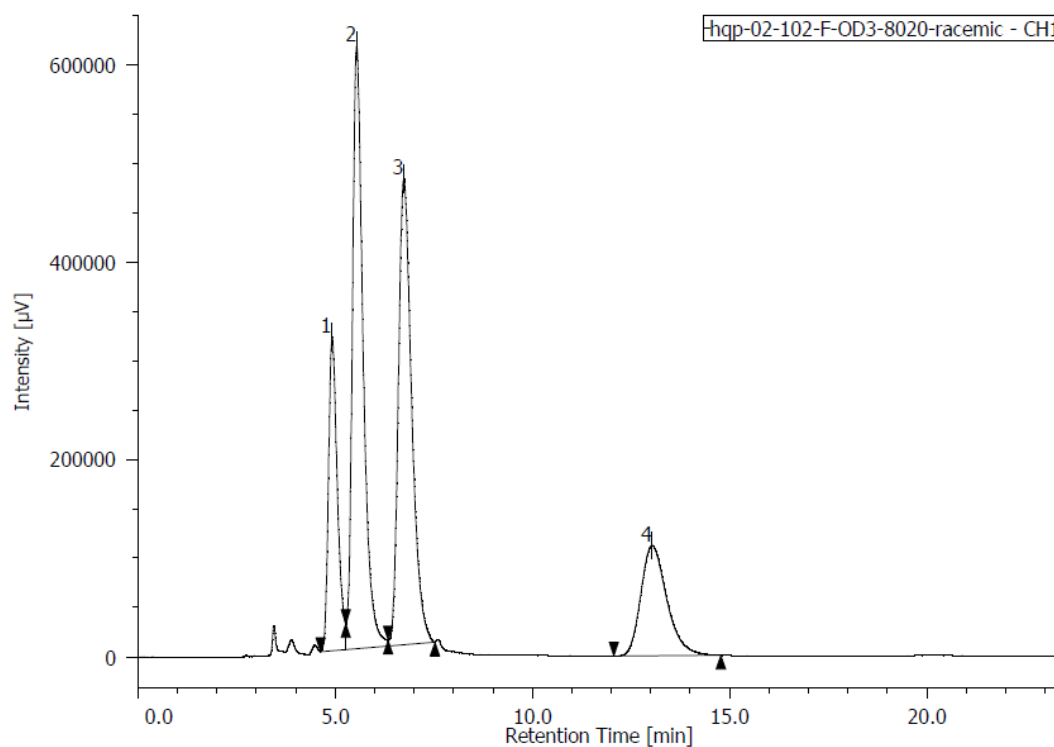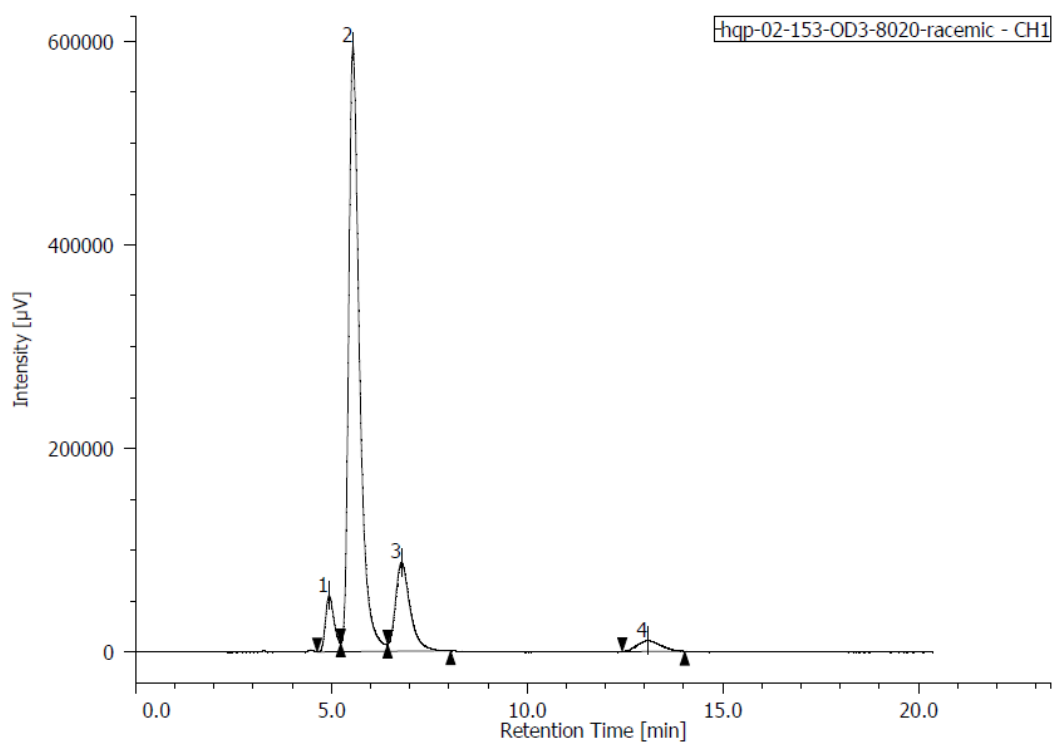

| Peak                 | 1    | 2    | 3    | 4     |
|----------------------|------|------|------|-------|
| Retention Time (min) | 4.94 | 5.55 | 6.79 | 13.08 |
| Area (%)             | 5.7  | 76.2 | 15.1 | 3.0   |

Compound **4ka**

HPLC conditions: DAICEL Chiralpak AD-3 column, hexane/*i*-PrOH = 70/30, 254 nm, 1.0 mL/min, 40 °C,  $t_{\text{major}} = 9.06$  min,  $t_{\text{minor}} = 14.25$  min;

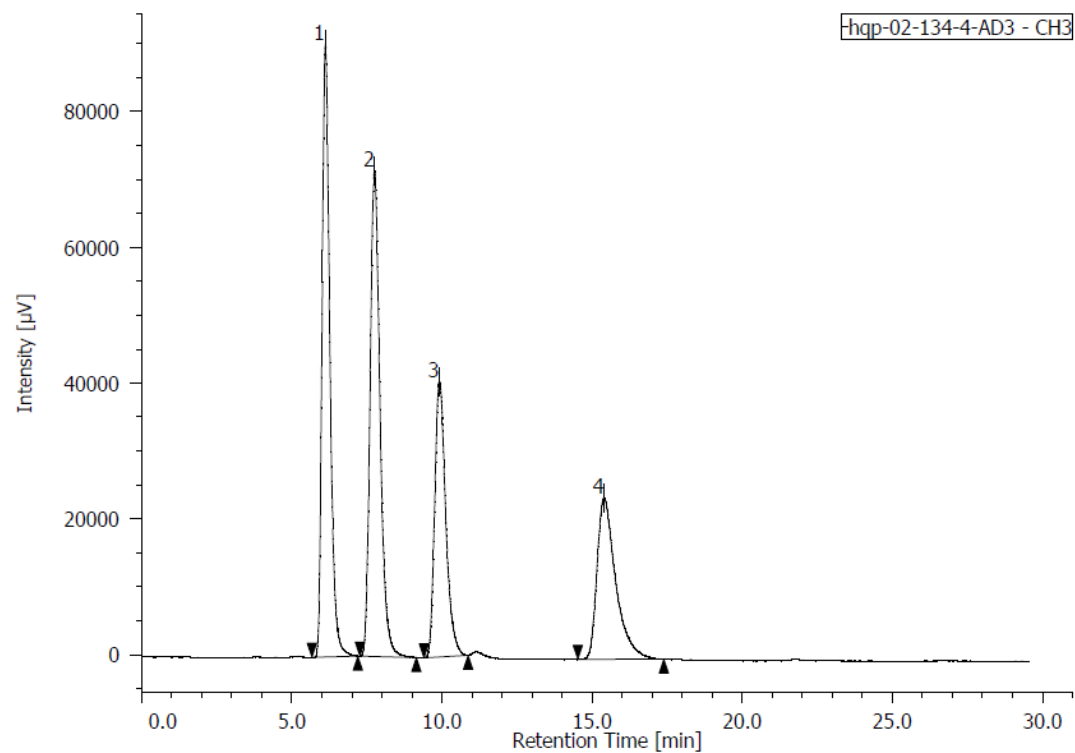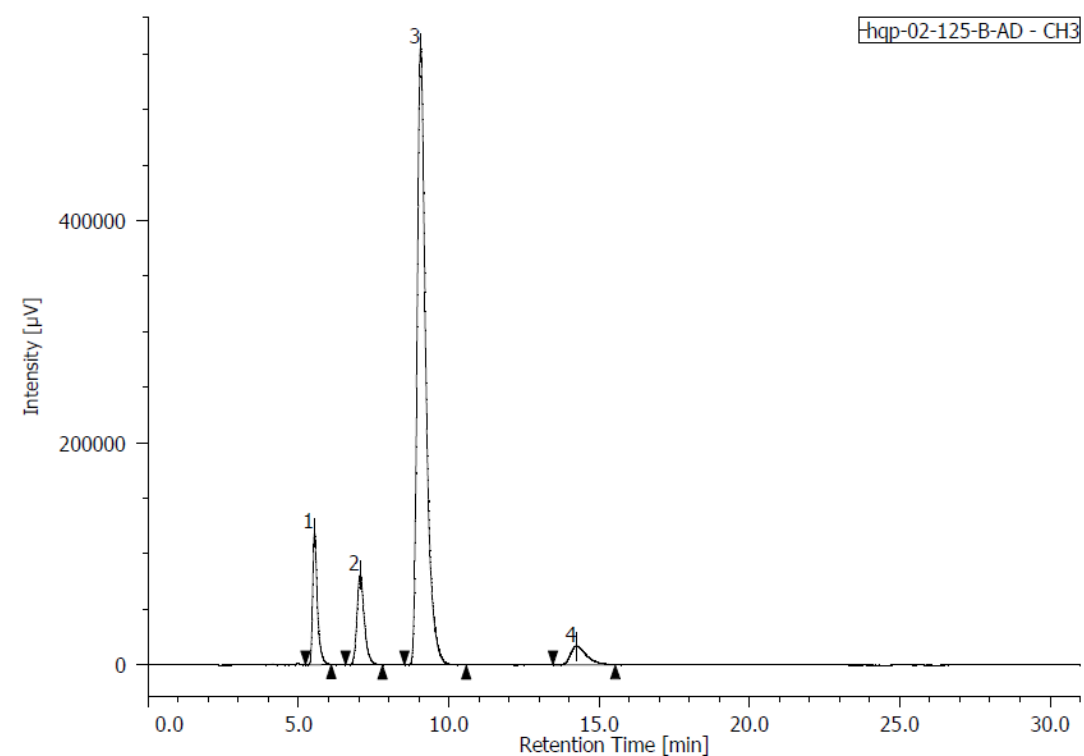

| Peak                 | 1    | 2    | 3    | 4    |
|----------------------|------|------|------|------|
| Retention Time (min) | 5.53 | 7.05 | 9.06 | 14.3 |
| Area (%)             | 9.0  | 9.5  | 77.1 | 4.4  |

Compound **4la**

HPLC conditions: DAICEL Chiralpak AD-3 column, hexane/*i*-PrOH = 70/30, 254 nm, 1.0 mL/min, 40 °C,  $t_{\text{major}} = 7.29$  min,  $t_{\text{minor}} = 10.62$  min;

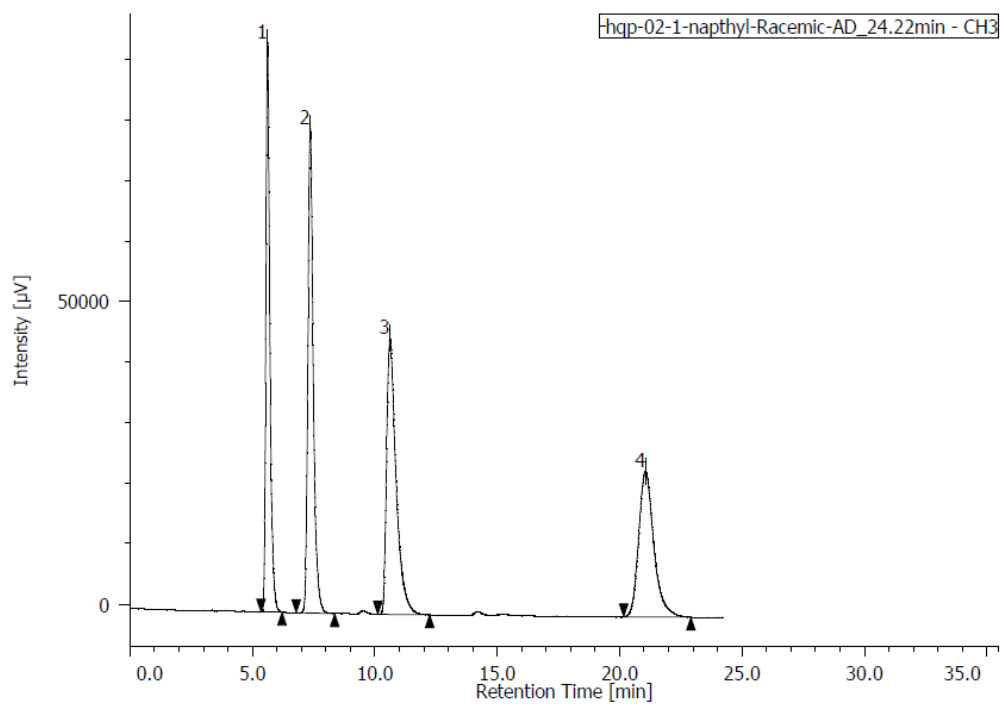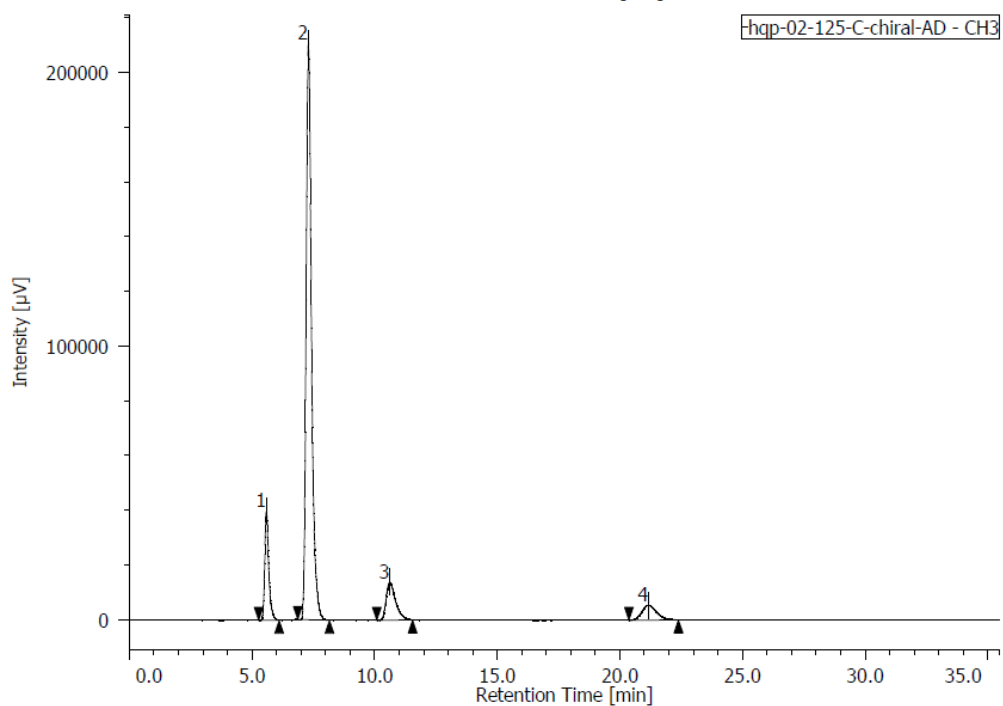

| Peak                 | 1    | 2    | 3     | 4     |
|----------------------|------|------|-------|-------|
| Retention Time (min) | 5.59 | 7.29 | 10.62 | 21.16 |
| Area (%)             | 10.5 | 75.5 | 8.6   | 6.4   |

Compound **4ma**

HPLC conditions: DAICEL Chiralpak IA-3 column, hexane/*i*-PrOH = 70/30, 254 nm, 0.5 mL/min, 30 °C,  $t_{\text{major}} = 18.38$  min,  $t_{\text{minor}} = 25.98$  min;

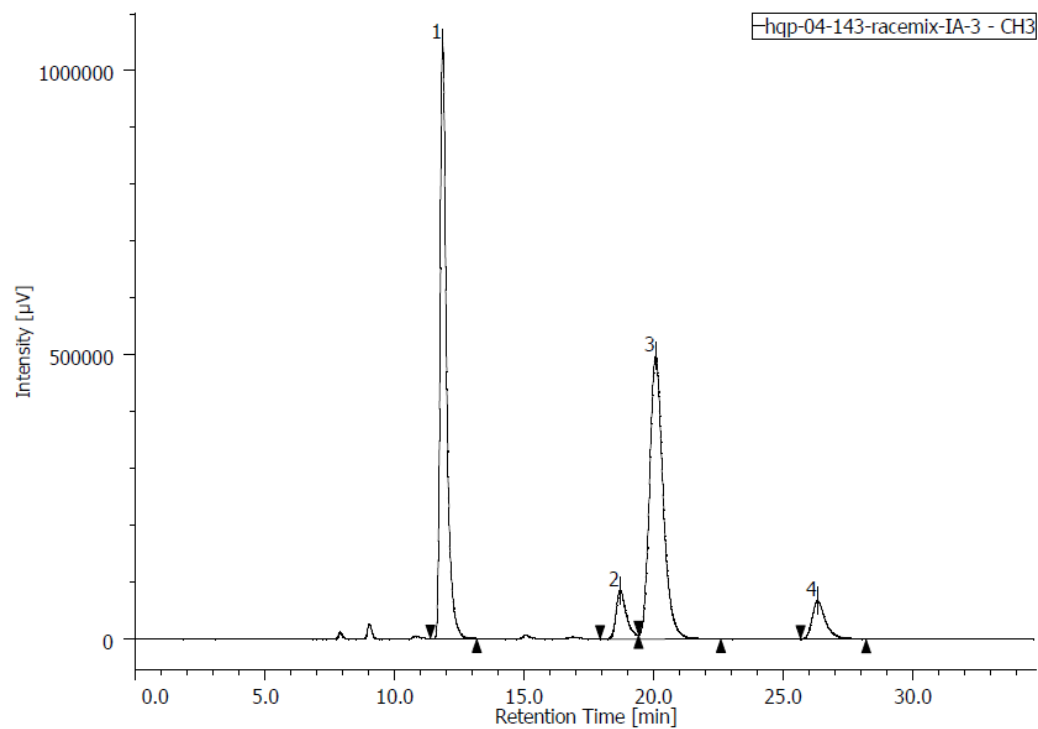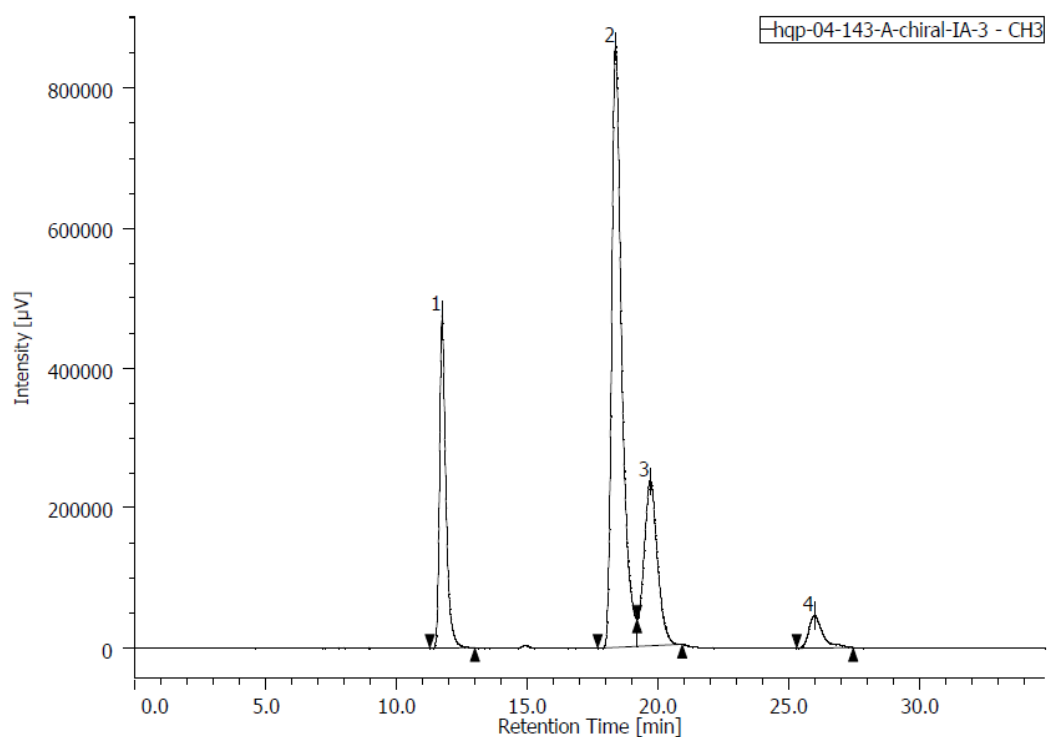

| Peak                 | 1     | 2     | 3     | 4     |
|----------------------|-------|-------|-------|-------|
| Retention Time (min) | 11.74 | 18.38 | 19.70 | 25.98 |
| Area (%)             | 19.4  | 55.9  | 20.6  | 4.2   |

Compound **4na**

HPLC conditions: DAICEL Chiralpak AD-3 column, hexane/*i*-PrOH = 70/30, 254 nm, 1.0 mL/min, 40 °C,  $t_{\text{major}} = 5.64 \text{ min}$ ,  $t_{\text{minor}} = 7.73 \text{ min}$ ;

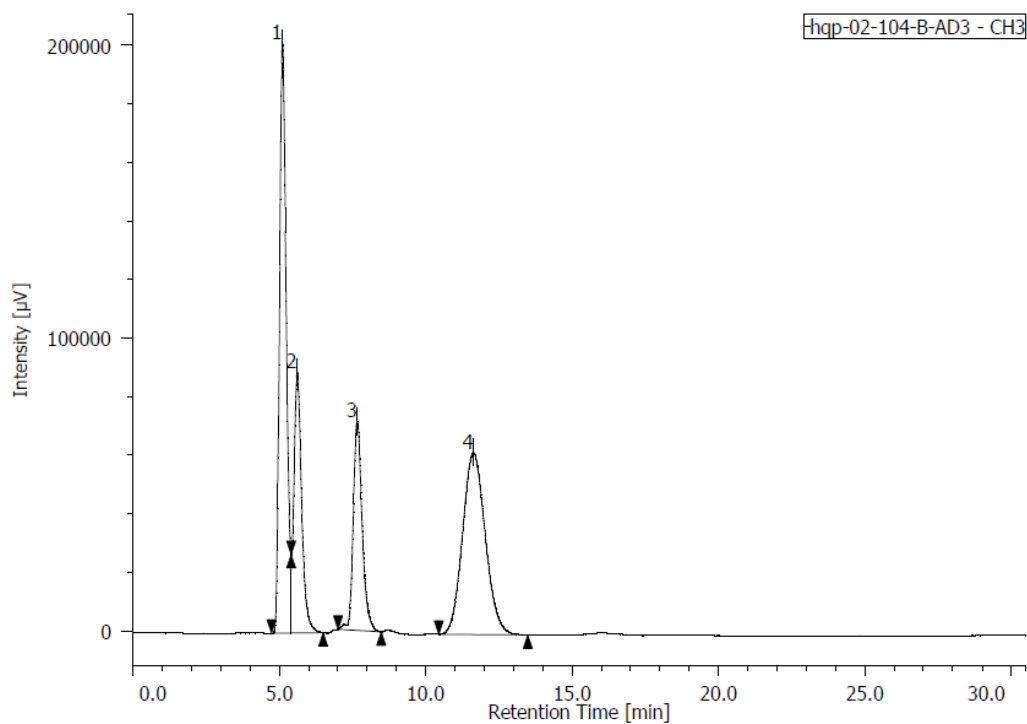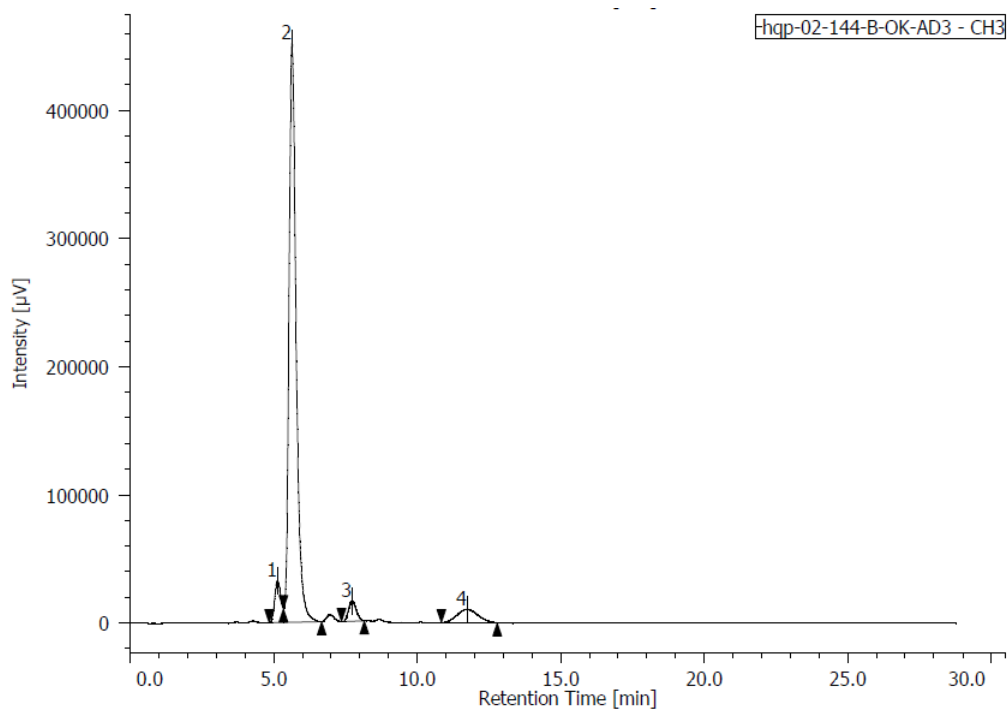

| Peak                 | 1    | 2    | 3    | 4     |
|----------------------|------|------|------|-------|
| Retention Time (min) | 5.13 | 5.64 | 7.73 | 11.74 |
| Area (%)             | 5.4  | 85.5 | 3.2  | 5.9   |

Compound **4ab**

HPLC conditions: DAICEL Chiralpak AD-3 column, hexane/*i*-PrOH = 70/30, 254 nm, 1.0 mL/min, 40 °C,  $t_{\text{major}} = 6.23$  min,  $t_{\text{minor}} = 8.78$  min;

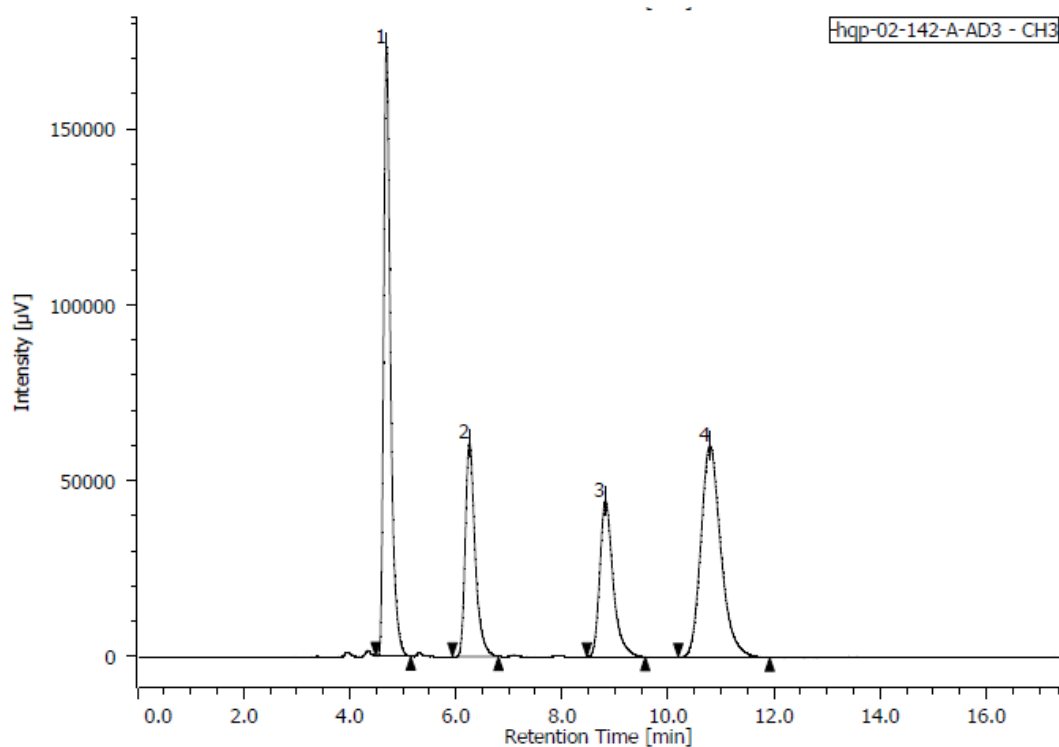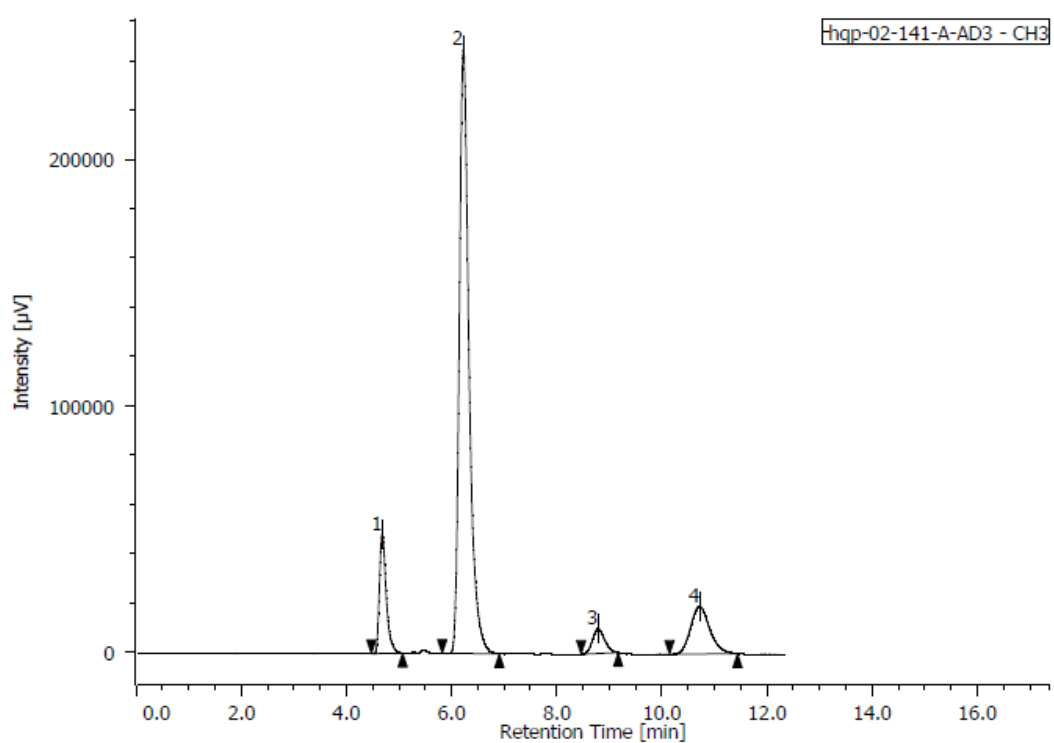

| Peak                 | 1    | 2    | 3    | 4     |
|----------------------|------|------|------|-------|
| Retention Time (min) | 4.68 | 6.23 | 8.78 | 10.72 |
| Area (%)             | 10.3 | 74.3 | 3.8  | 11.6  |



Compound **4ac**

HPLC conditions: DAICEL Chiralpak AD-3 column, hexane/*i*-PrOH = 70/30, 254 nm, 1.0 mL/min, 40 °C,  $t_{\text{major}} = 5.13$  min,  $t_{\text{minor}} = 6.78$  min;

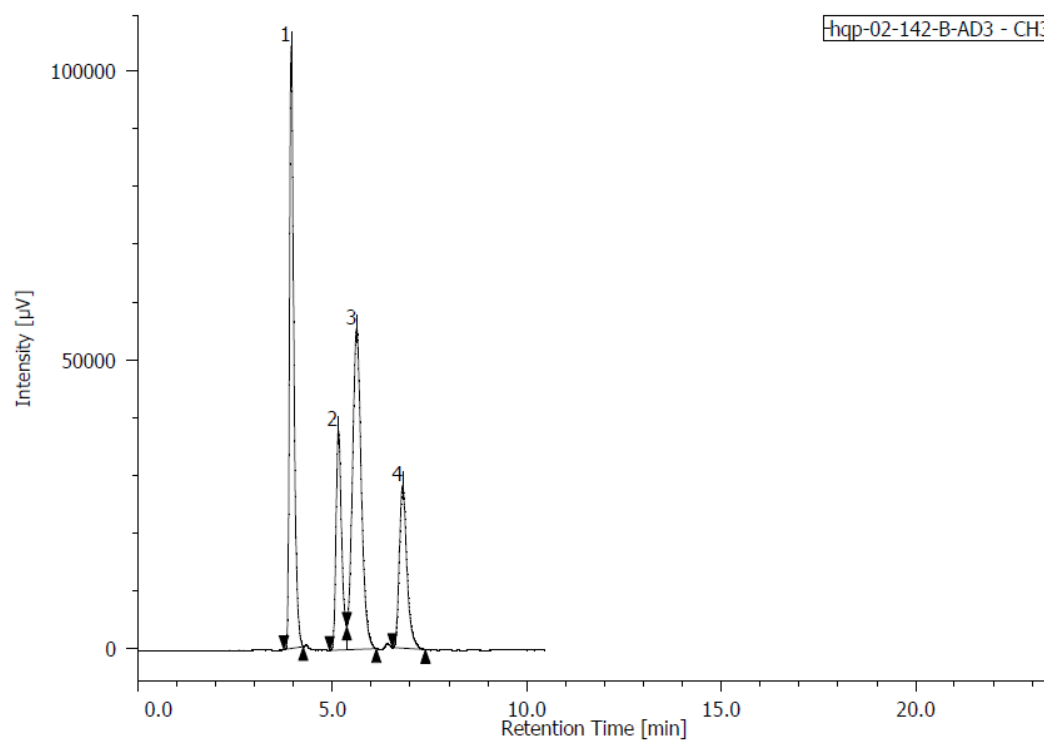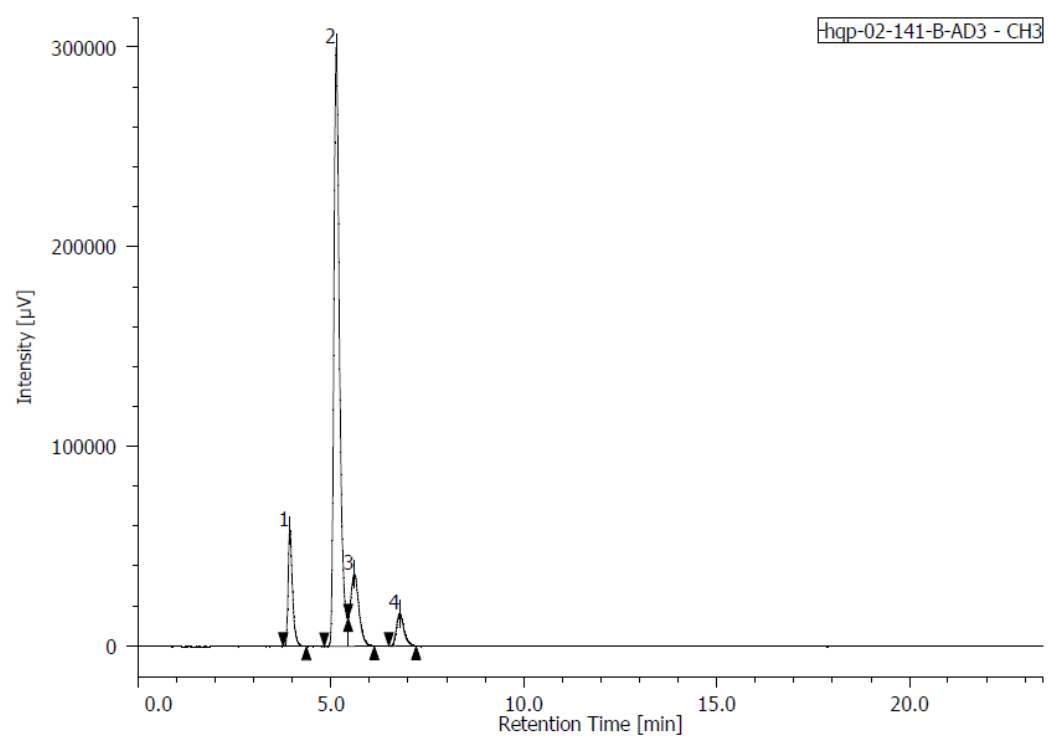

| Peak                 | 1    | 2    | 3    | 4    |
|----------------------|------|------|------|------|
| Retention Time (min) | 3.93 | 5.13 | 5.61 | 6.78 |
| Area (%)             | 10.6 | 71.5 | 12.8 | 5.1  |

Compound **4ad**

HPLC conditions: DAICEL Chiralpak AD-3 column, hexane/*i*-PrOH = 70/30, 254 nm, 1.0 mL/min, 40 °C,  $t_{\text{major}} = 5.83 \text{ min}$ ,  $t_{\text{minor}} = 11.57 \text{ min}$ ;

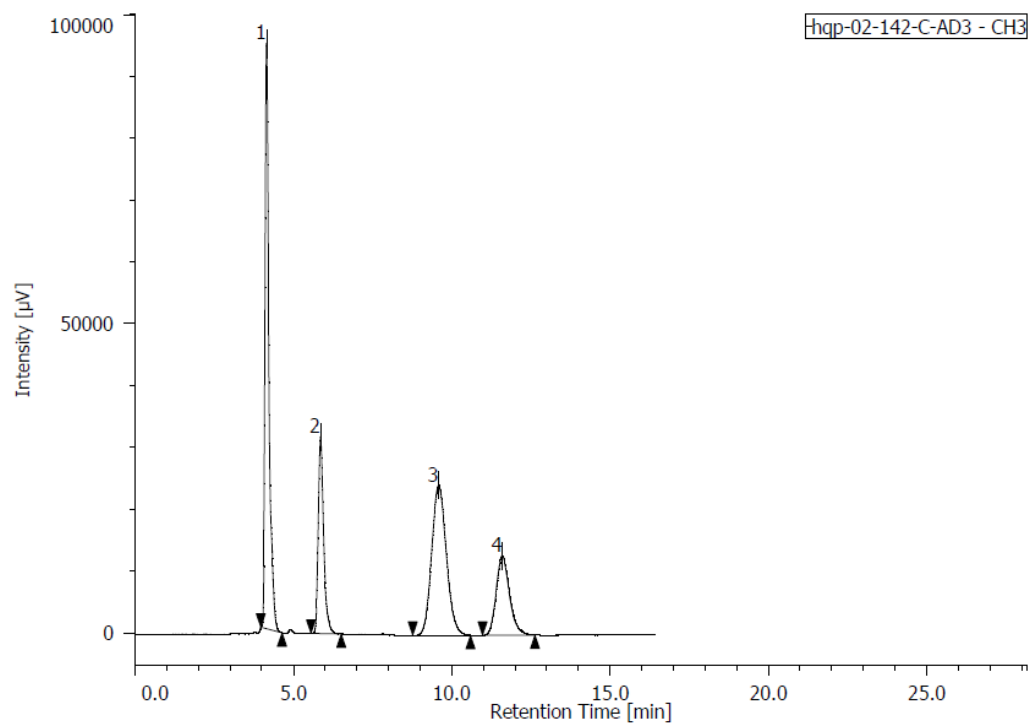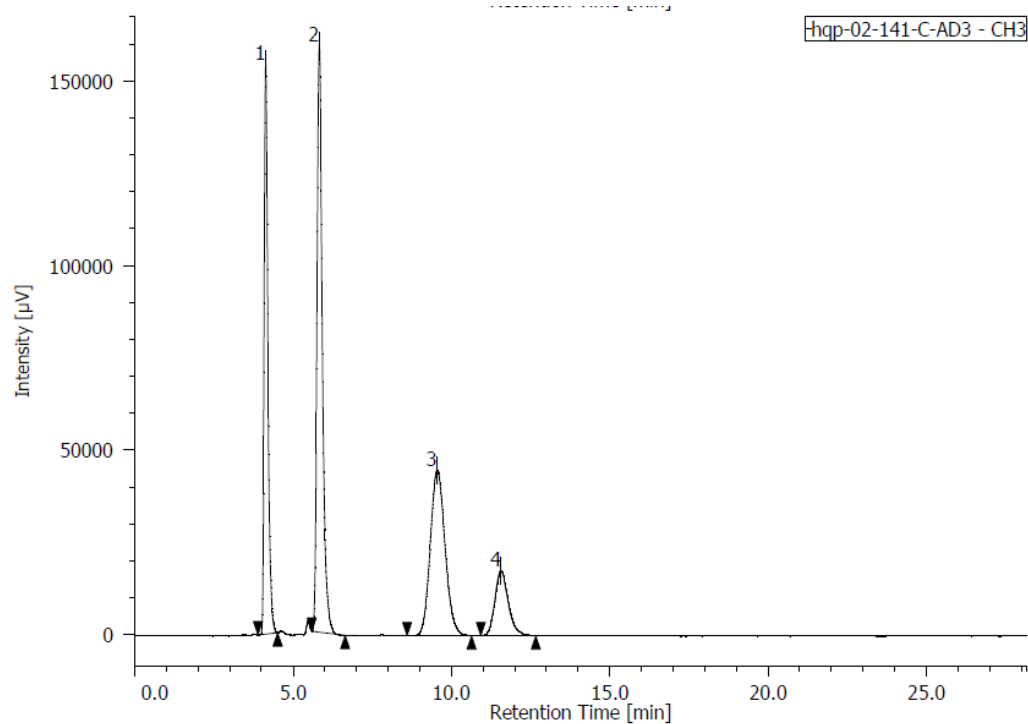

| Peak                 | 1    | 2    | 3    | 4     |
|----------------------|------|------|------|-------|
| Retention Time (min) | 4.14 | 5.83 | 9.55 | 11.57 |
| Area (%)             | 24.7 | 36.6 | 28.6 | 10.1  |

Compound **4ae**

HPLC conditions: DAICEL Chiralpak AD-3 column, hexane/*i*-PrOH = 70/30, 254 nm, 1.0 mL/min, 40 °C,  $t_{\text{major}} = 7.50$  min,  $t_{\text{minor}} = 13.00$  min;

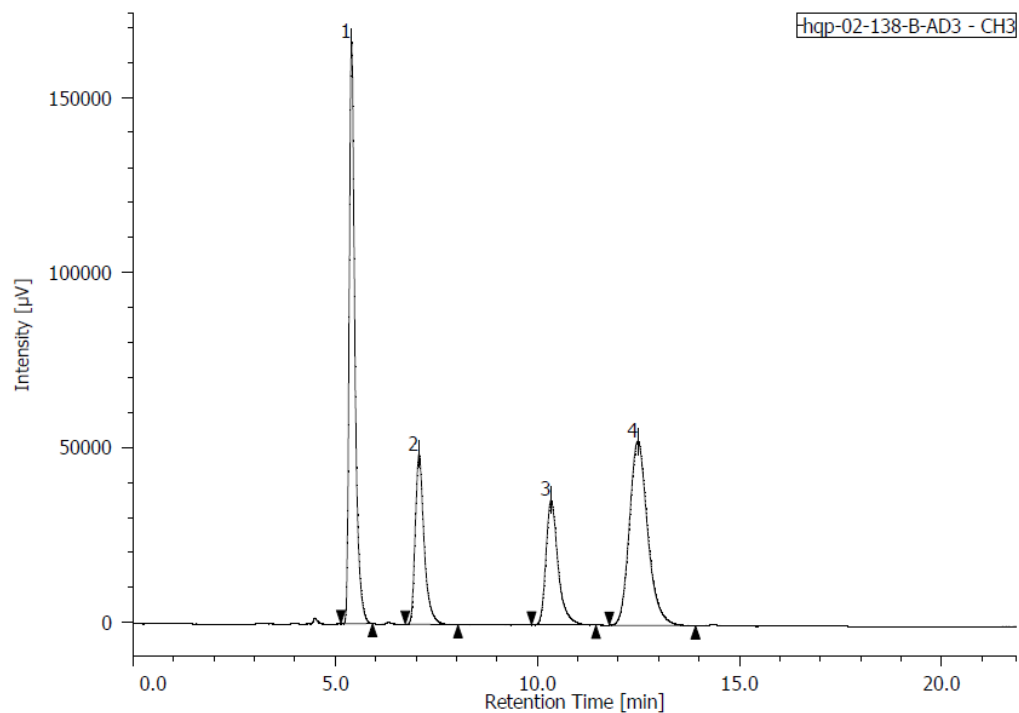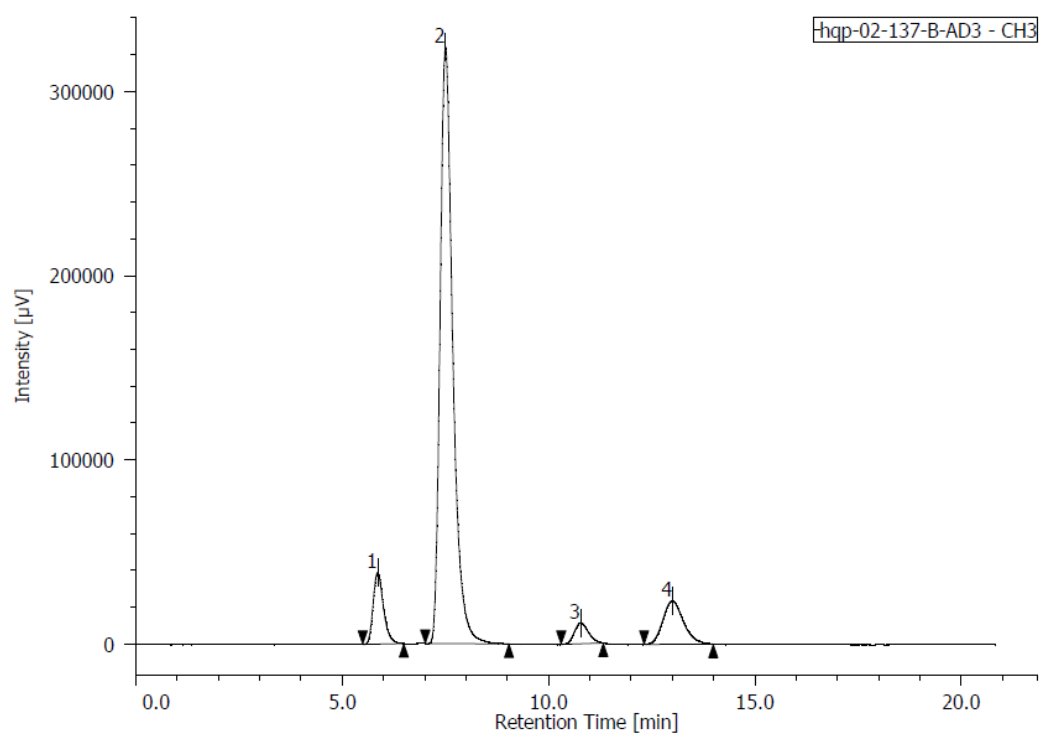

| Peak                 | 1    | 2    | 3     | 4     |
|----------------------|------|------|-------|-------|
| Retention Time (min) | 5.86 | 7.50 | 10.78 | 13.00 |
| Area (%)             | 7.8  | 79.7 | 3.1   | 9.4   |

Compound **4af**

HPLC conditions: DAICEL Chiralpak AD-3 column, hexane/*i*-PrOH = 70/30, 254 nm, 1.0 mL/min, 40 °C,  $t_{\text{major}} = 6.59$  min,  $t_{\text{minor}} = 11.52$  min;

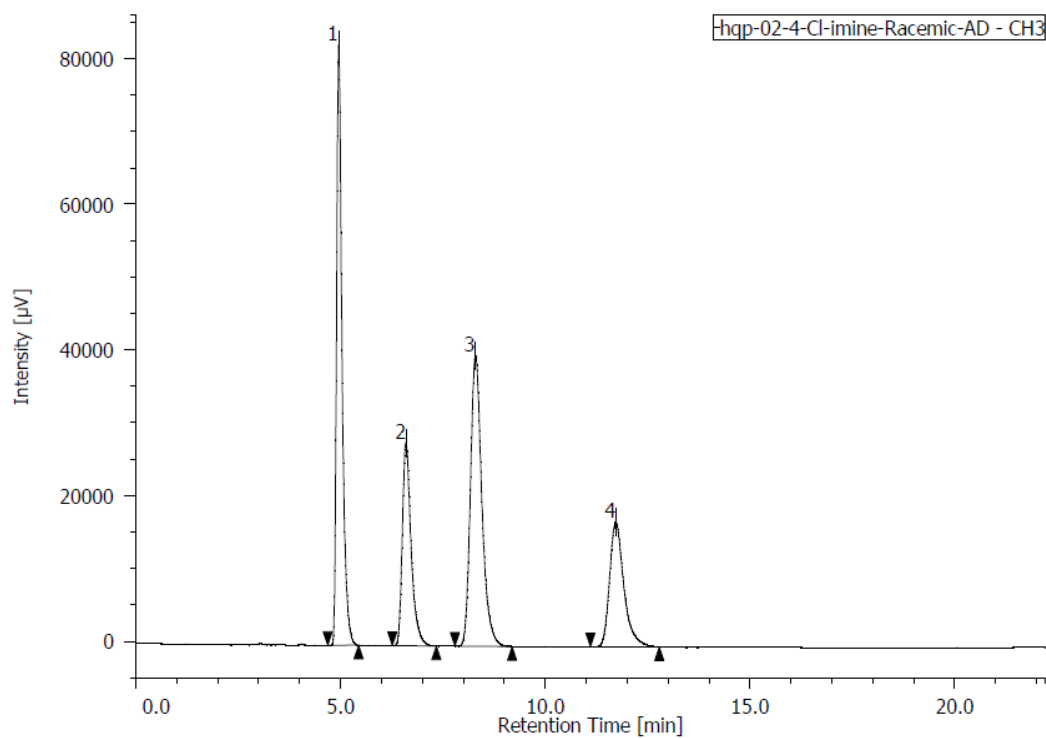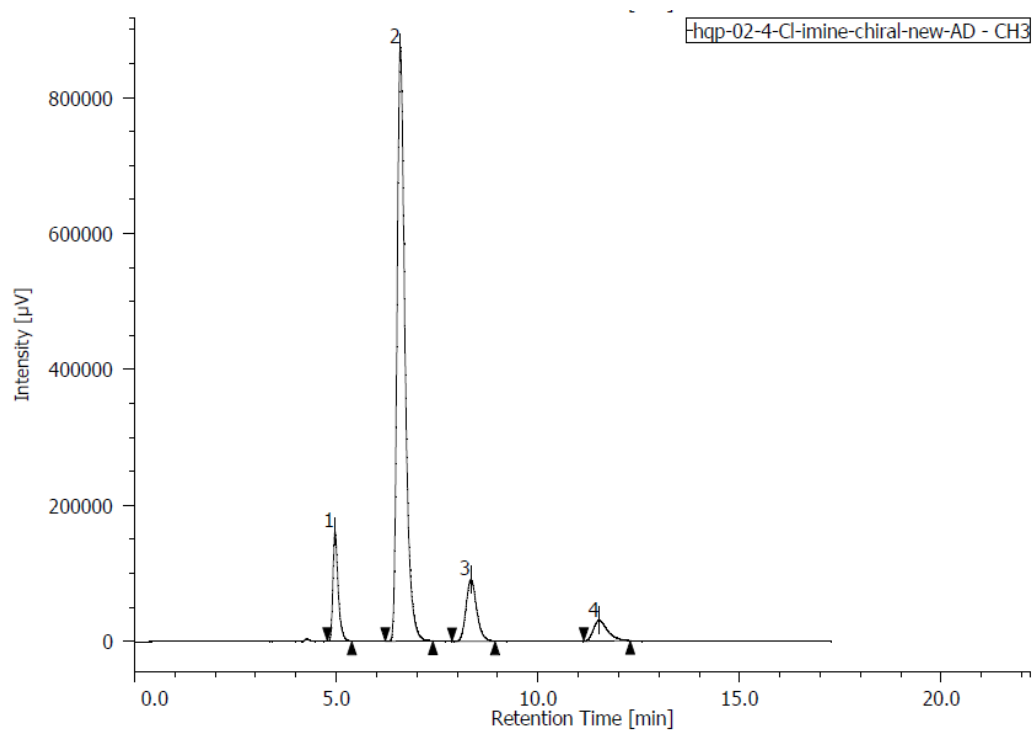

| Peak                 | 1    | 2    | 3    | 4     |
|----------------------|------|------|------|-------|
| Retention Time (min) | 4.97 | 6.59 | 8.33 | 11.52 |
| Area (%)             | 9.1  | 75.7 | 10.5 | 4.7   |

Compound **4ag**

HPLC conditions: DAICEL Chiralpak AD-3 column, hexane/*i*-PrOH = 70/30, 254 nm, 1.0 mL/min, 40 °C,  $t_{\text{major}} = 7.25$  min,  $t_{\text{minor}} = 10.42$  min;

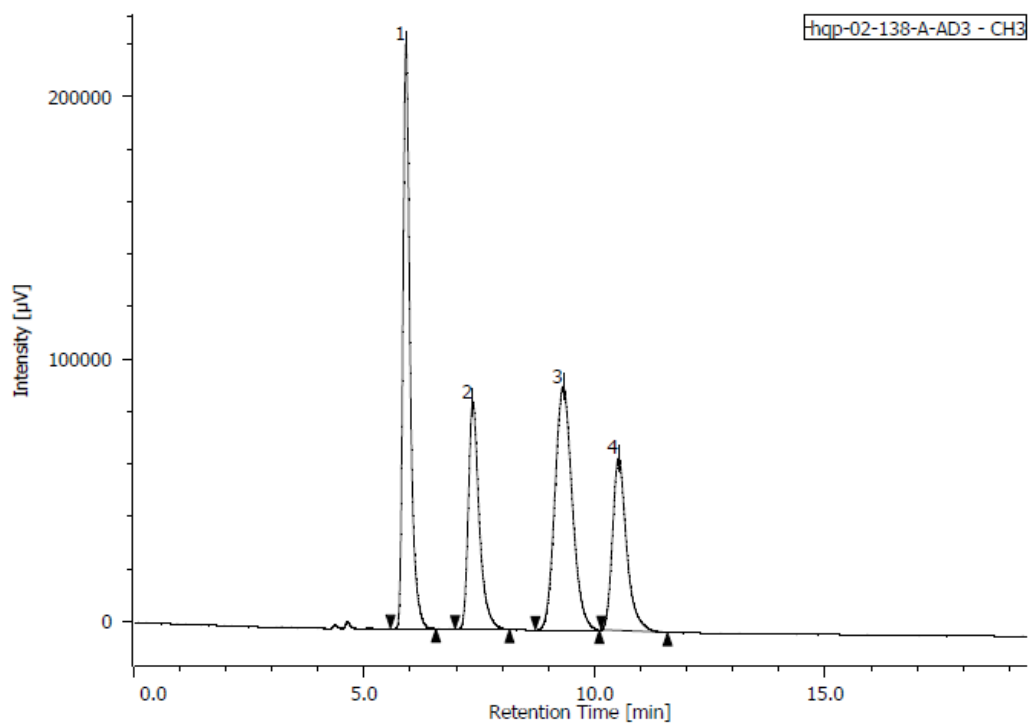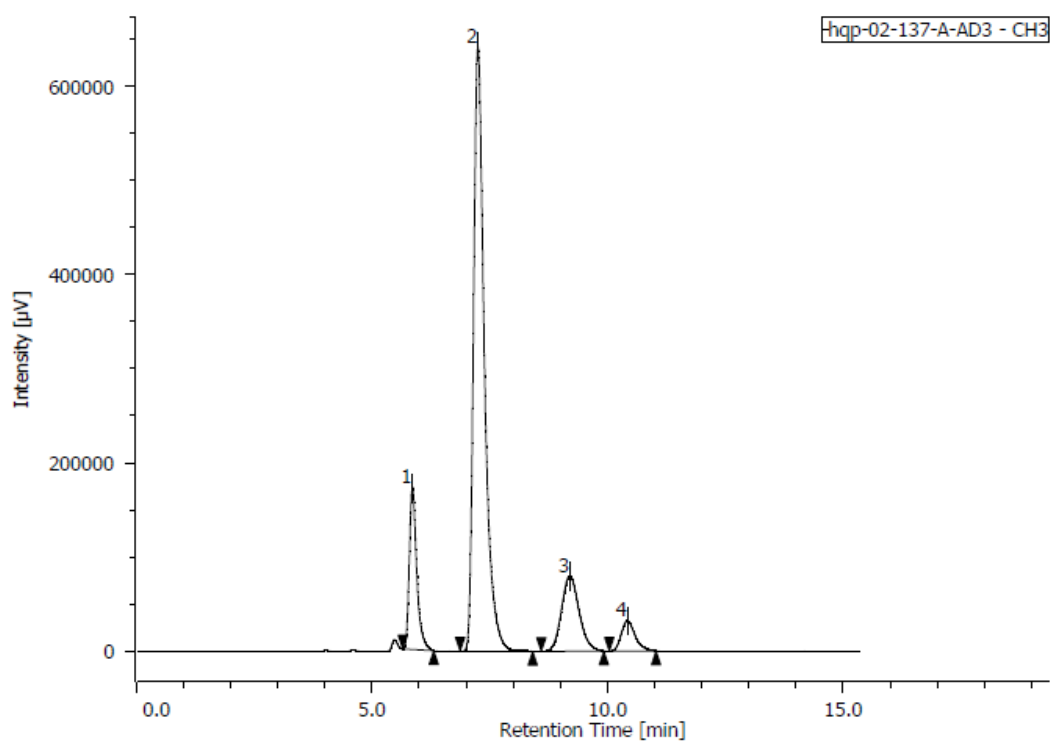

| Peak                 | 1    | 2    | 3    | 4     |
|----------------------|------|------|------|-------|
| Retention Time (min) | 5.86 | 7.25 | 9.20 | 10.42 |
| Area (%)             | 12.7 | 69.2 | 13.7 | 4.4   |

Compound **4ah**

HPLC conditions: DAICEL Chiralpak OD-3 column, hexane/*i*-PrOH = 90/10, 254 nm, 1.0 mL/min, 30 °C,  $t_{\text{major}} = 11.59$  min,  $t_{\text{minor}} = 14.65$  min;

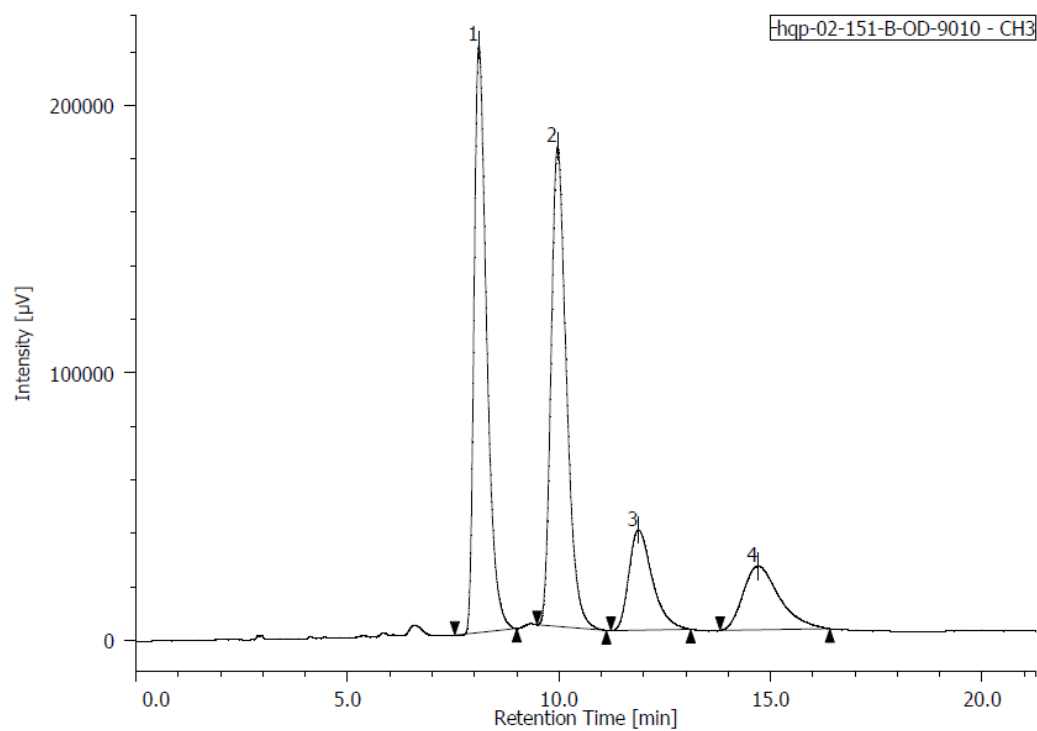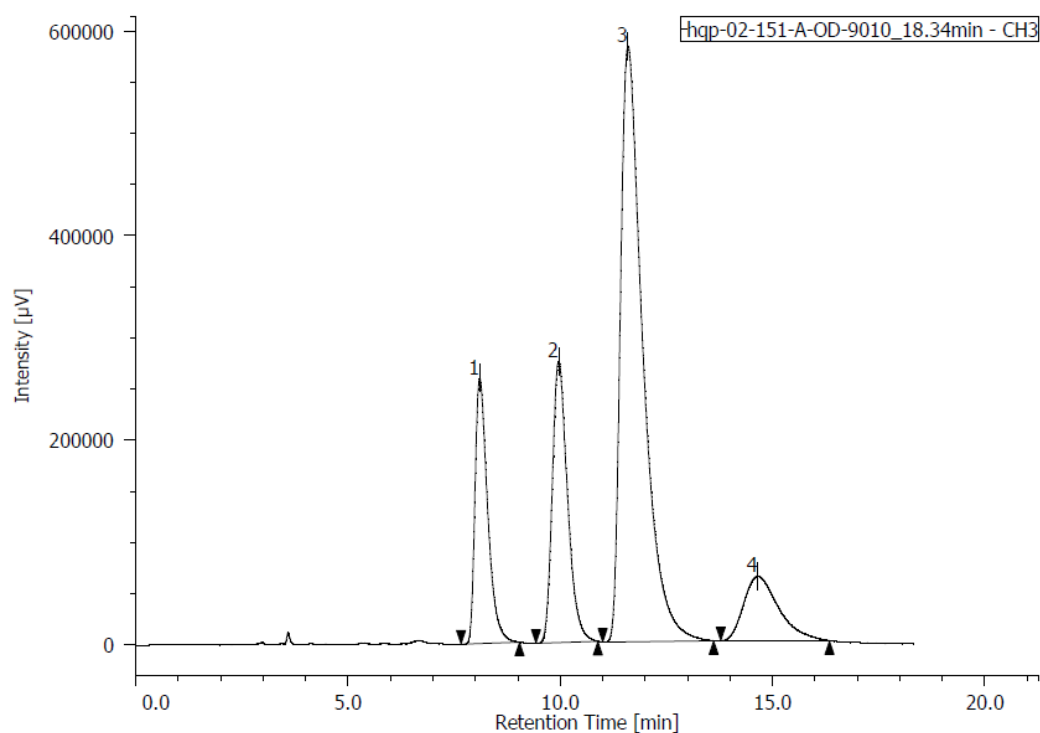

| Peak                 | 1    | 2    | 3     | 4     |
|----------------------|------|------|-------|-------|
| Retention Time (min) | 8.10 | 9.97 | 11.59 | 14.65 |
| Area (%)             | 14.4 | 18.3 | 57.5  | 9.7   |

Compound **4oa**

HPLC conditions: DAICEL Chiralpak IA-3 column, hexane/*i*-PrOH = 70/30, 254 nm, 1.0 mL/min, 40 °C,  $t_{\text{major}} = 6.29$  min,  $t_{\text{minor}} = 7.48$  min;

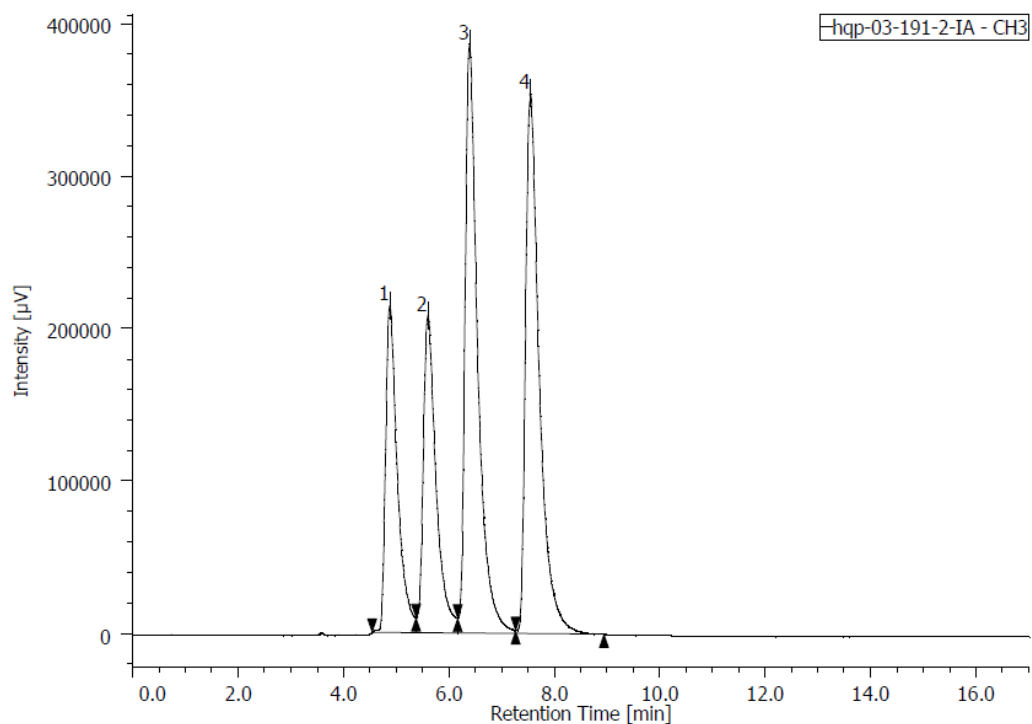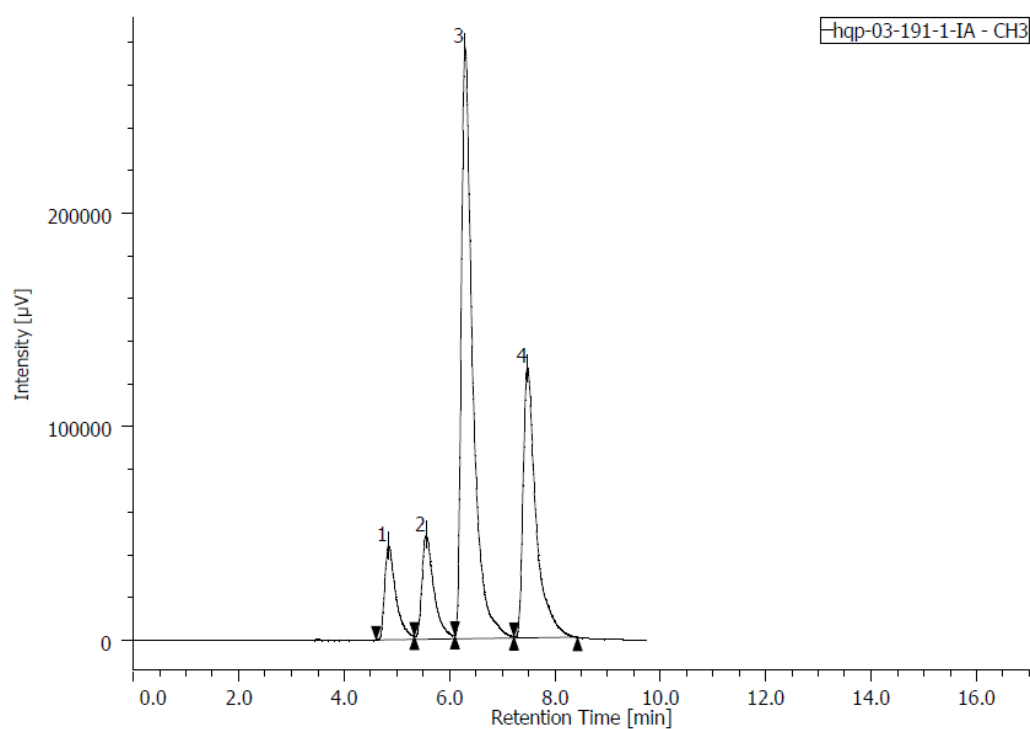

| Peak                 | 1    | 2    | 3    | 4    |
|----------------------|------|------|------|------|
| Retention Time (min) | 4.84 | 5.55 | 6.29 | 7.48 |
| Area (%)             | 8.5  | 9.9  | 53.8 | 27.8 |

Compound **5**

HPLC conditions: DAICEL Chiralpak AD-3 column, hexane/*i*-PrOH = 70/30, 254 nm, 1.0 mL/min, 40 °C,  $t_{\text{major}} = 7.46$  min,  $t_{\text{minor}} = 7.06$  min;

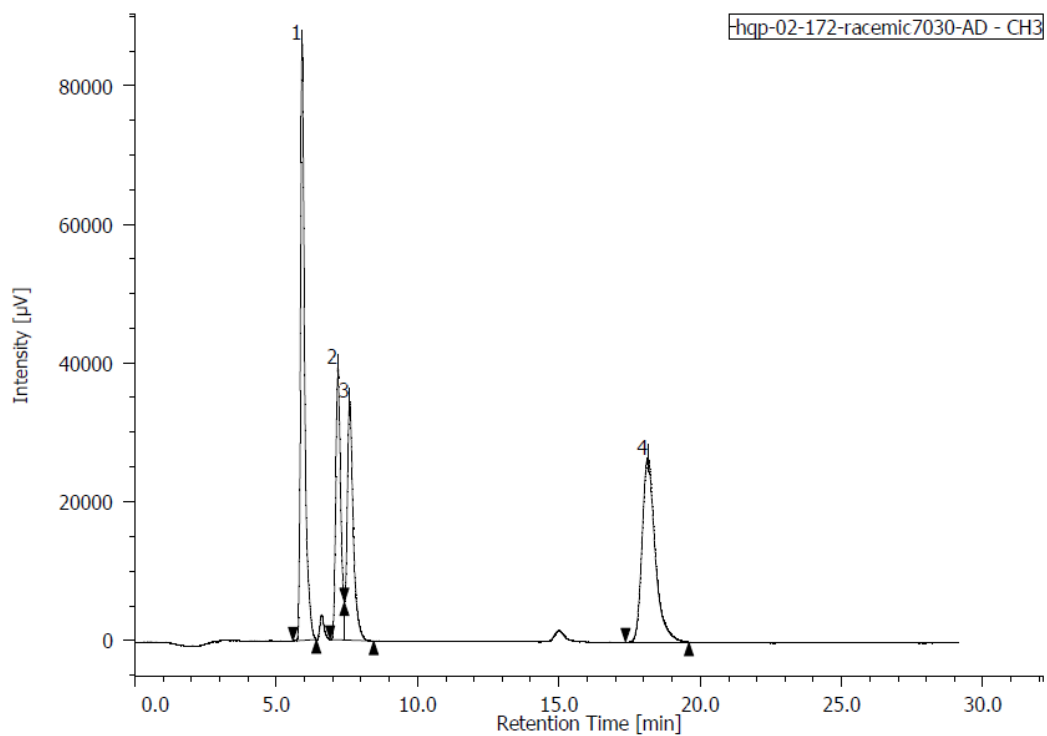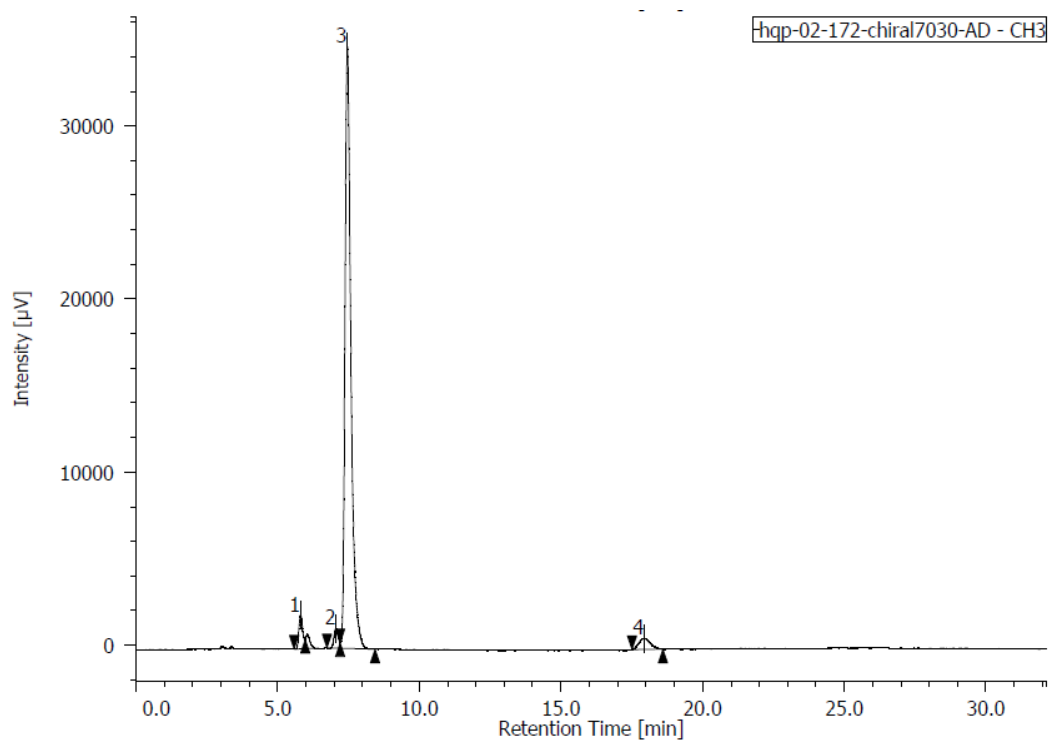

| Peak                 | 1    | 2    | 3    | 4    |
|----------------------|------|------|------|------|
| Retention Time (min) | 5.81 | 7.06 | 7.46 | 17.9 |
| Area (%)             | 3.3  | 2.2  | 91.3 | 3.2  |



## 8. NMR Spectra

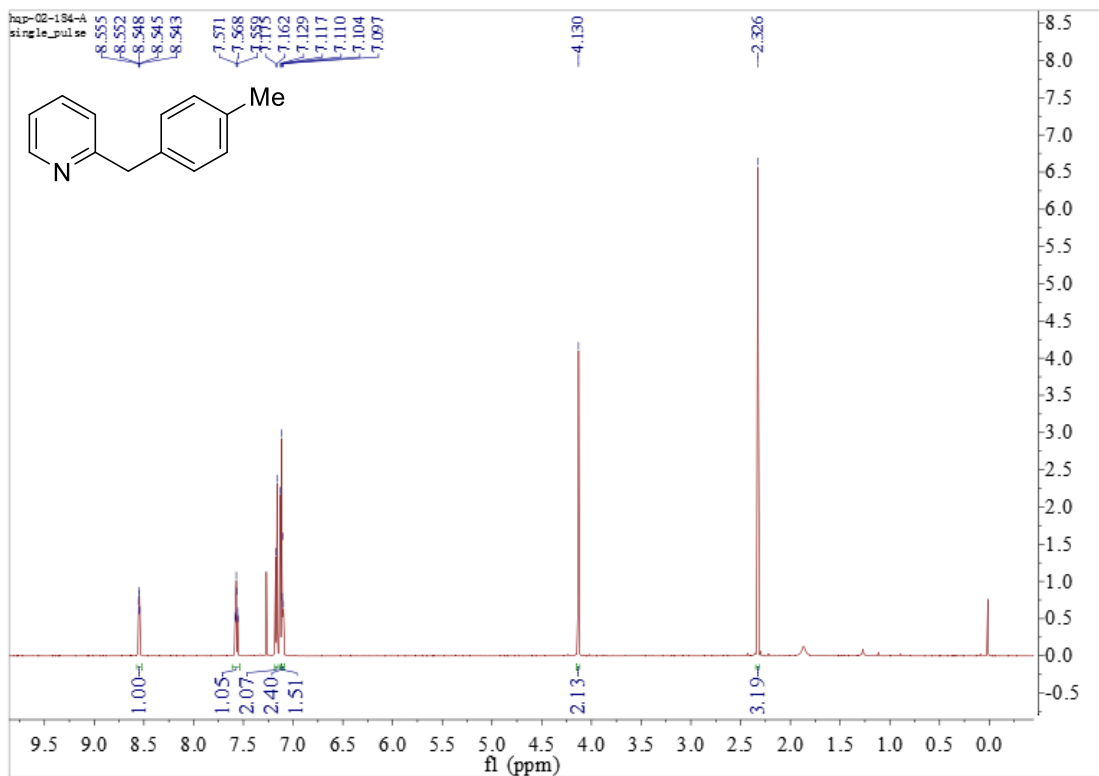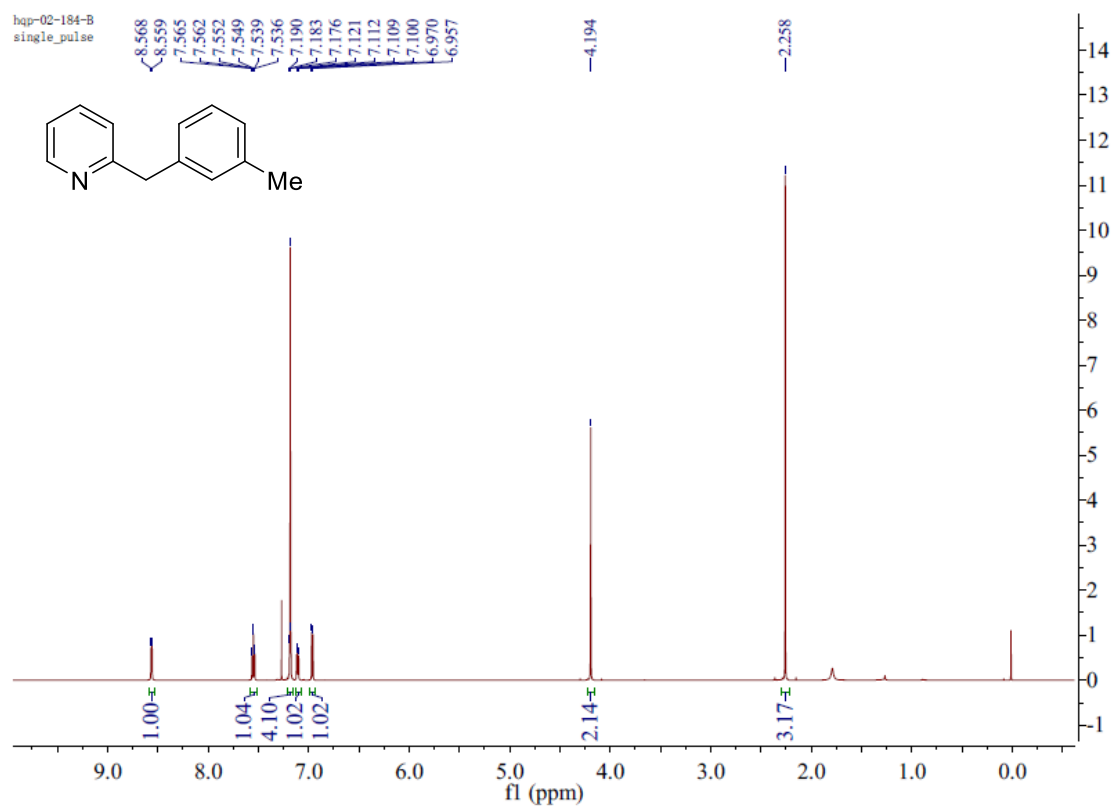

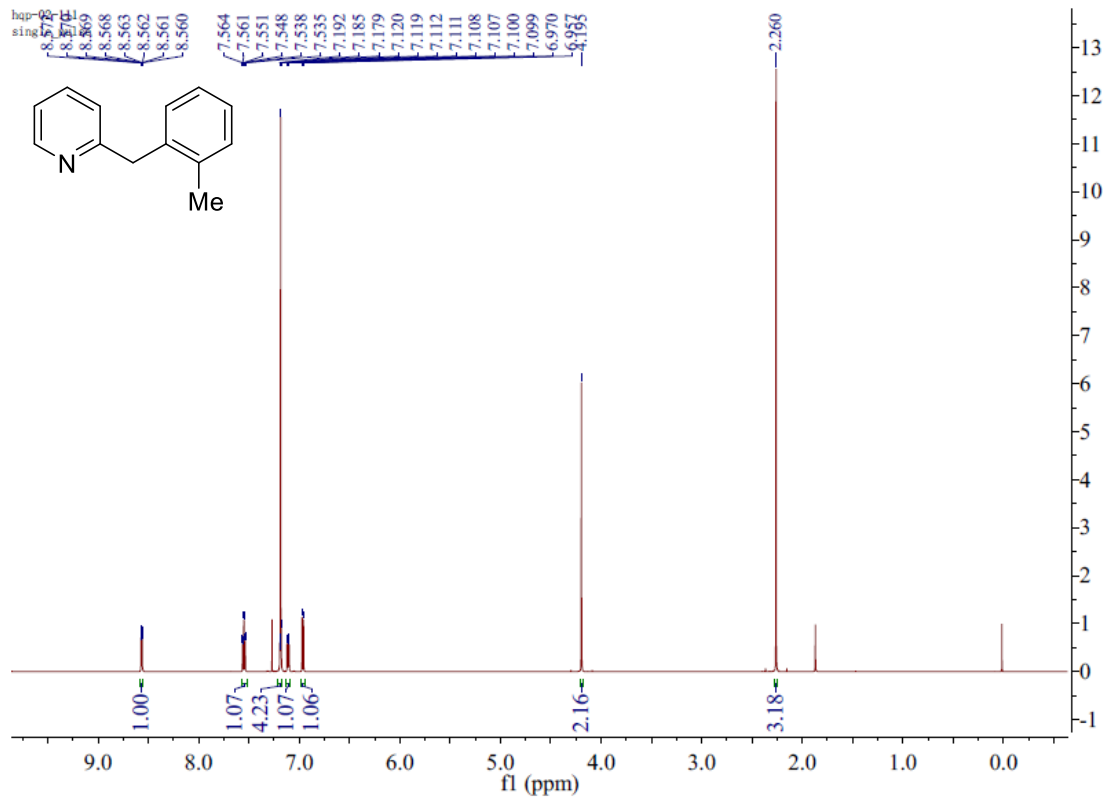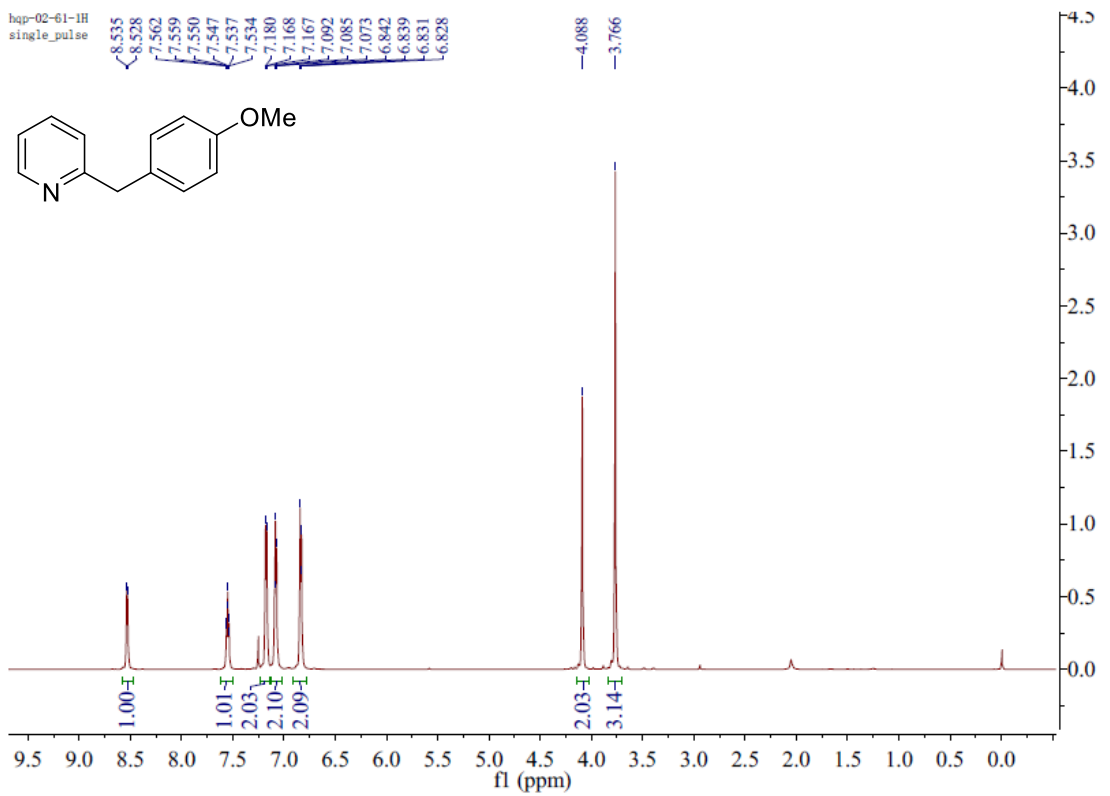

hqp-02-91  
single\_pulse

8.528  
8.525  
8.519  
8.516  
7.552  
7.549  
7.539  
7.092  
7.080  
6.722  
6.721  
6.714  
3.884

4.043

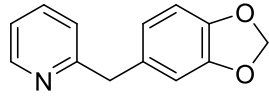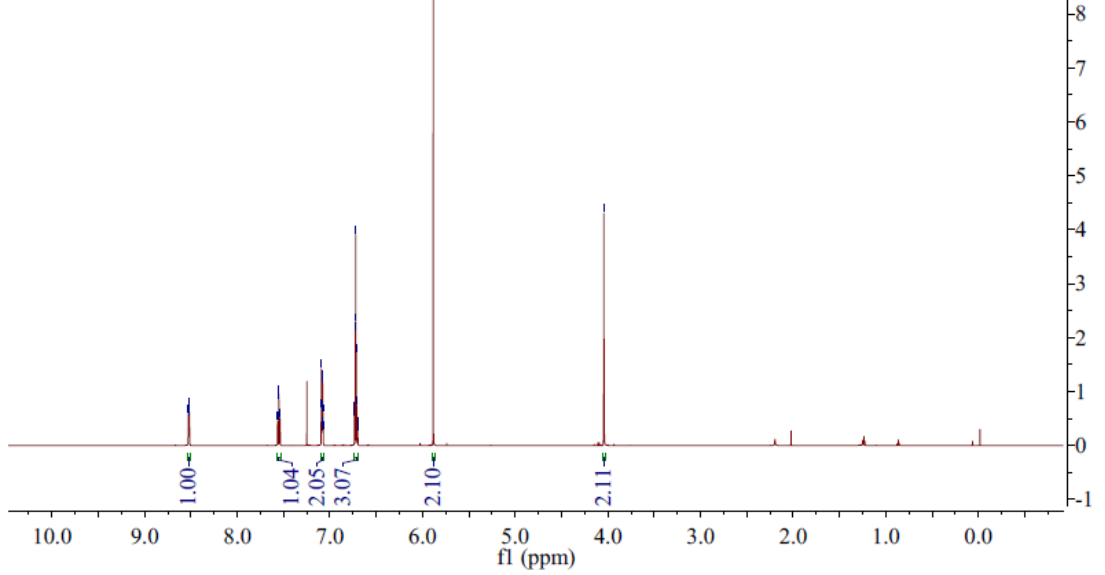

hqp-02-184-C  
single\_pulse

8.556  
8.548  
7.606  
7.603  
7.593  
7.590  
7.580  
7.577  
7.429  
7.415  
7.270  
7.152  
7.138  
7.133  
7.129  
7.121  
7.108  
7.095

4.107

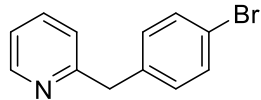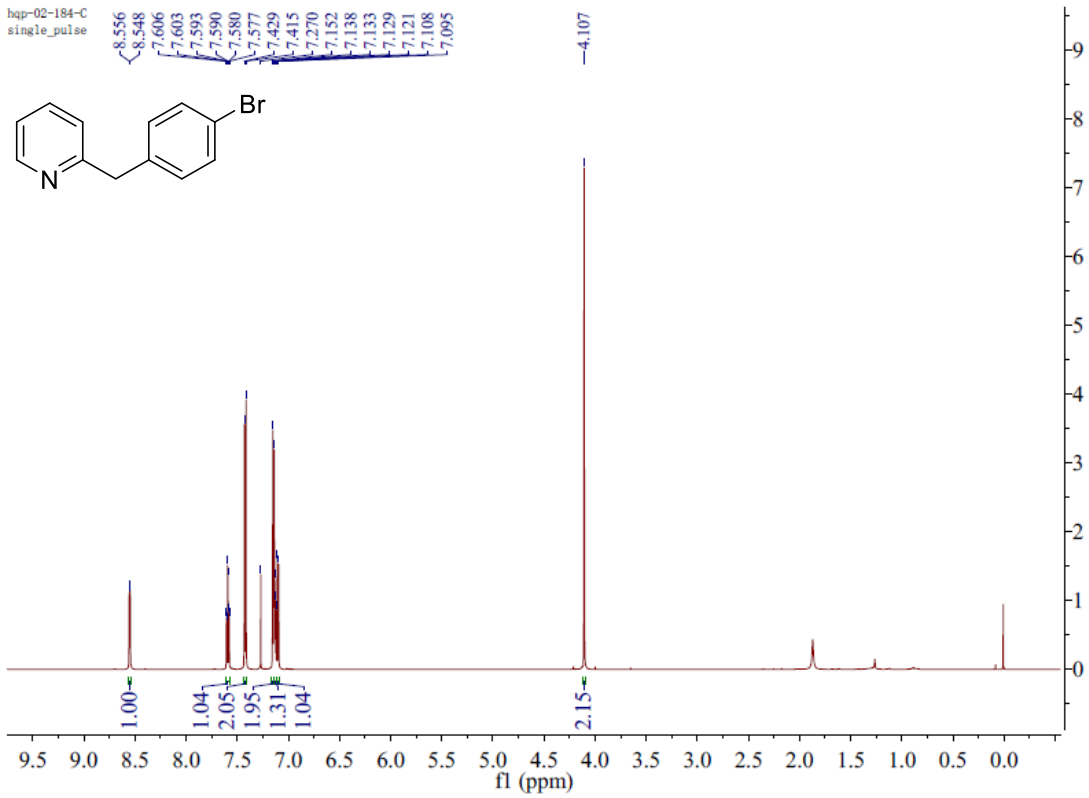

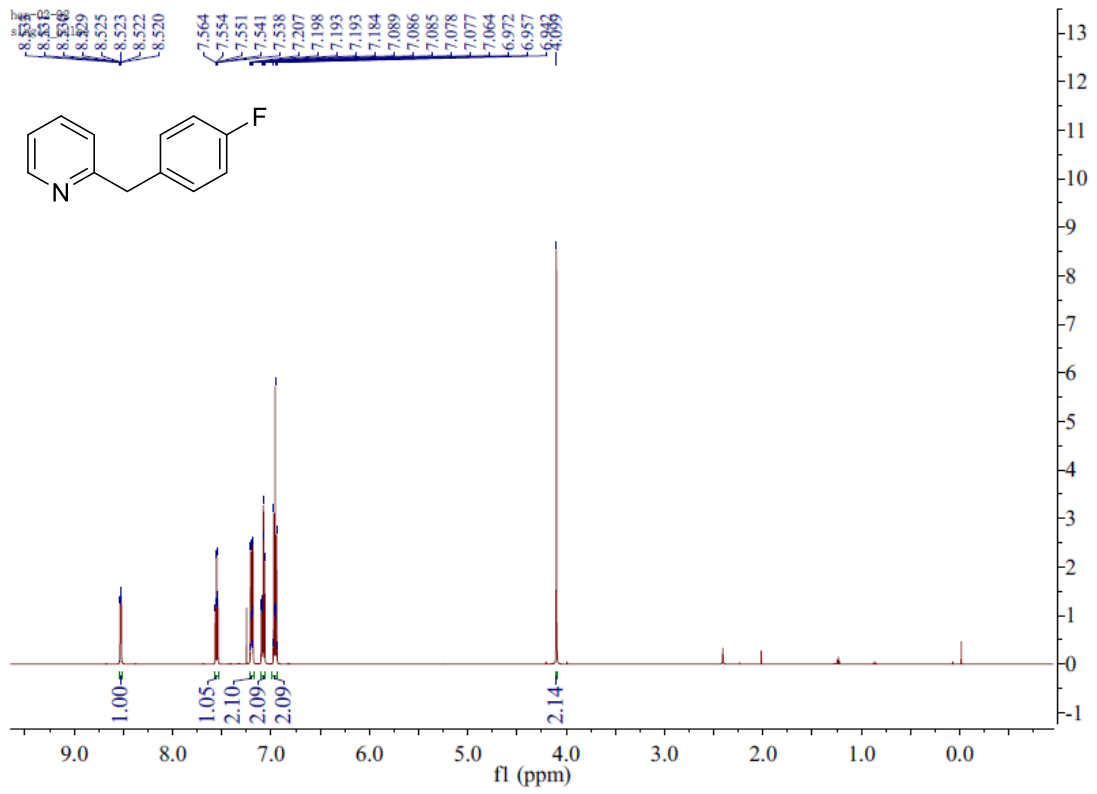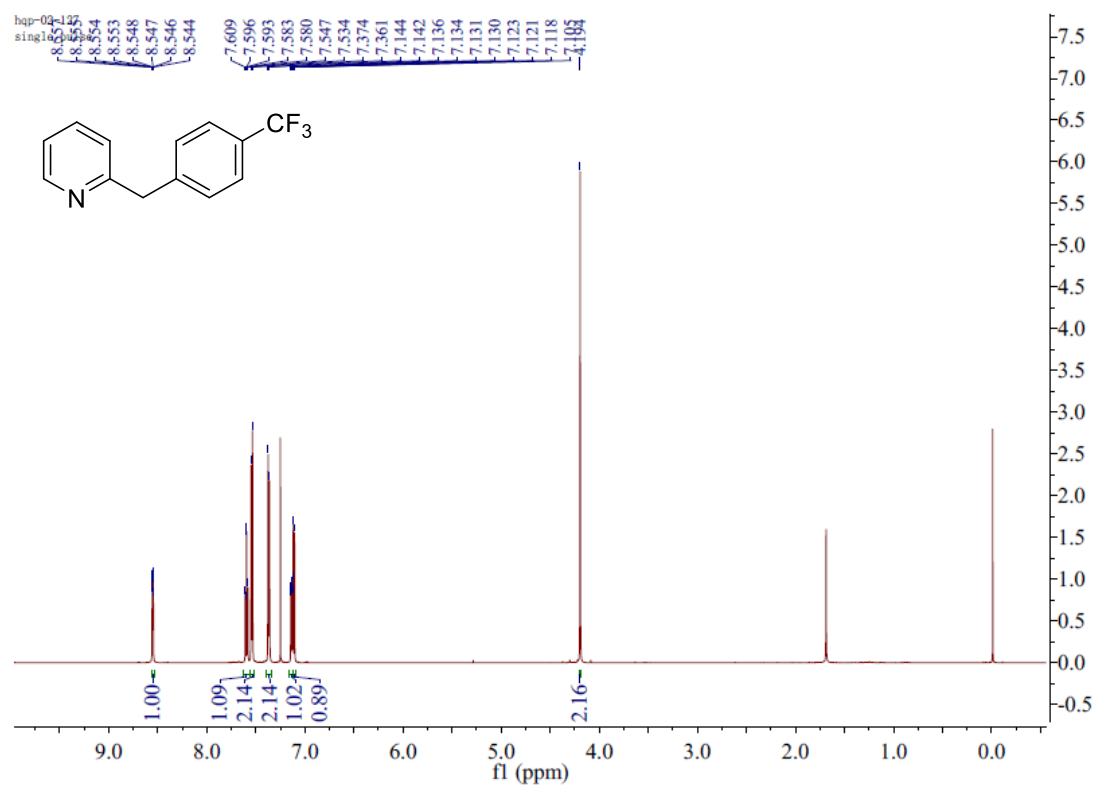

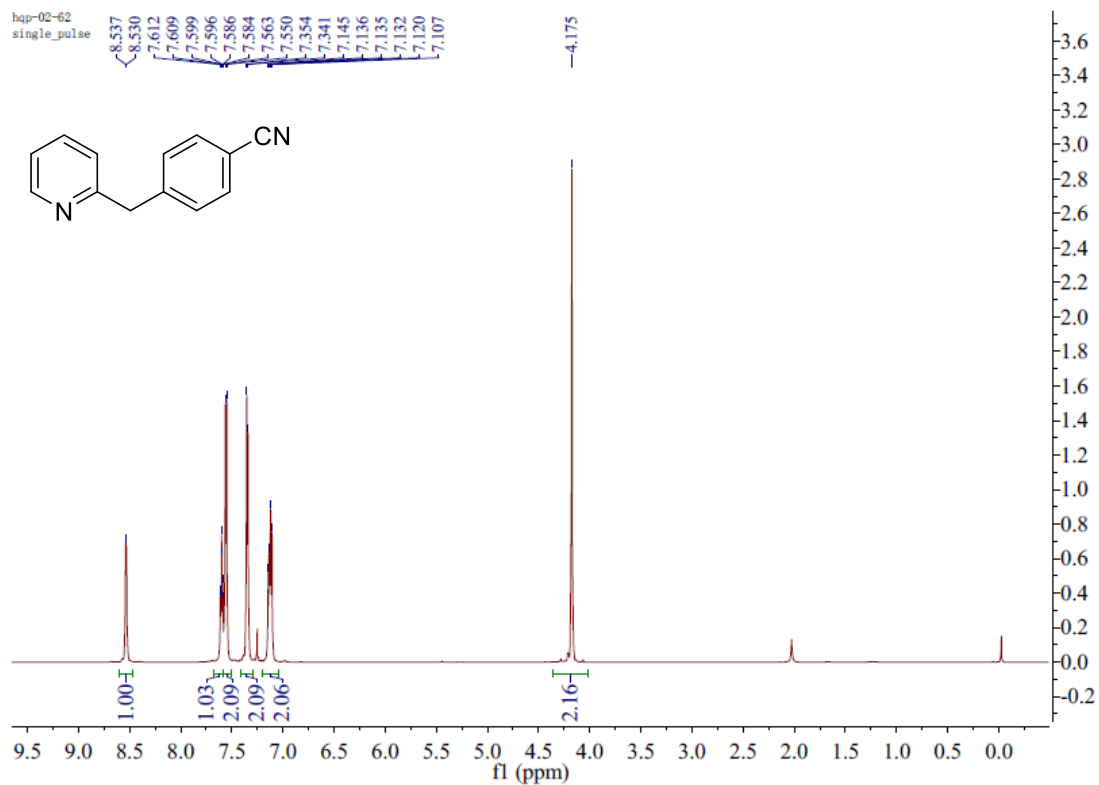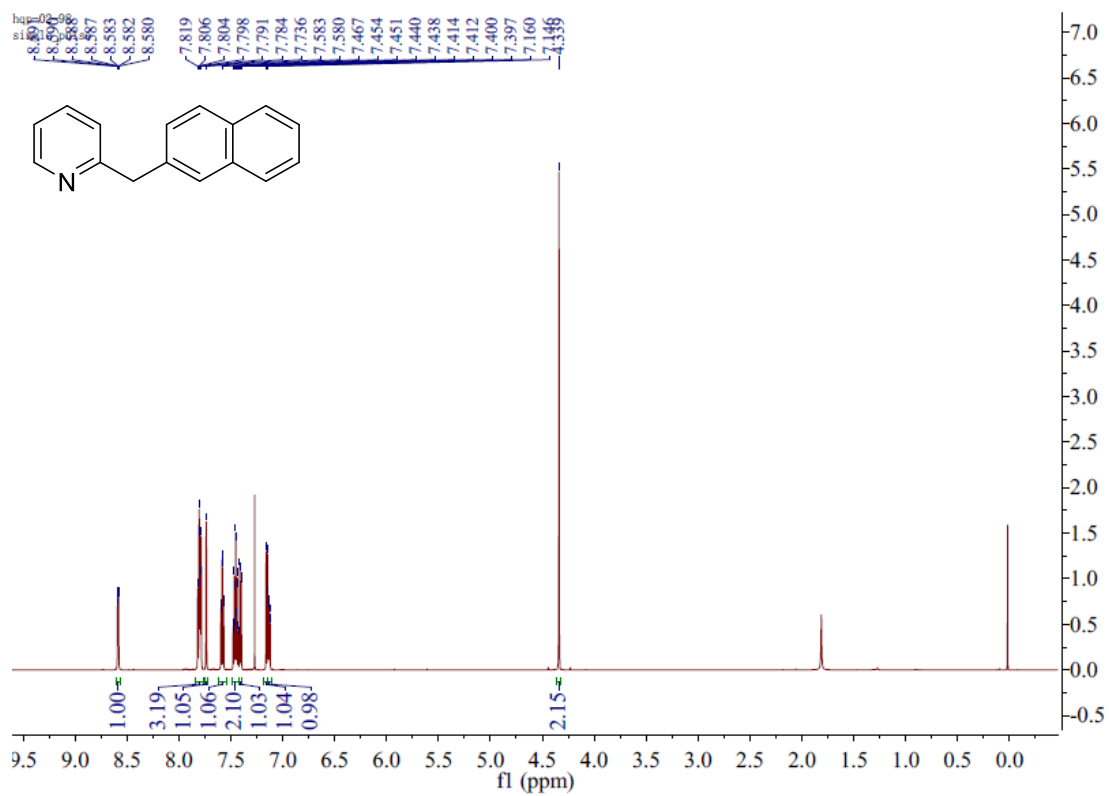

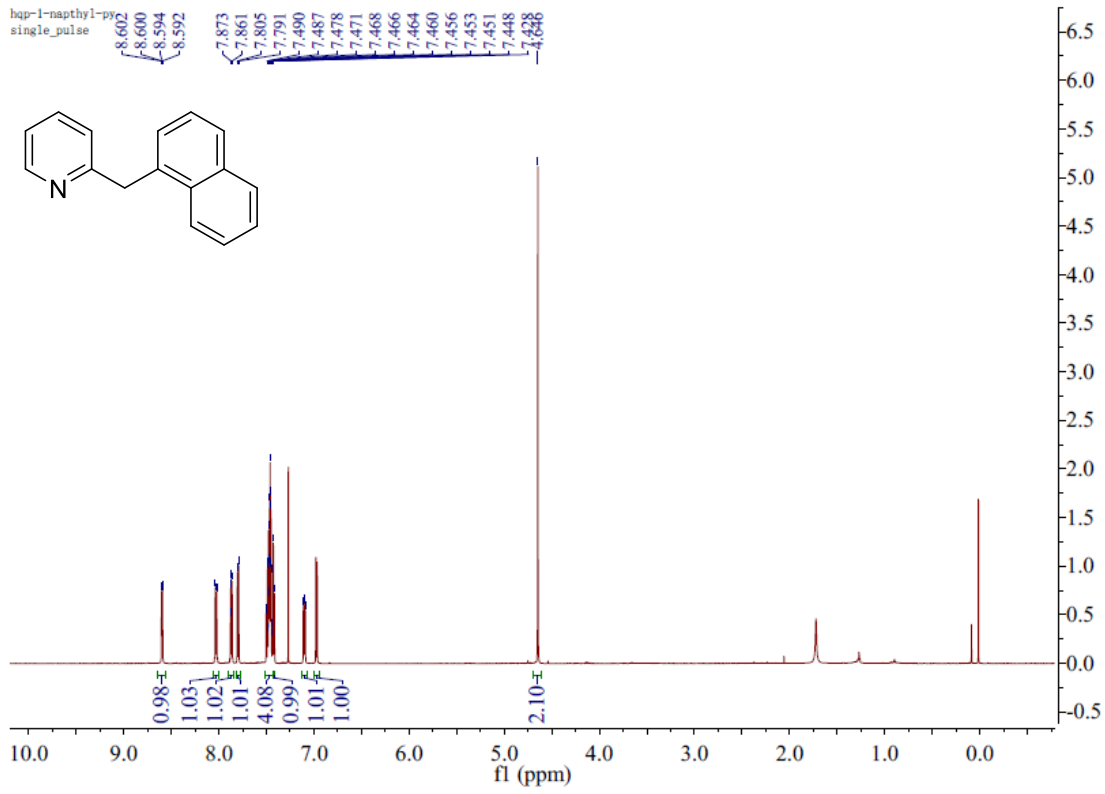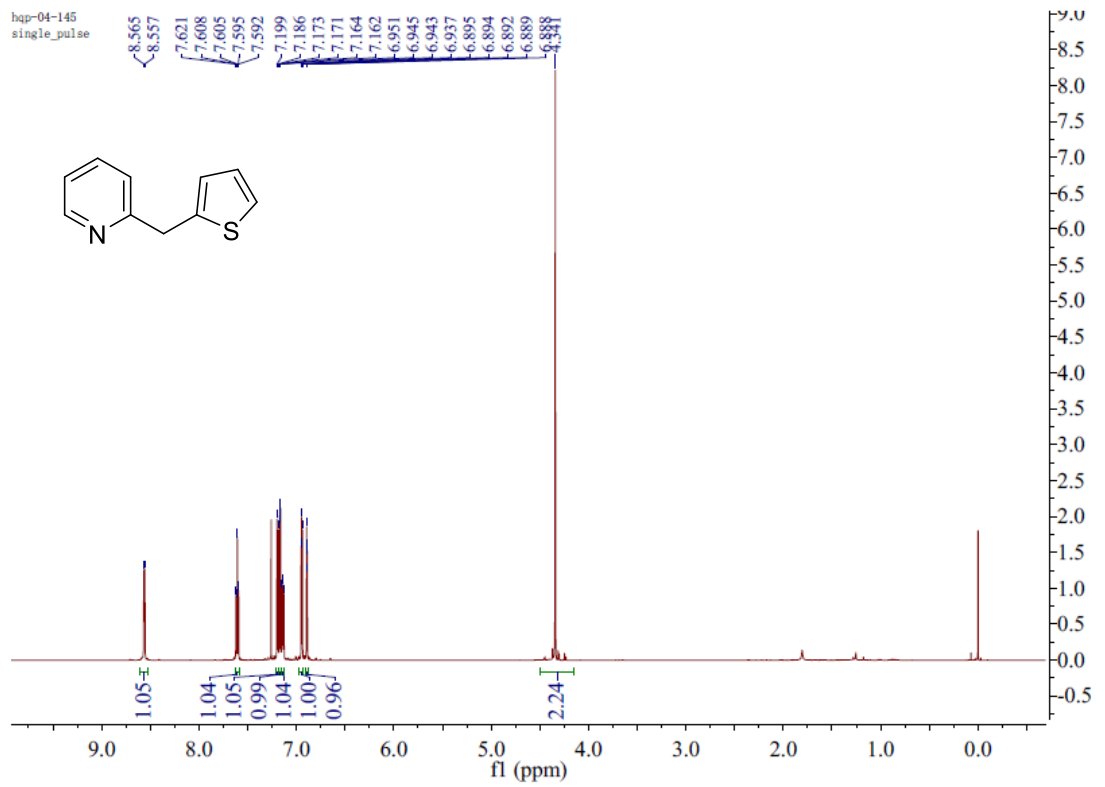

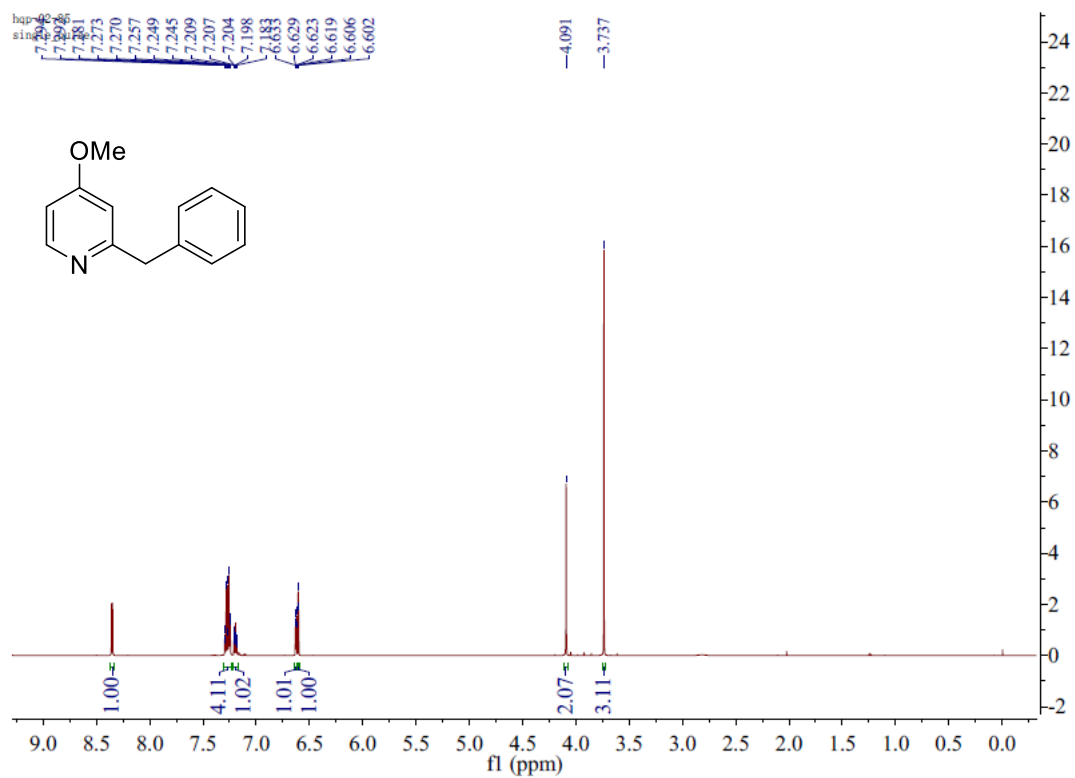

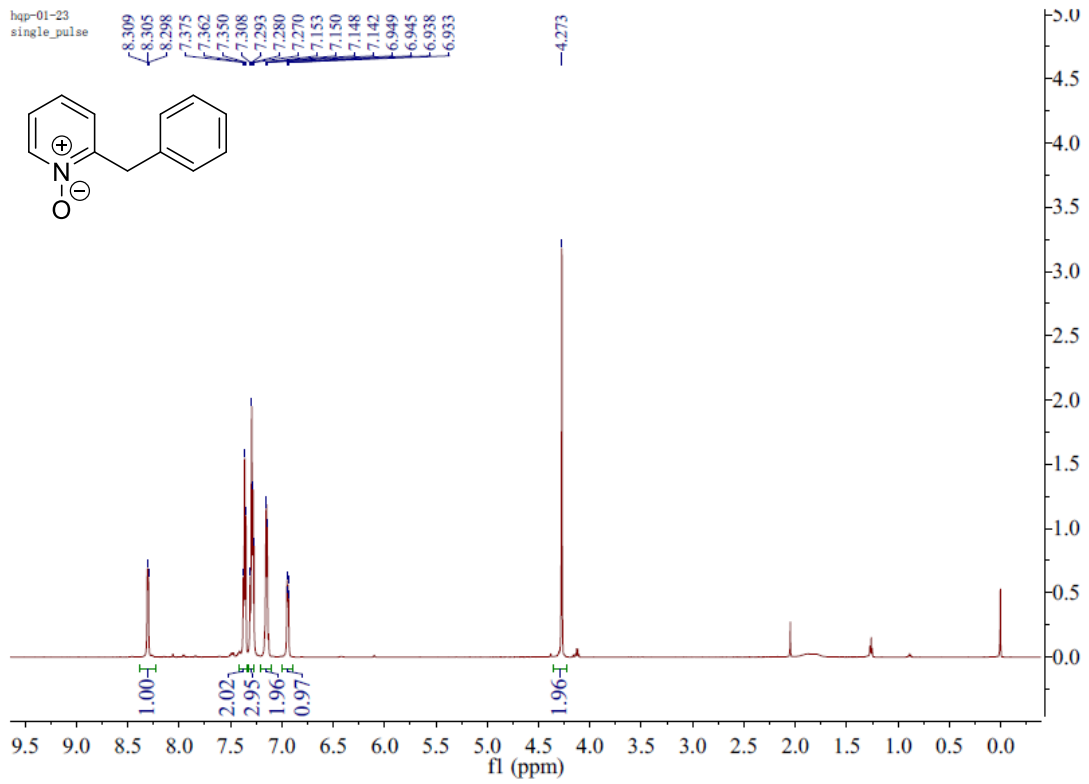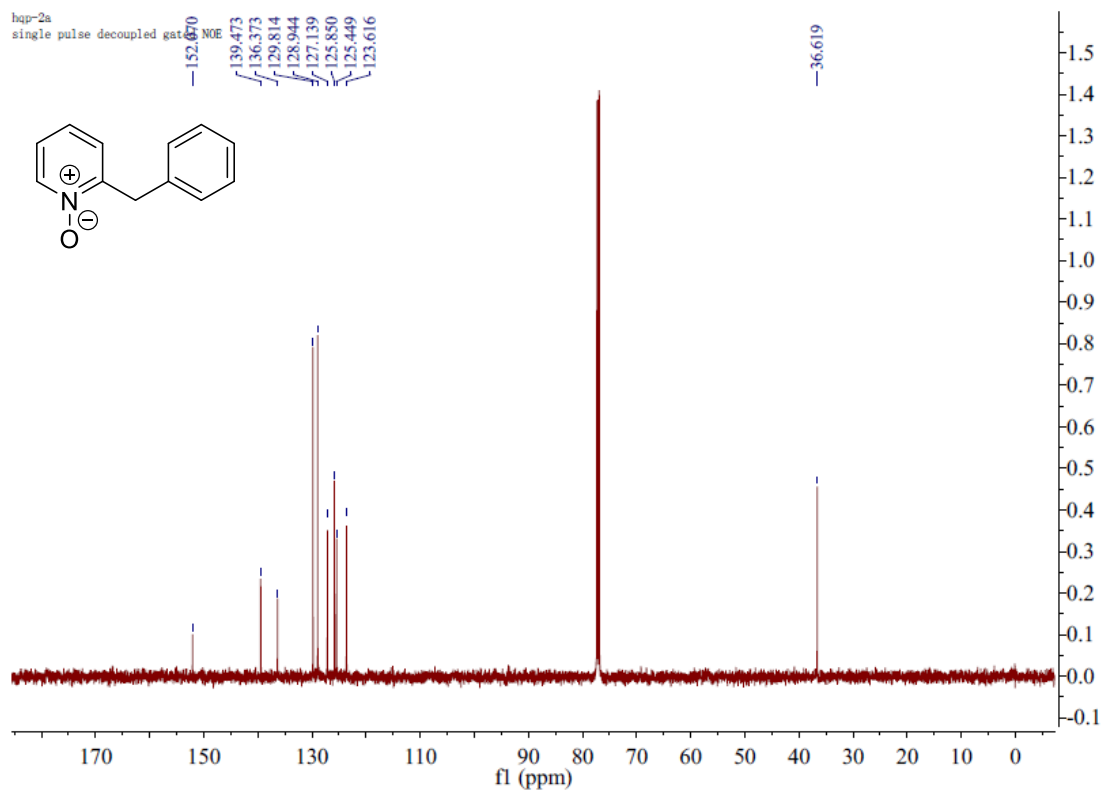



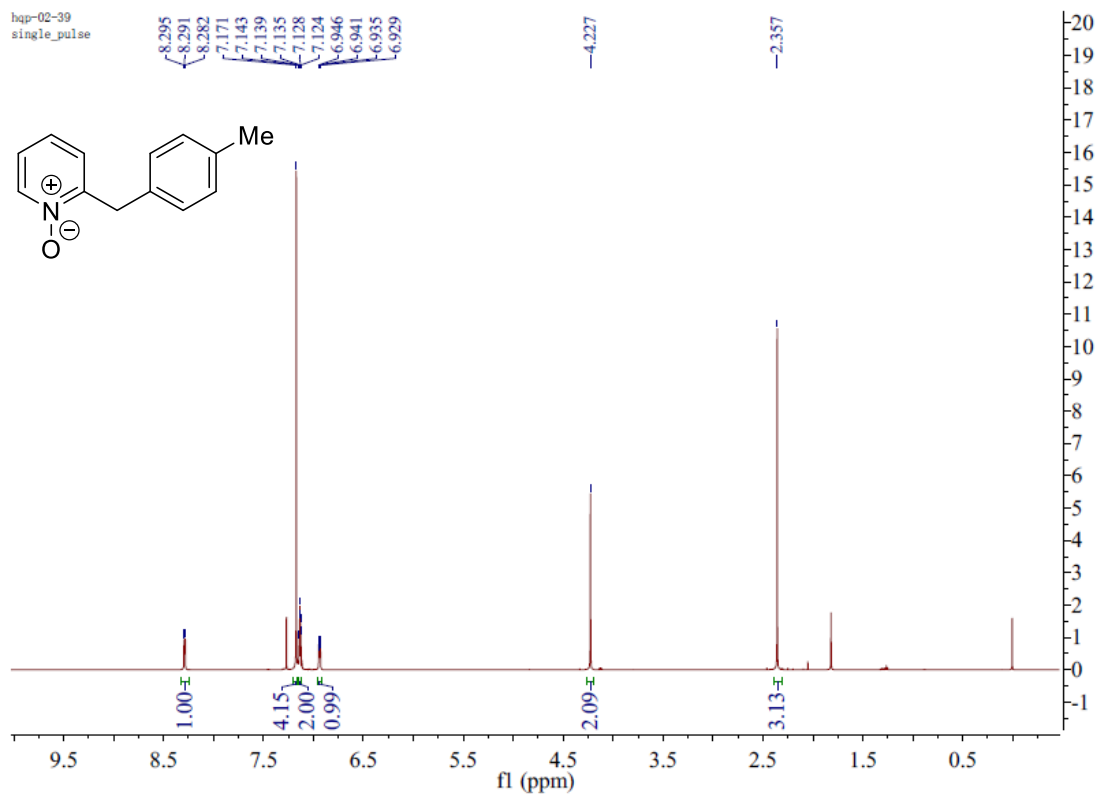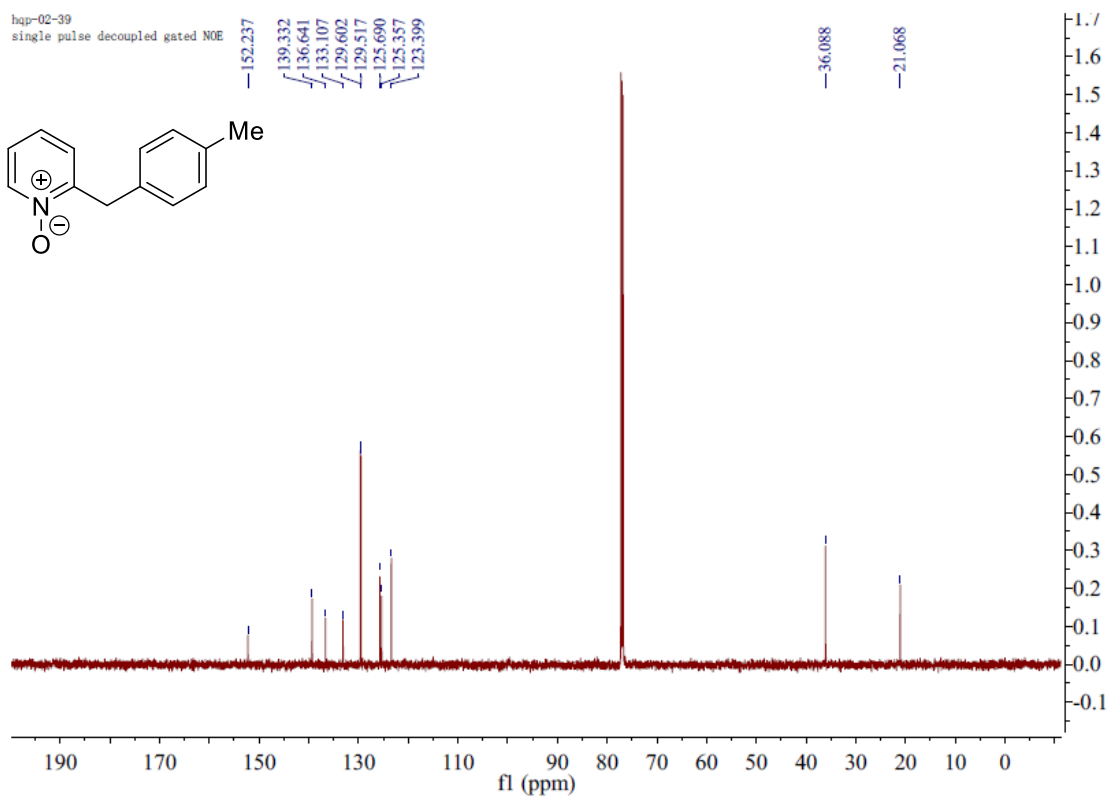

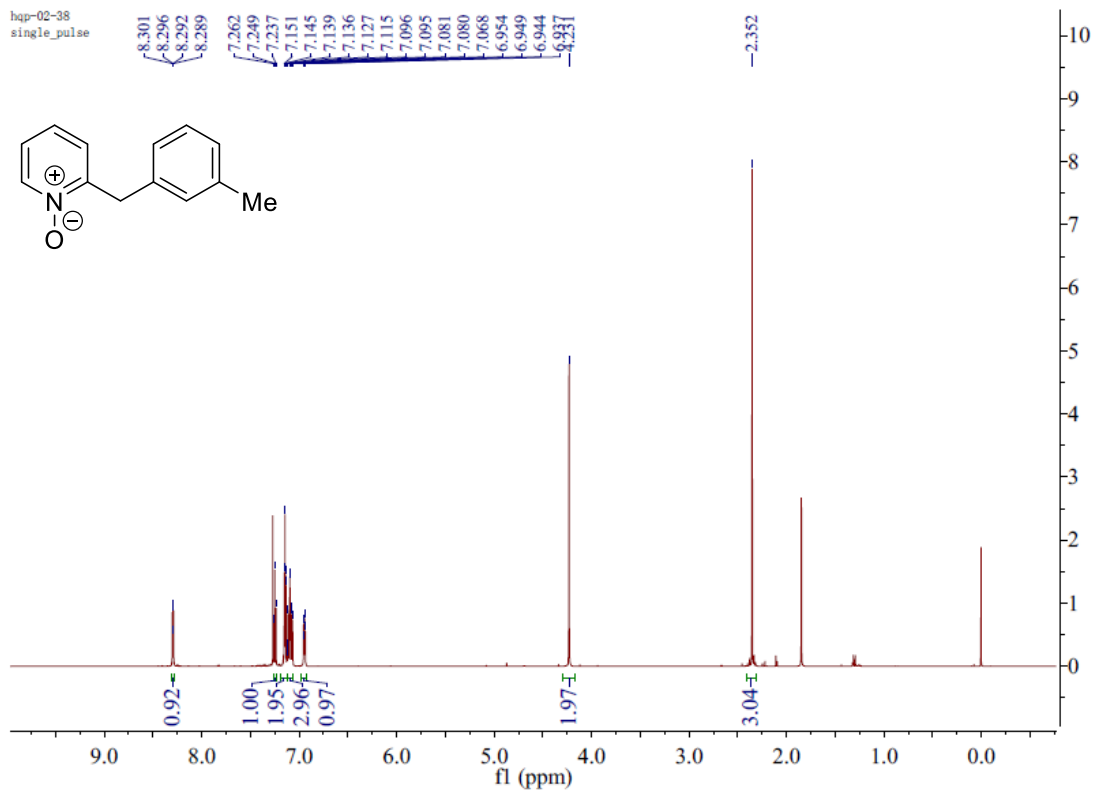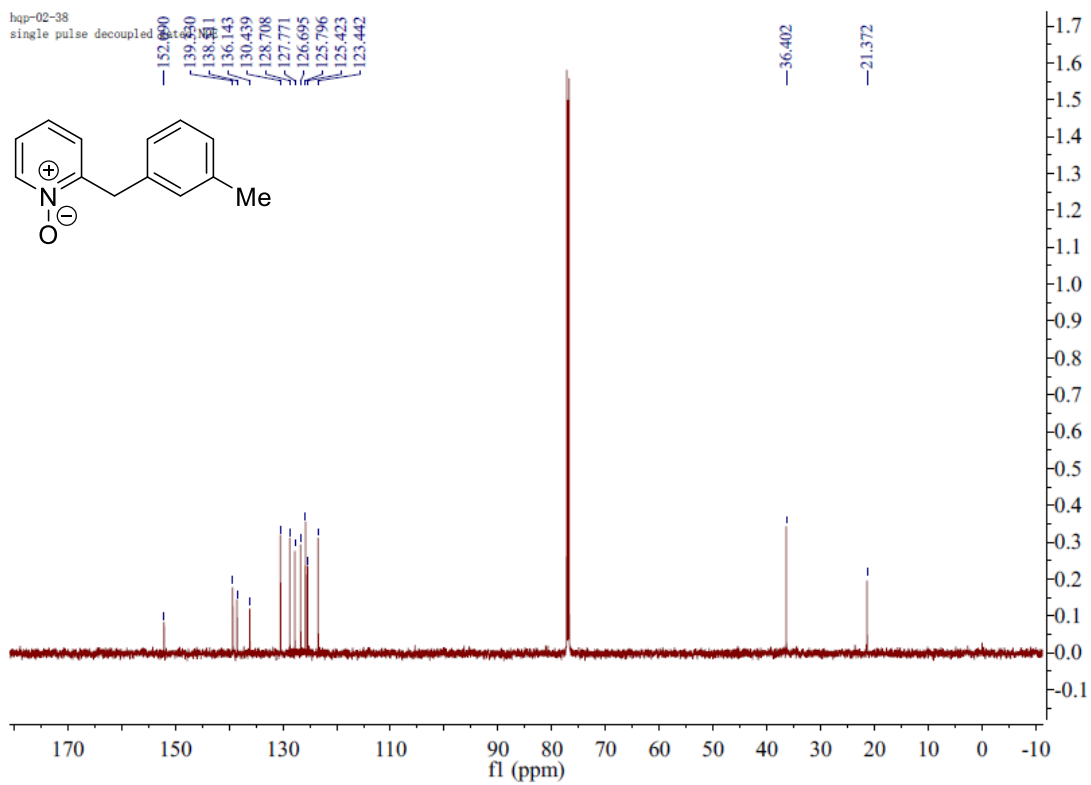

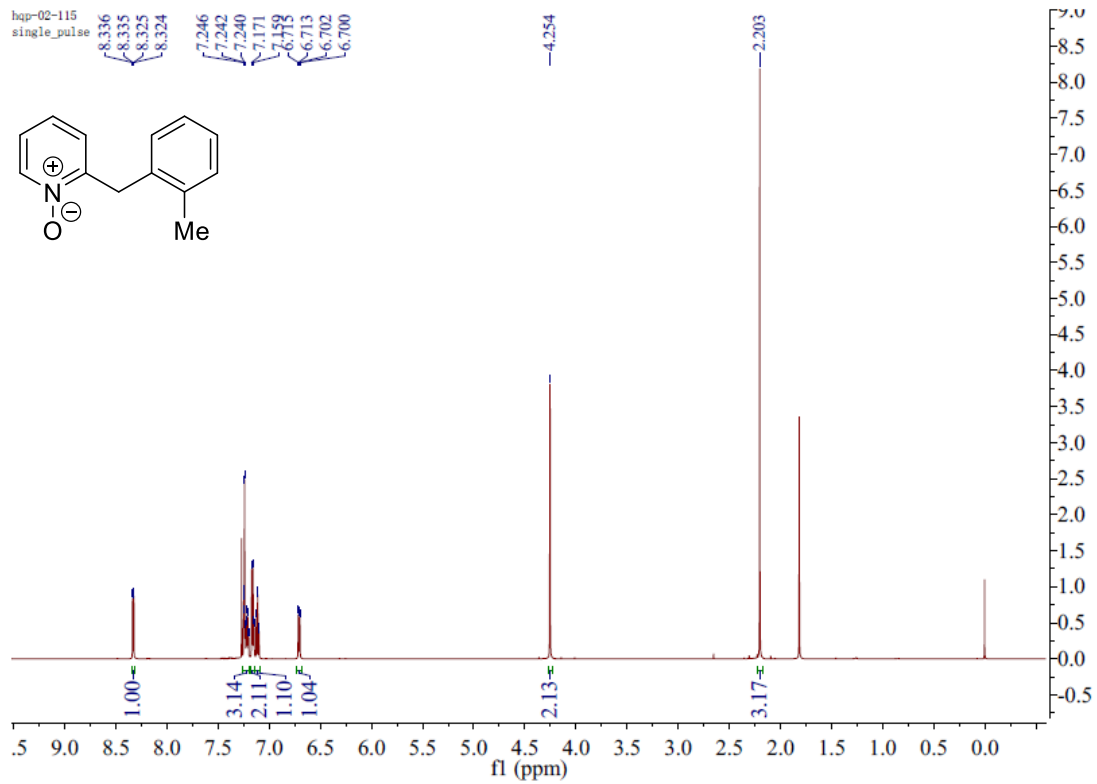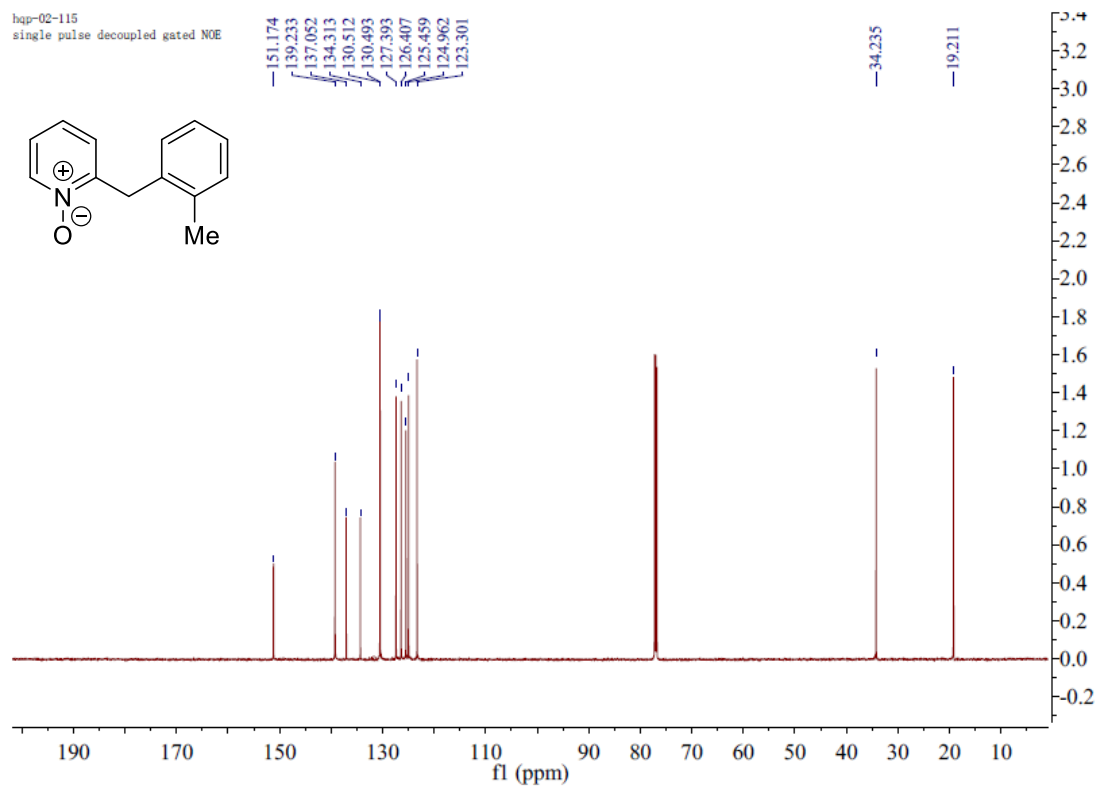

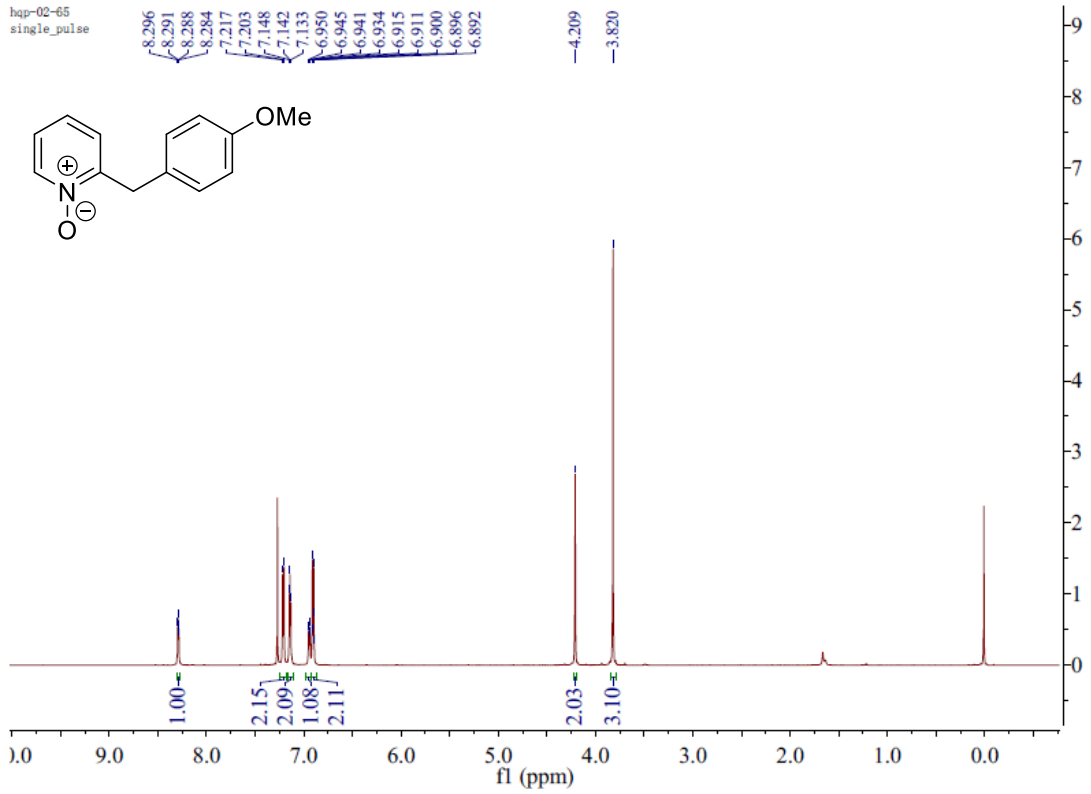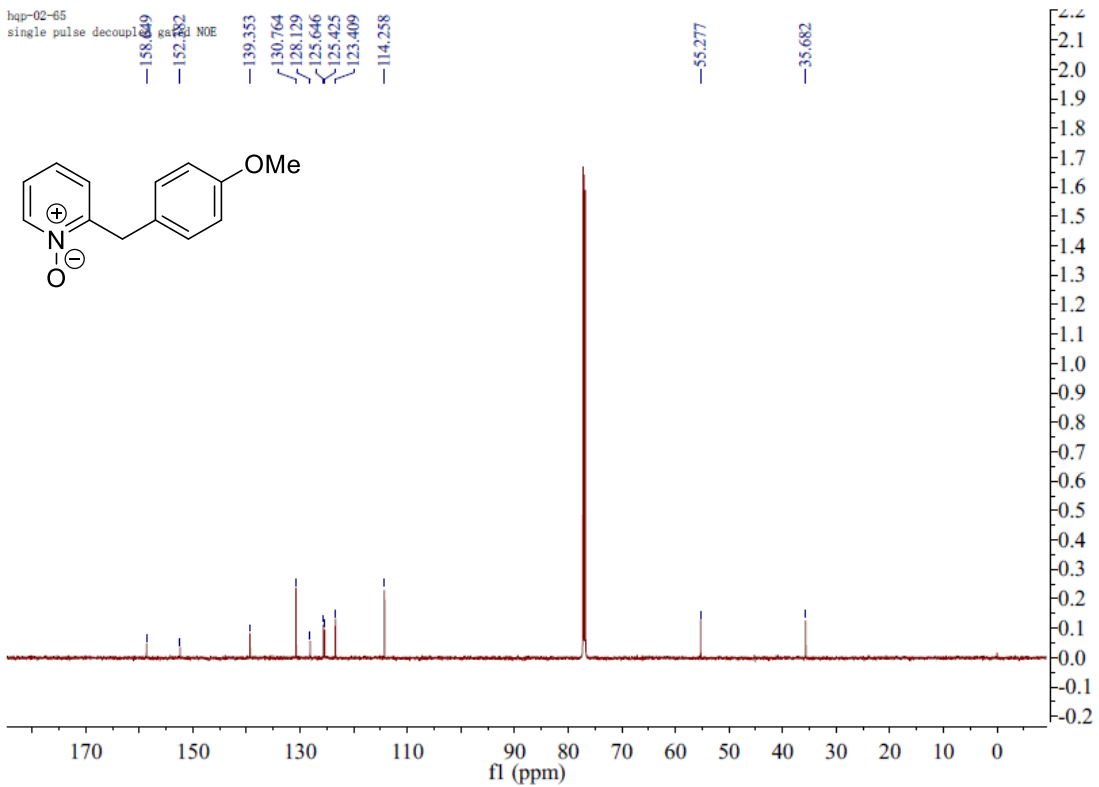

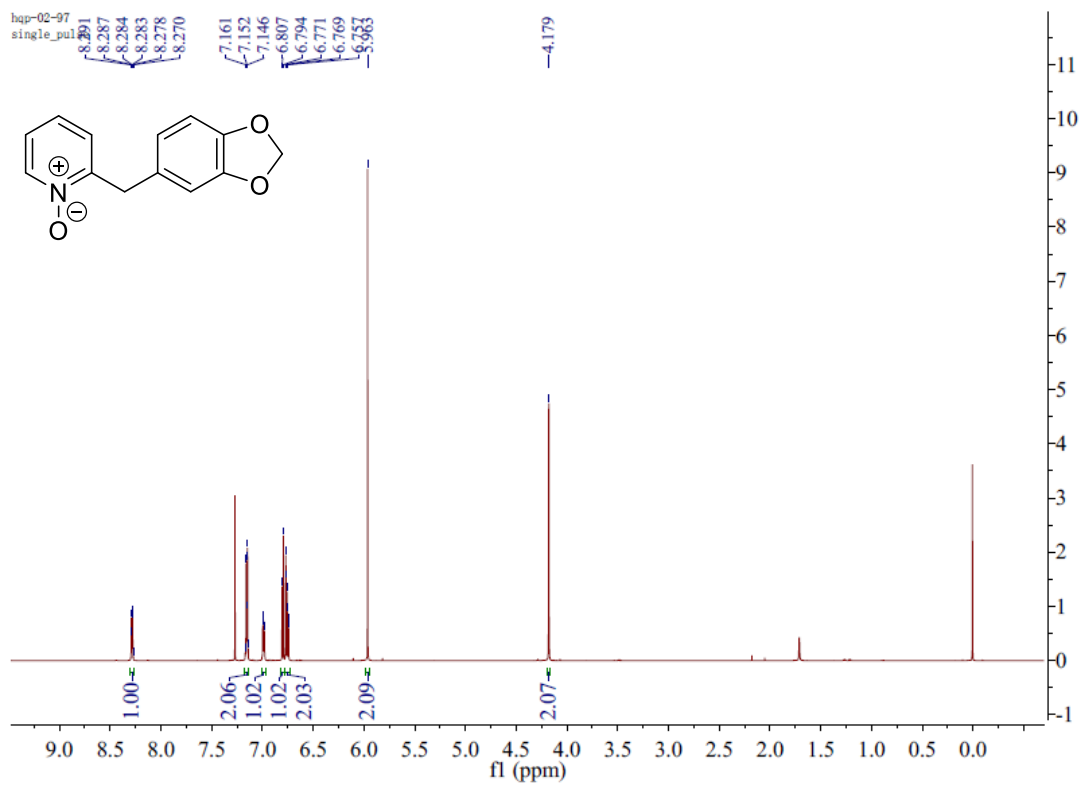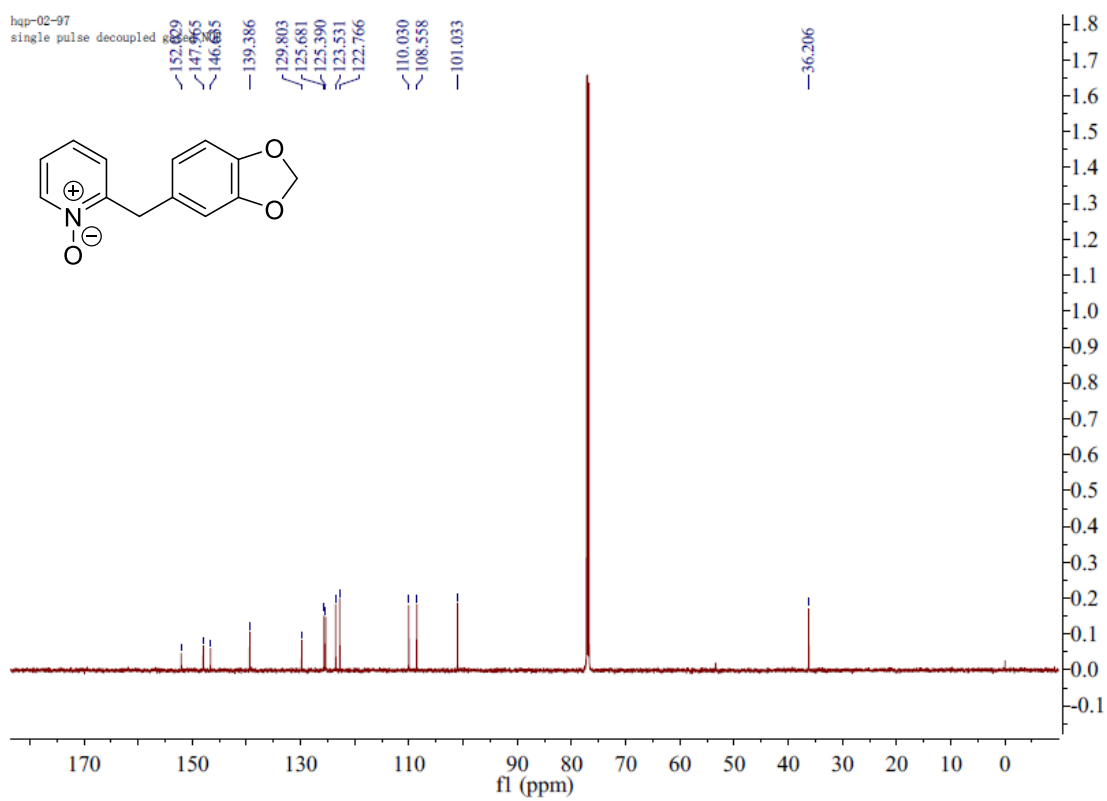

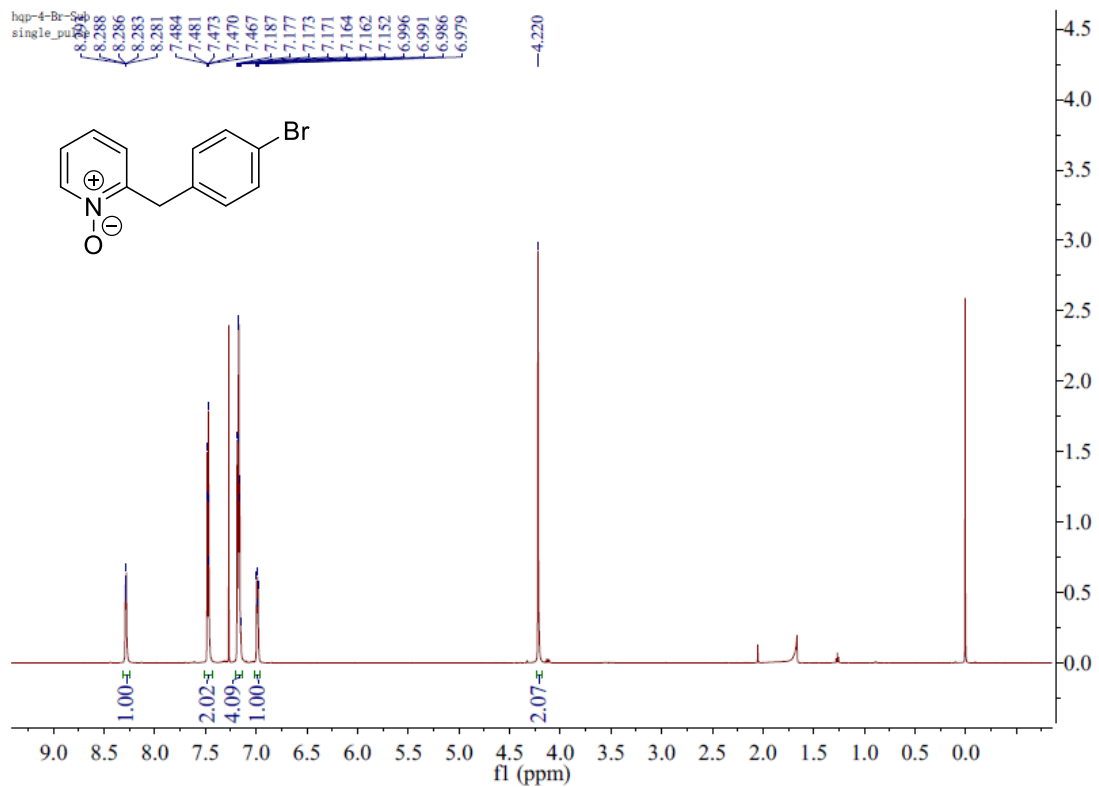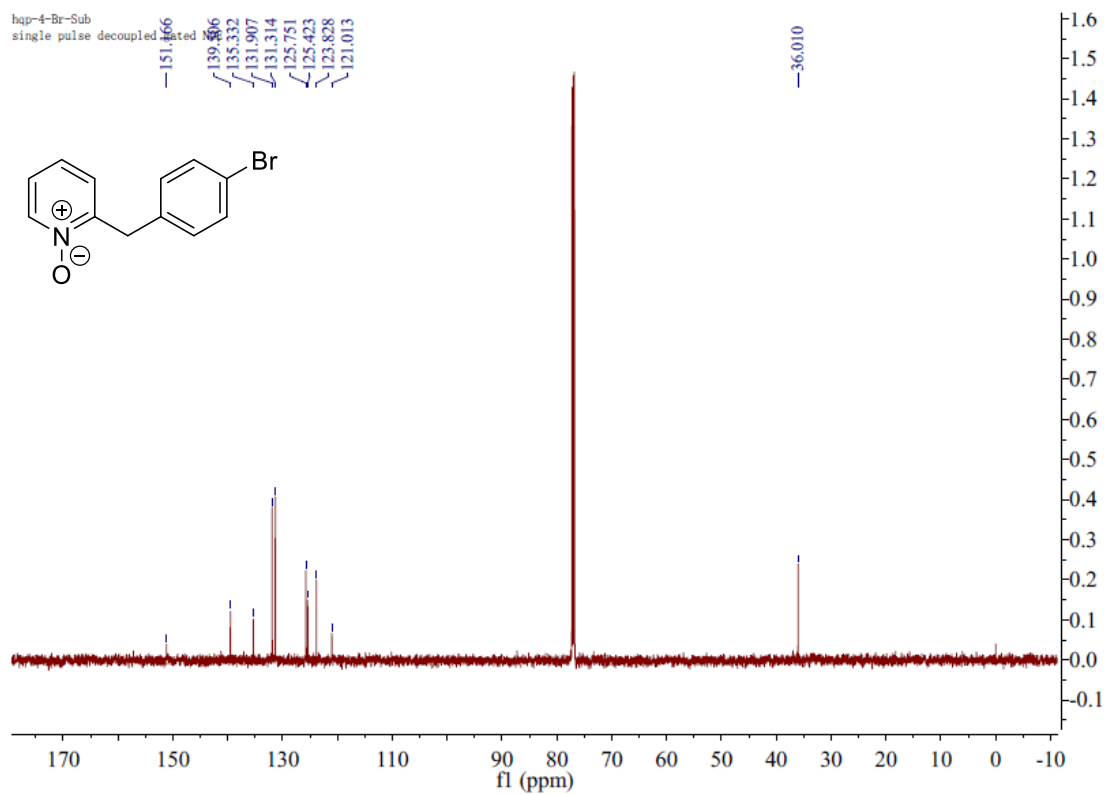

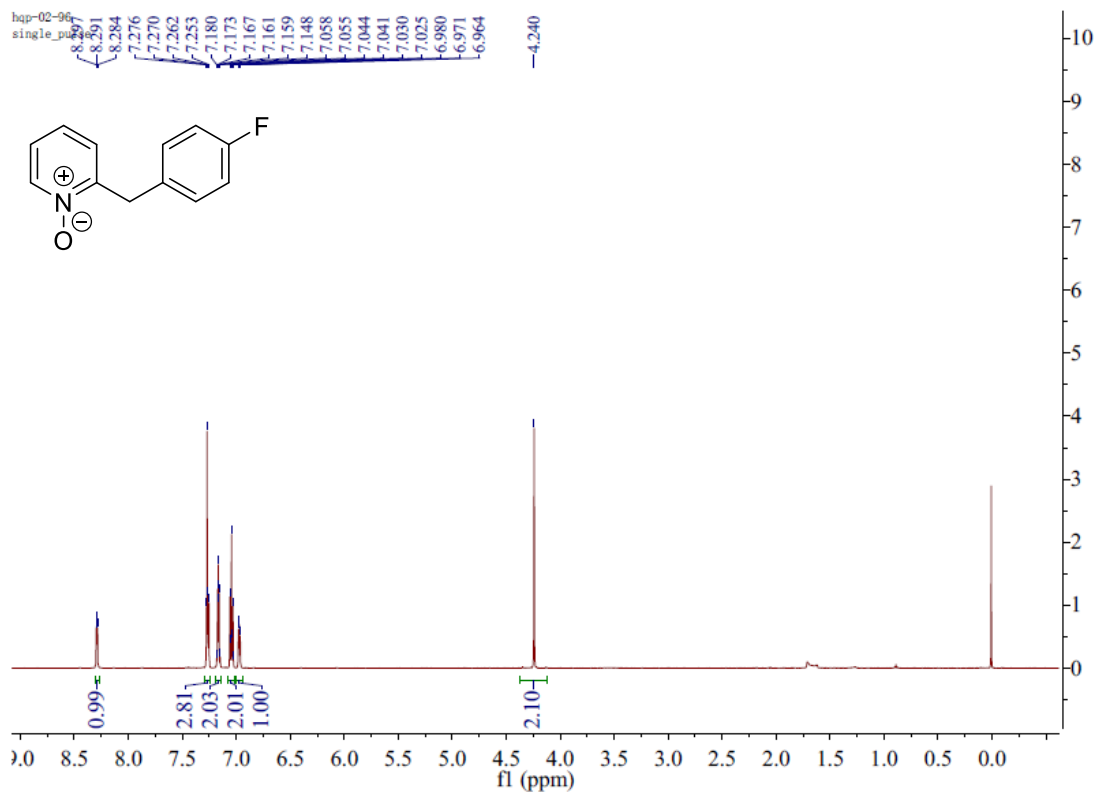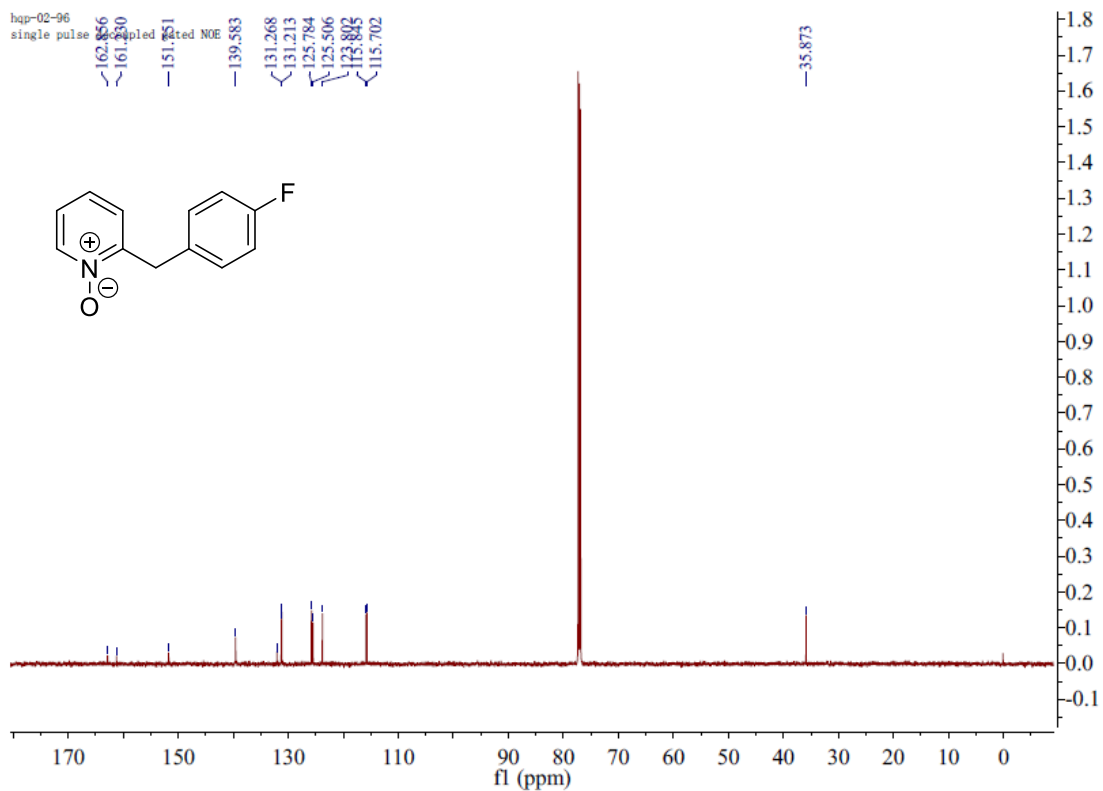

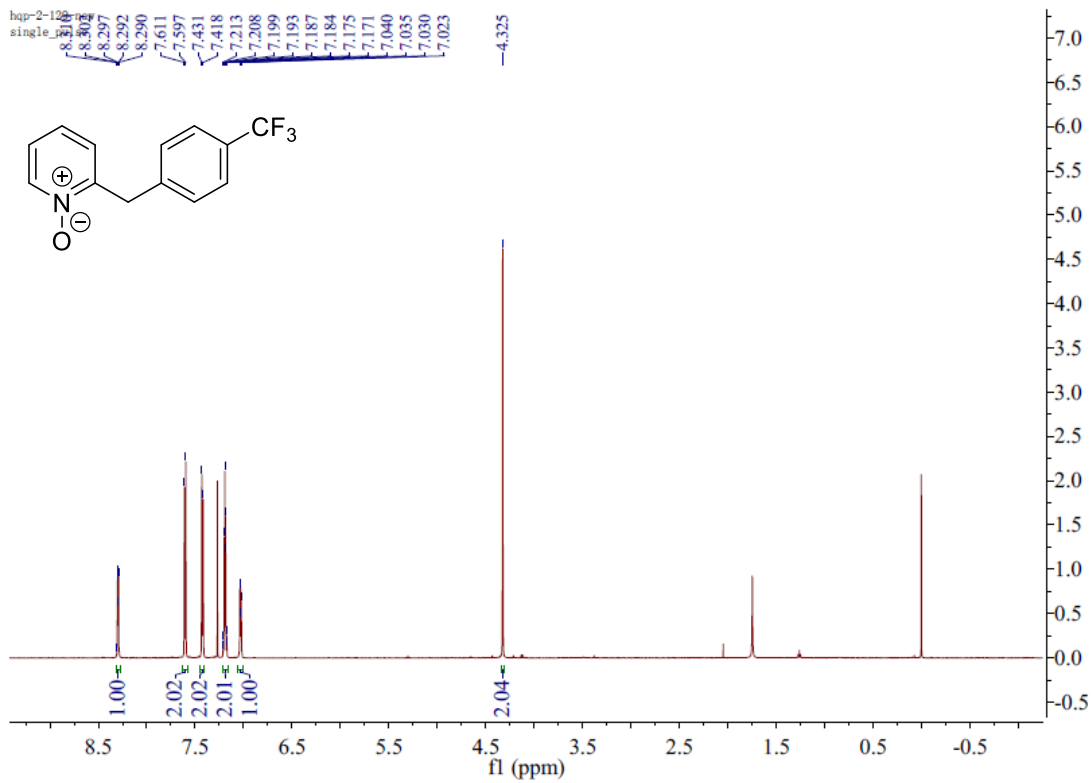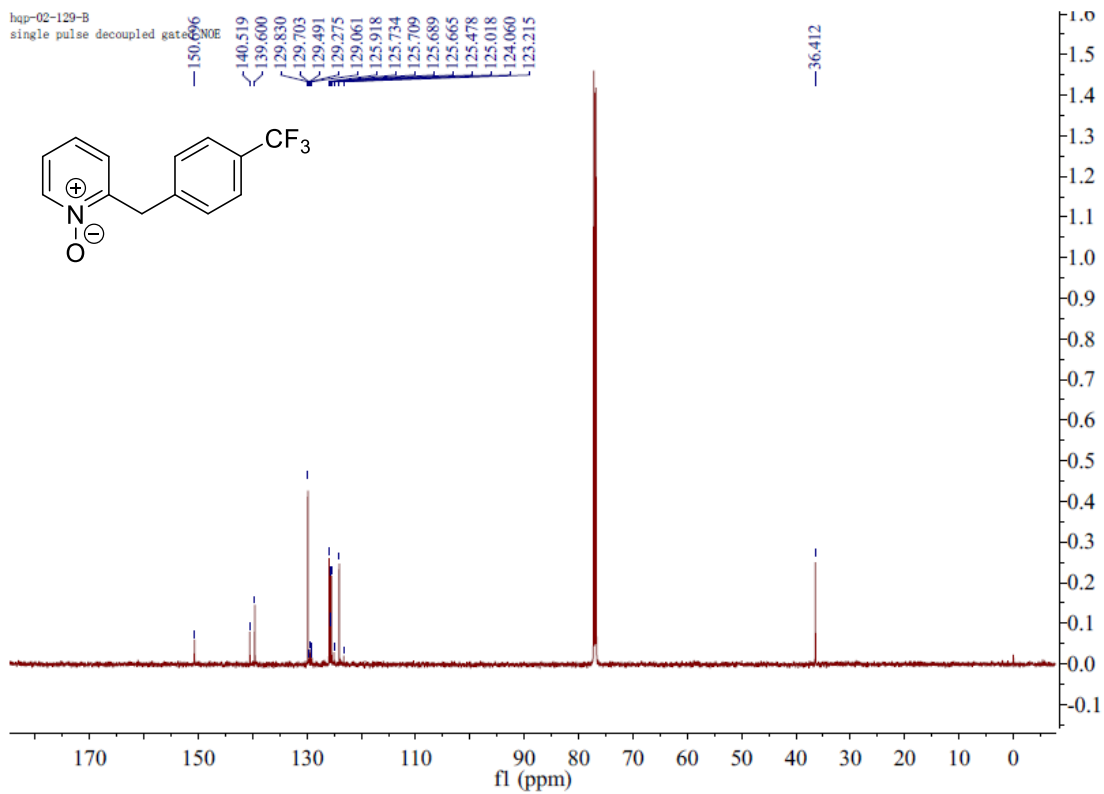



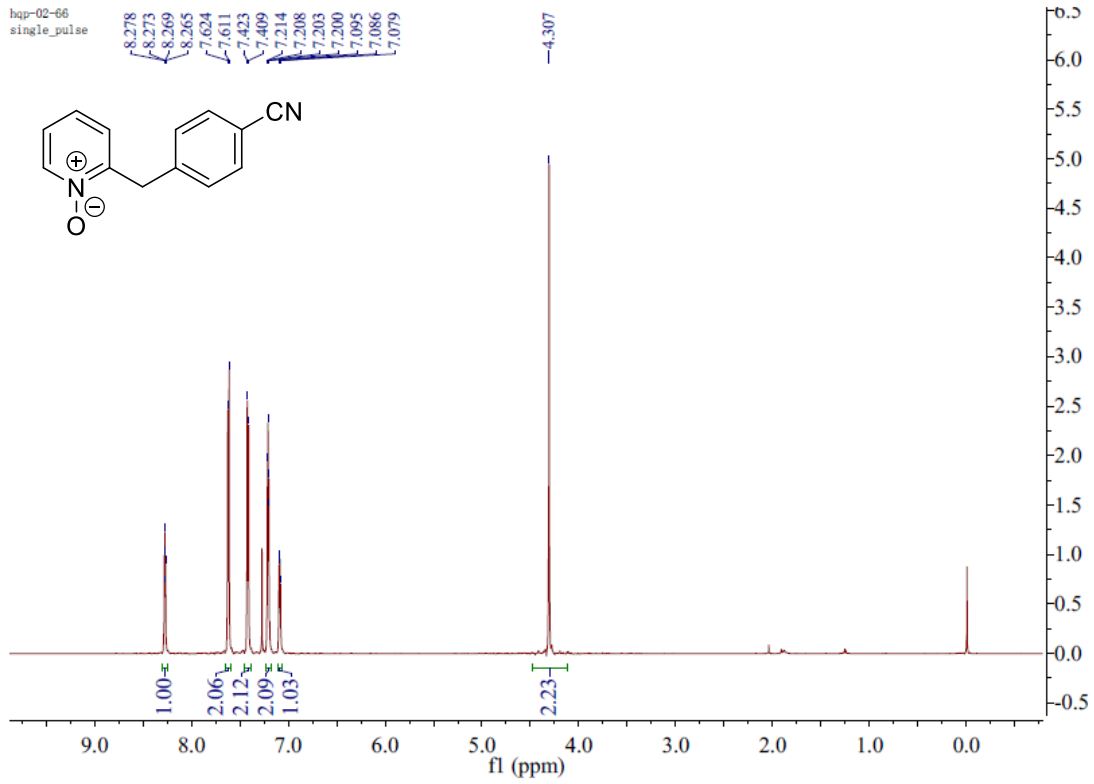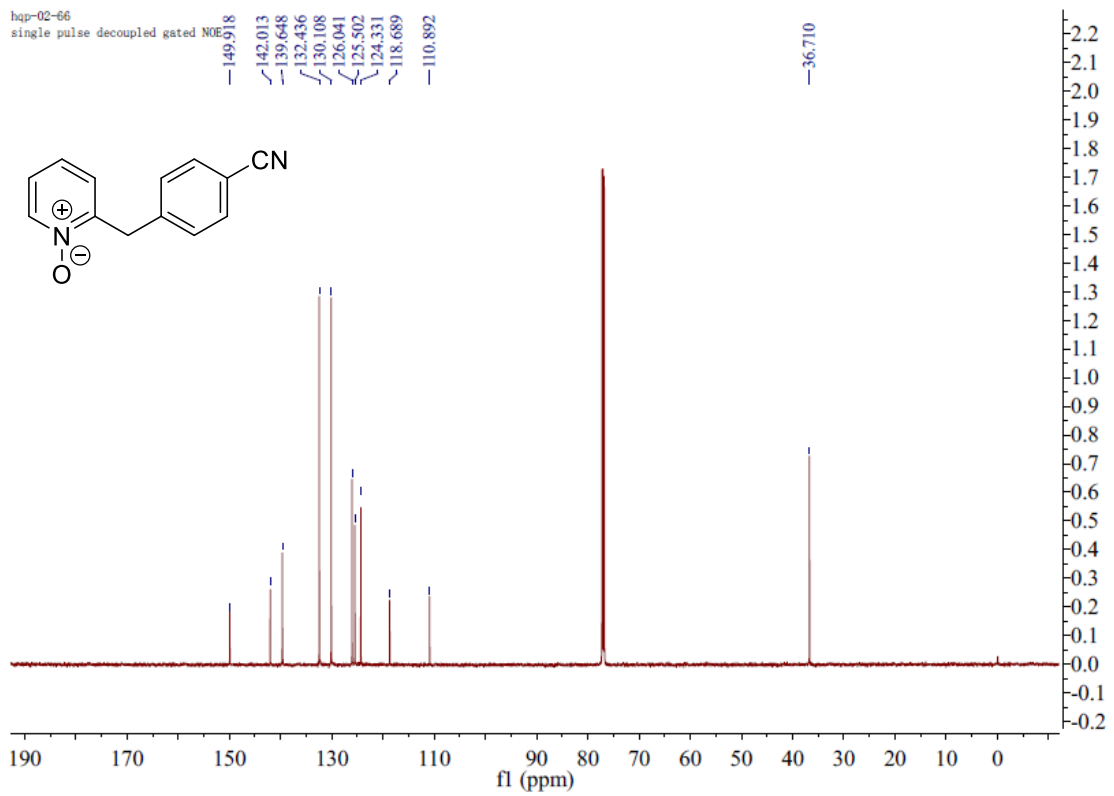

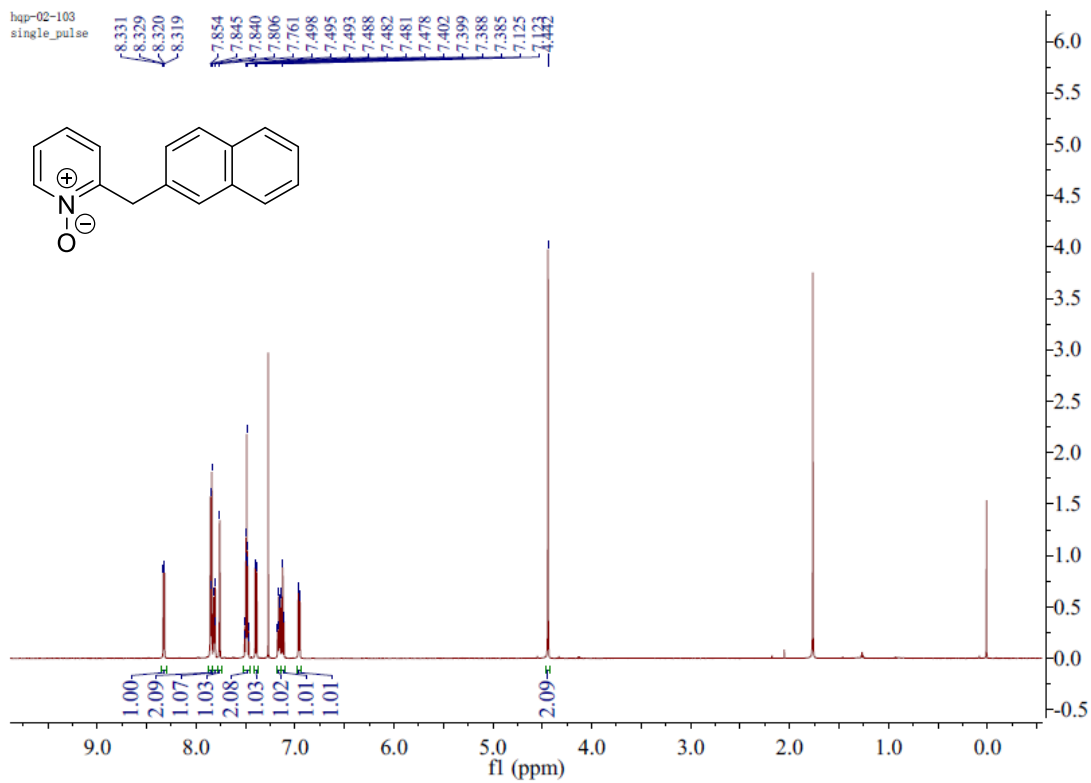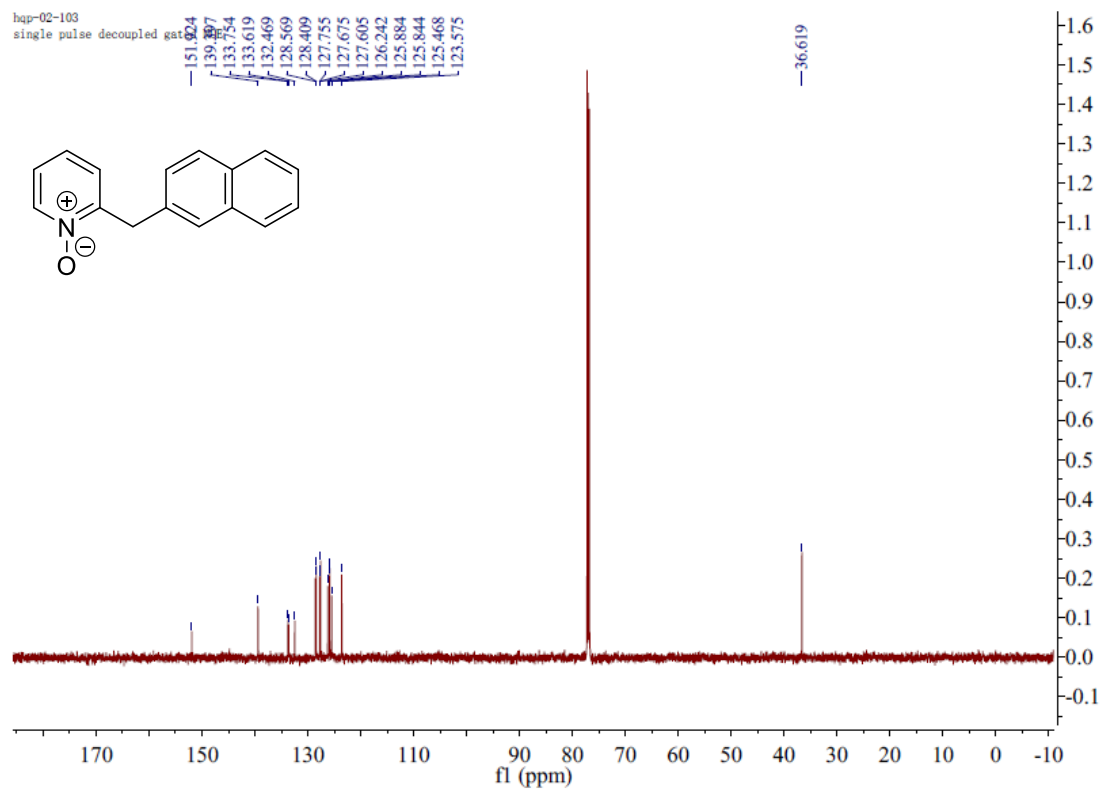

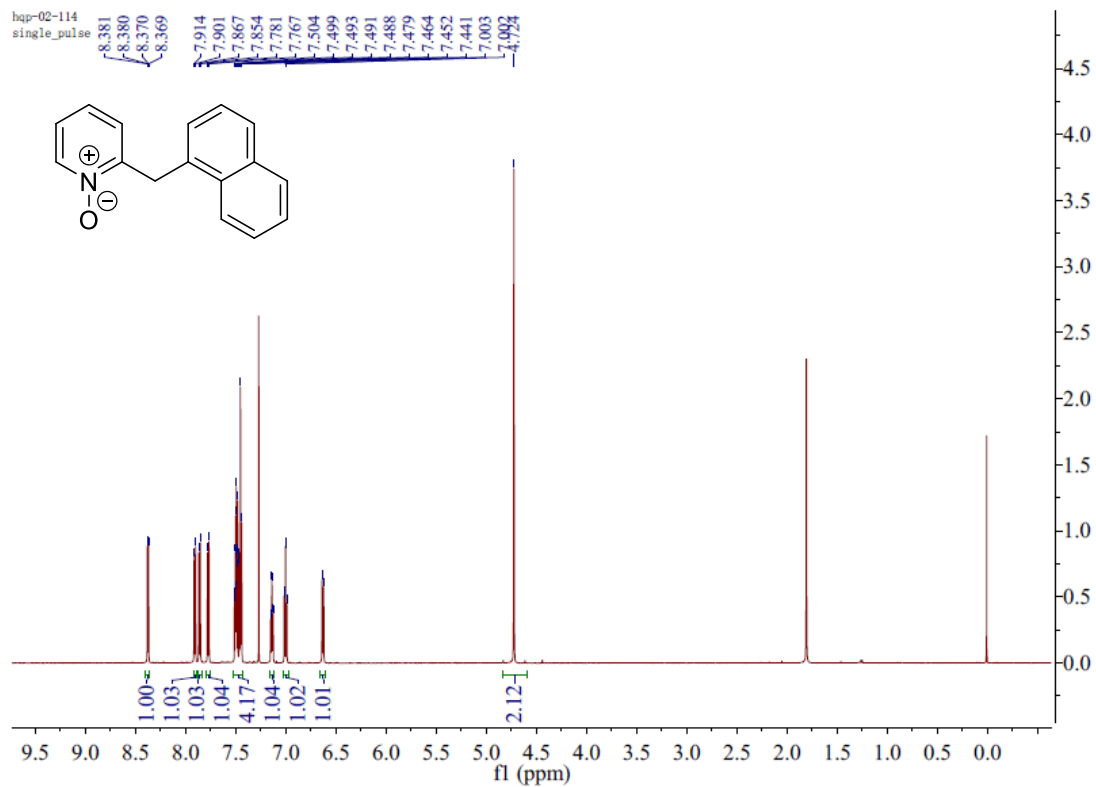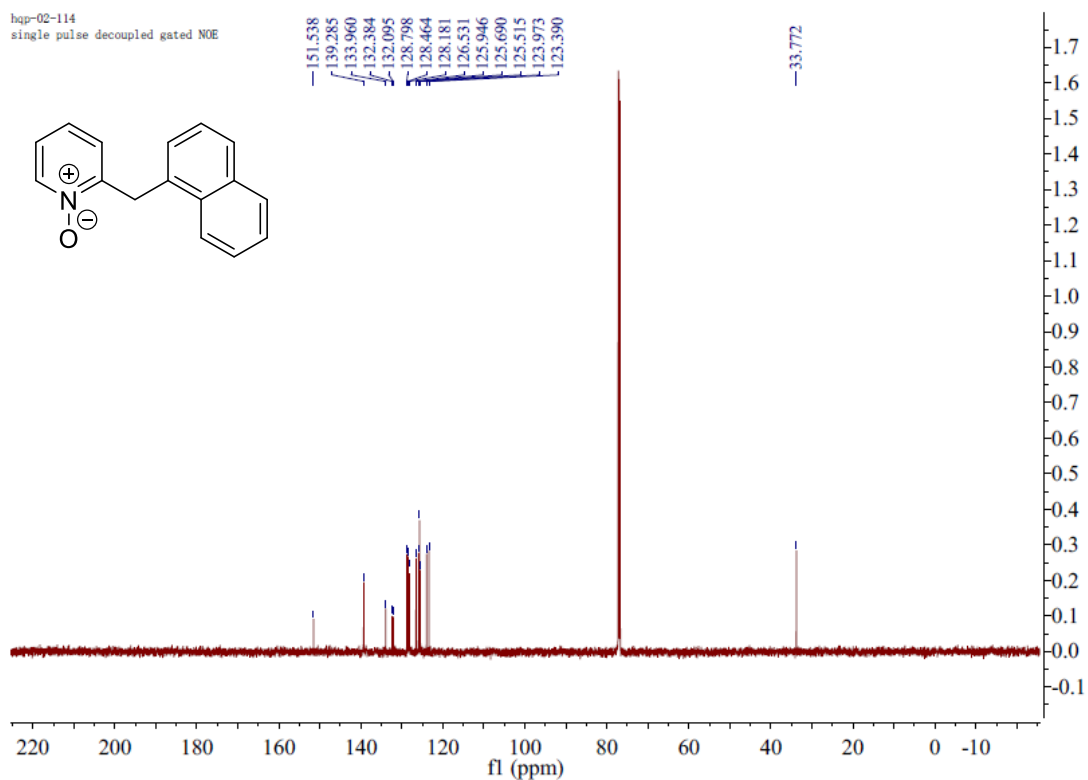

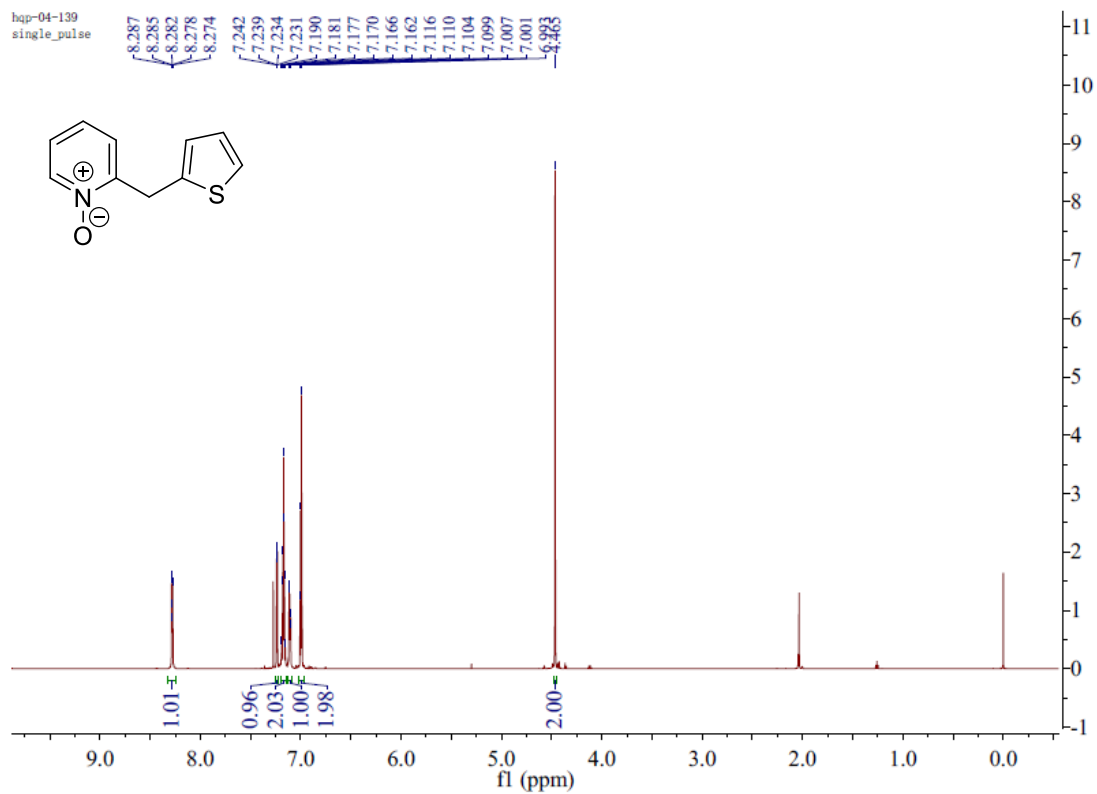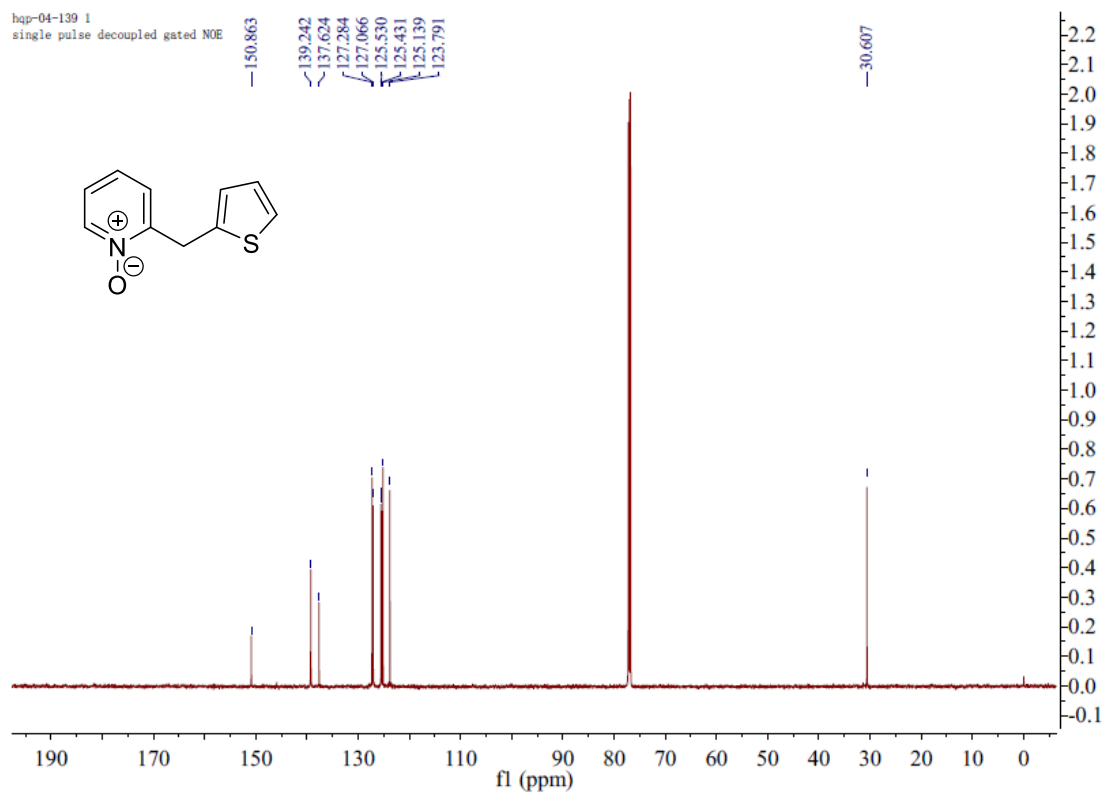

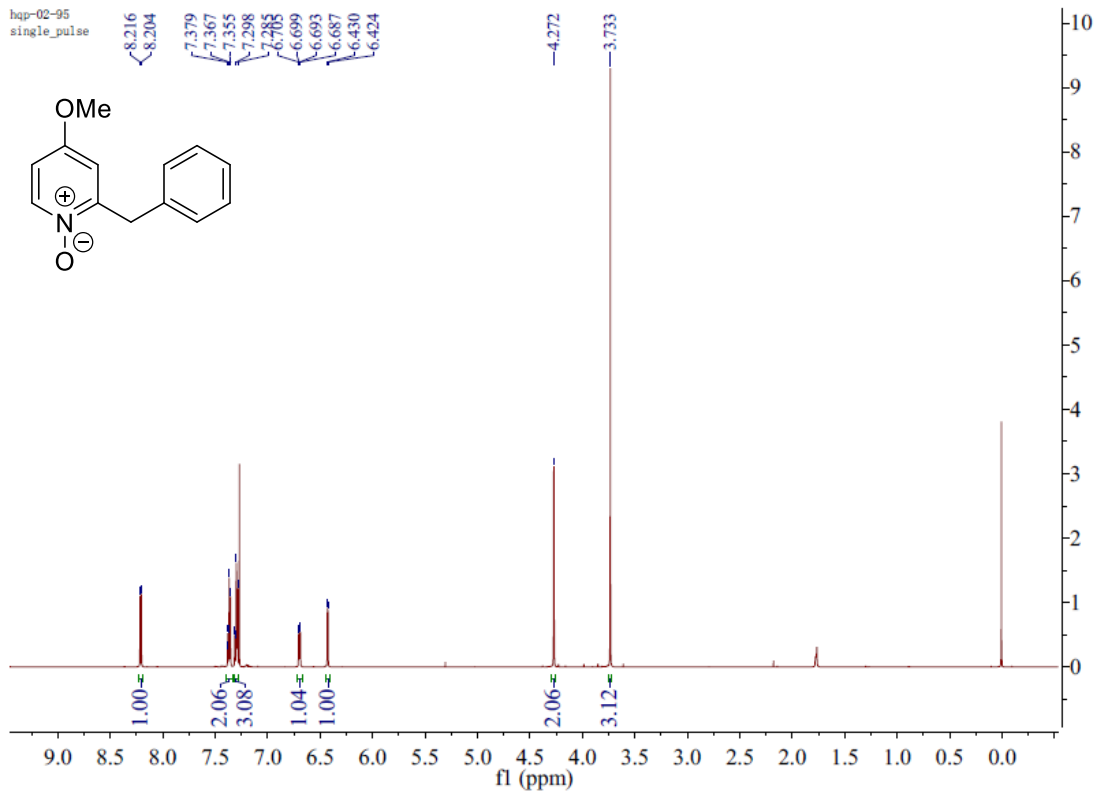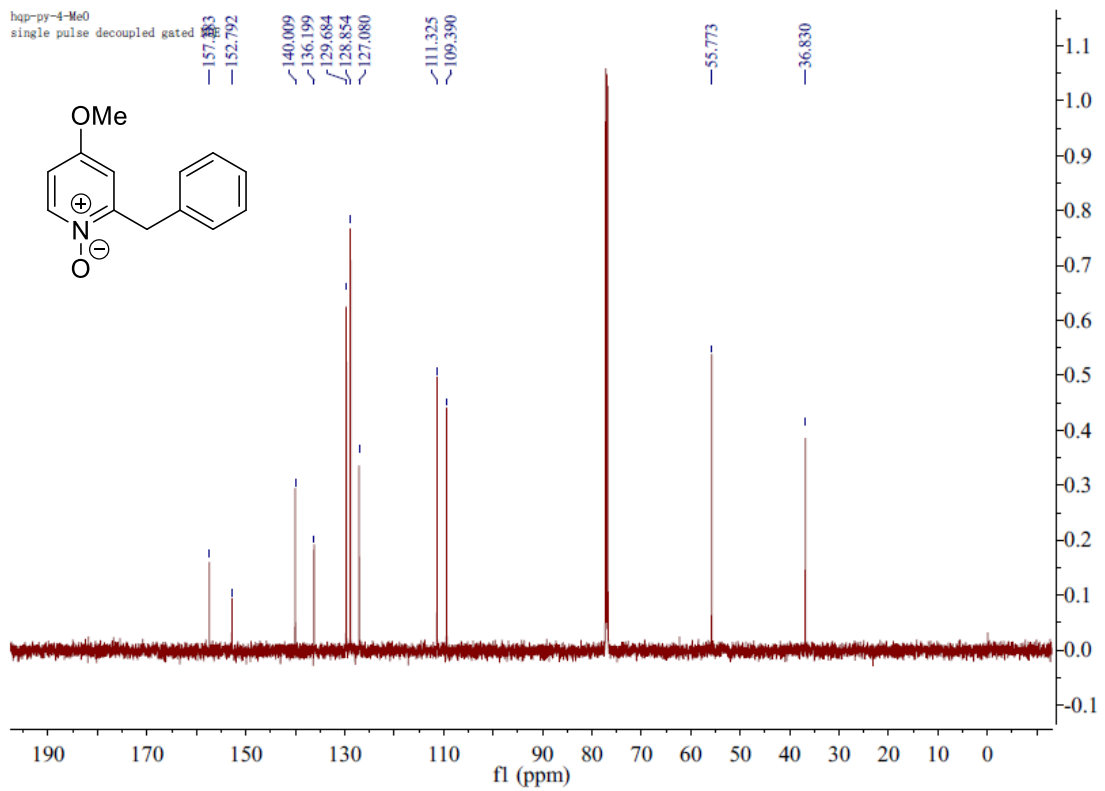

hqp-02-161-A  
single\_pulse

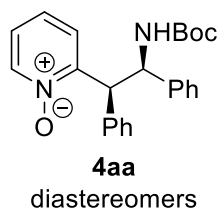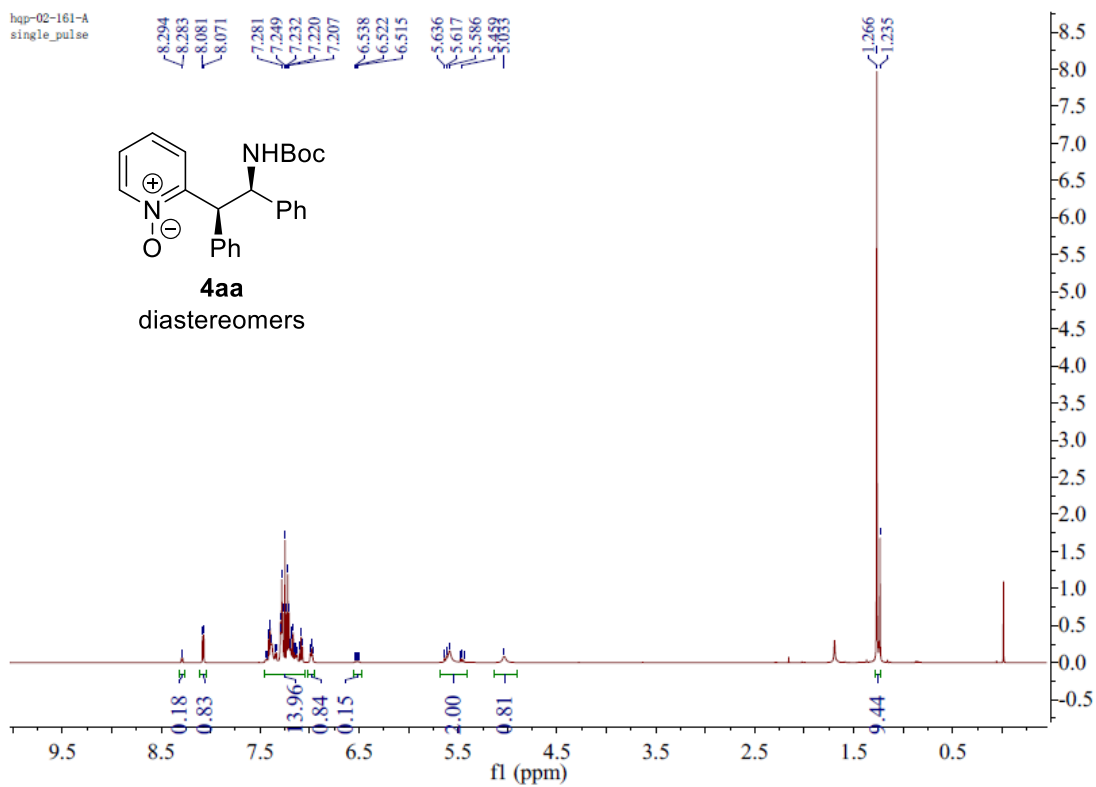

hqp-02-161-A  
single\_pulse decouple

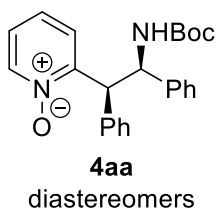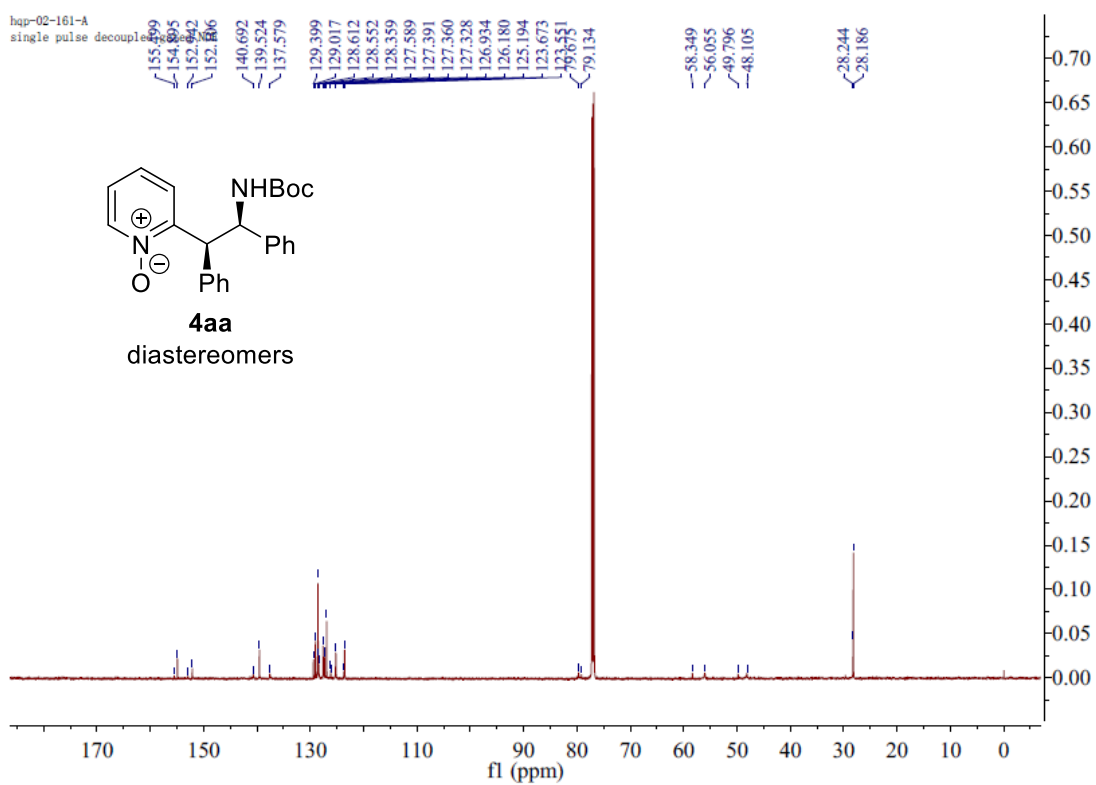

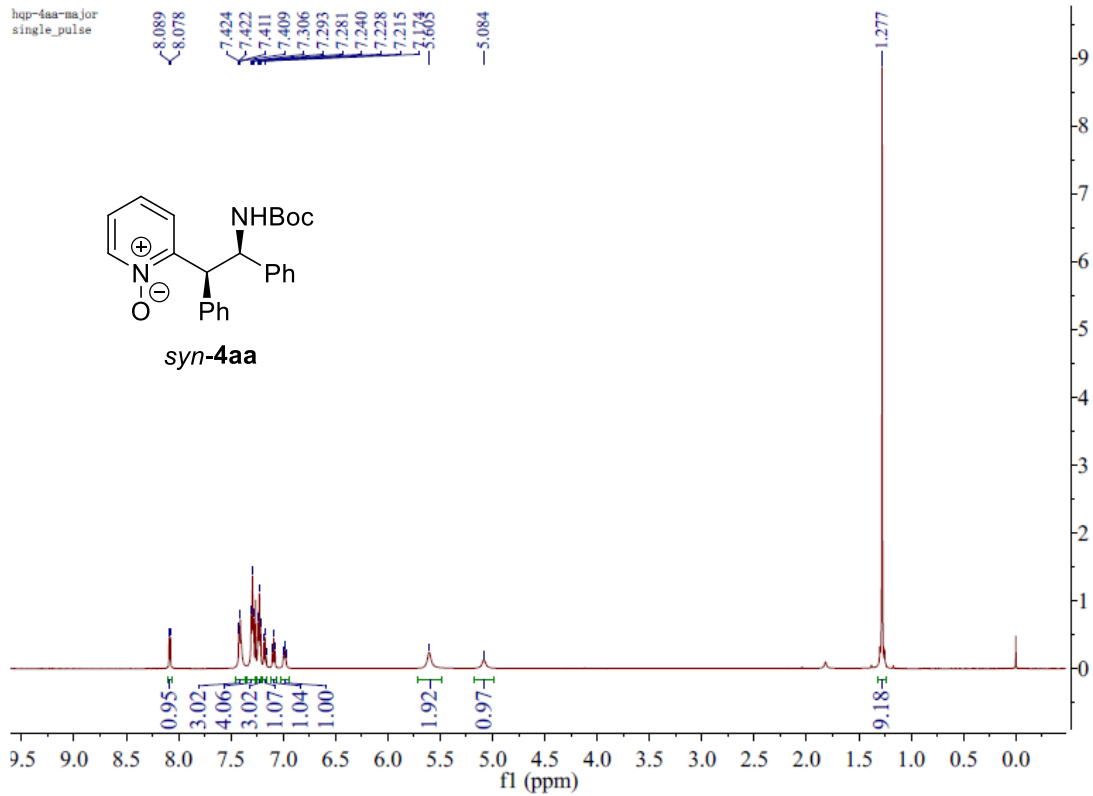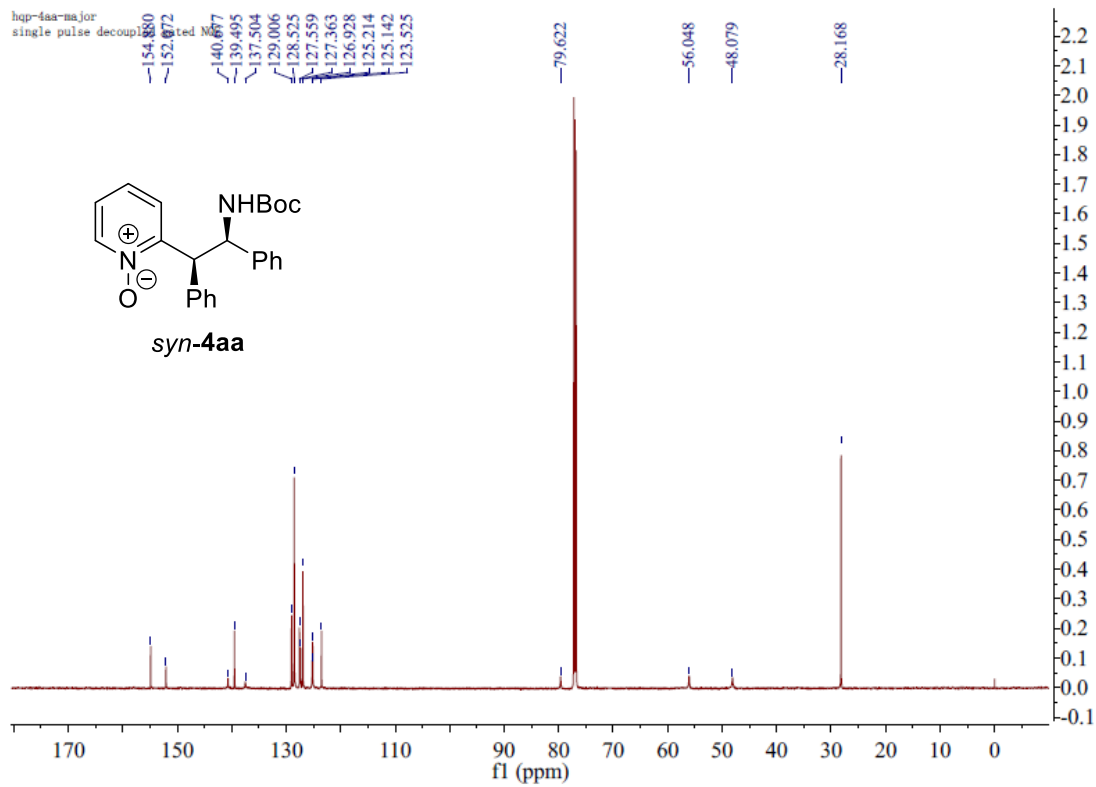

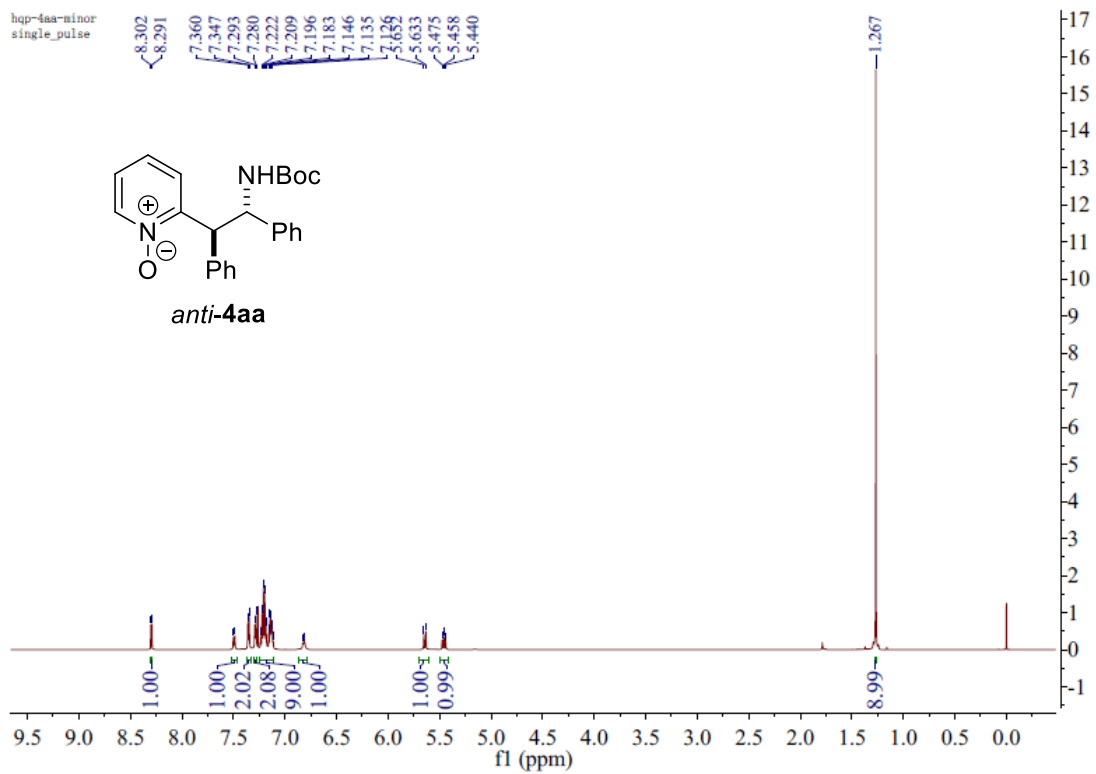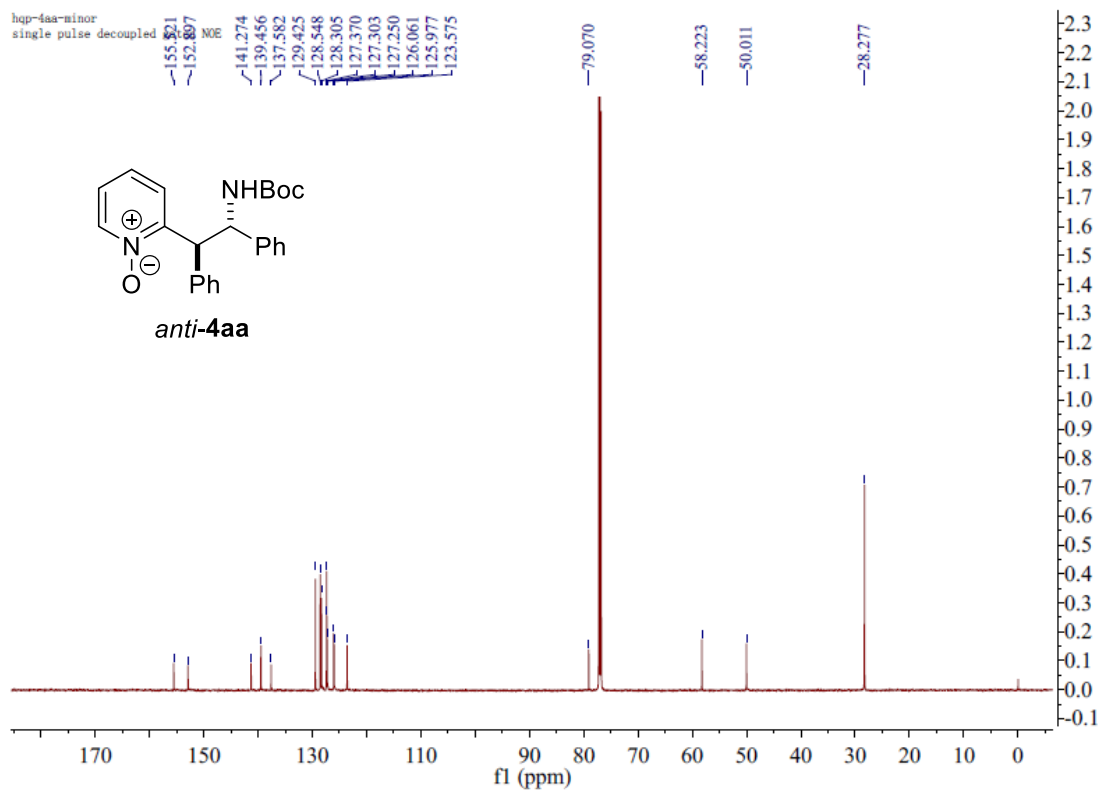



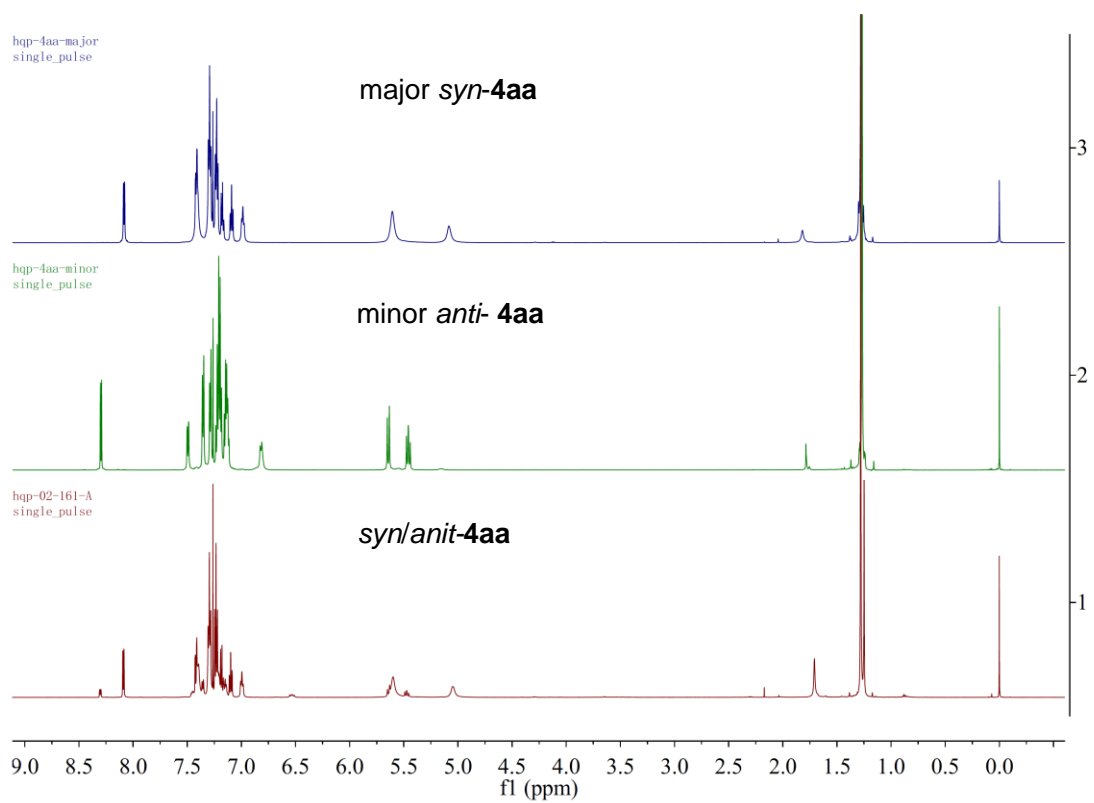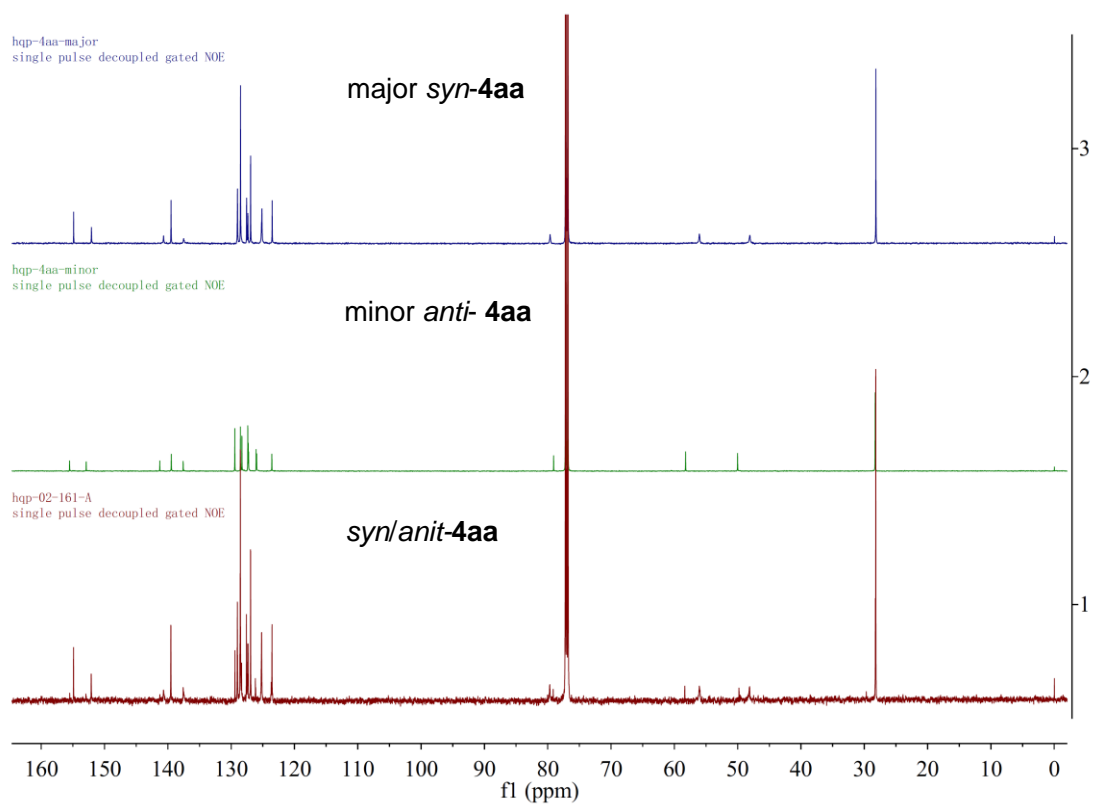

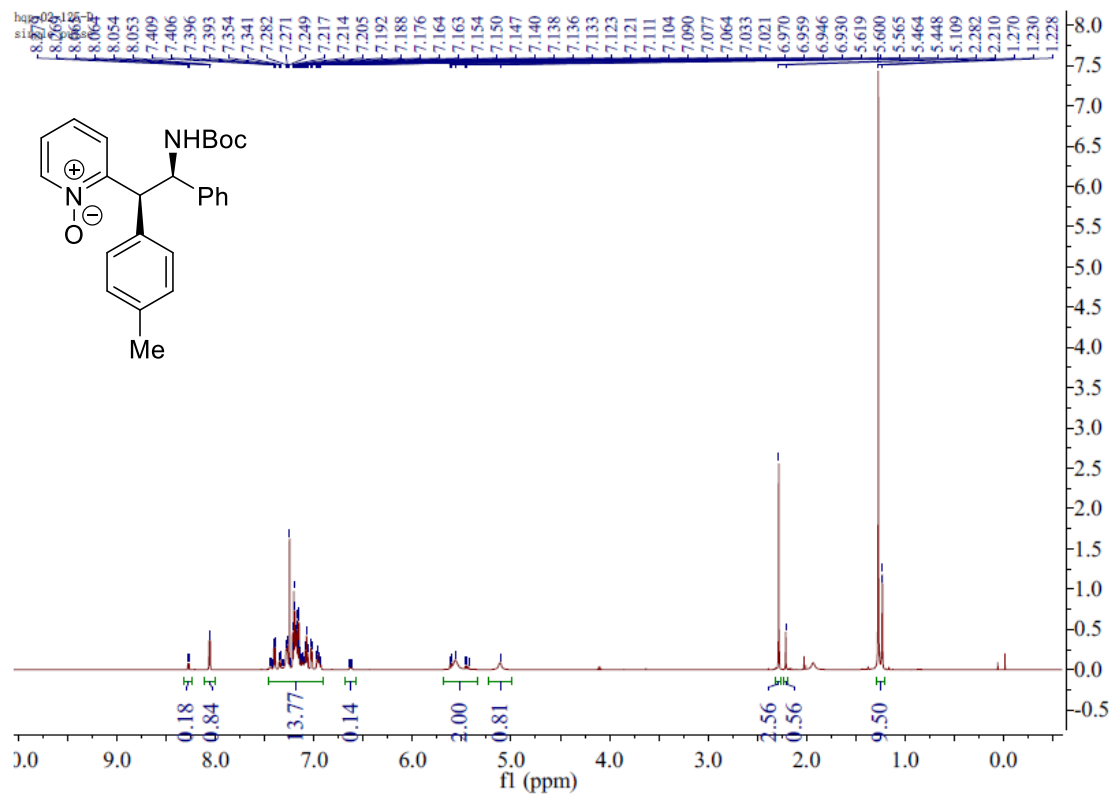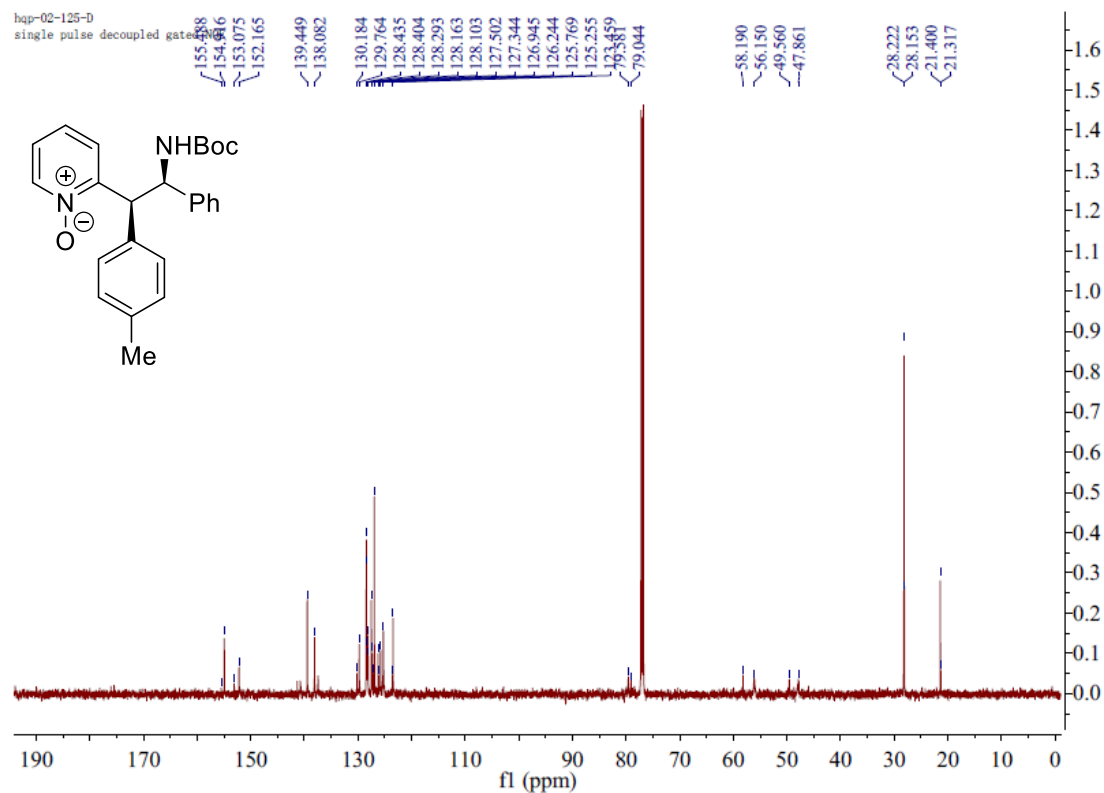

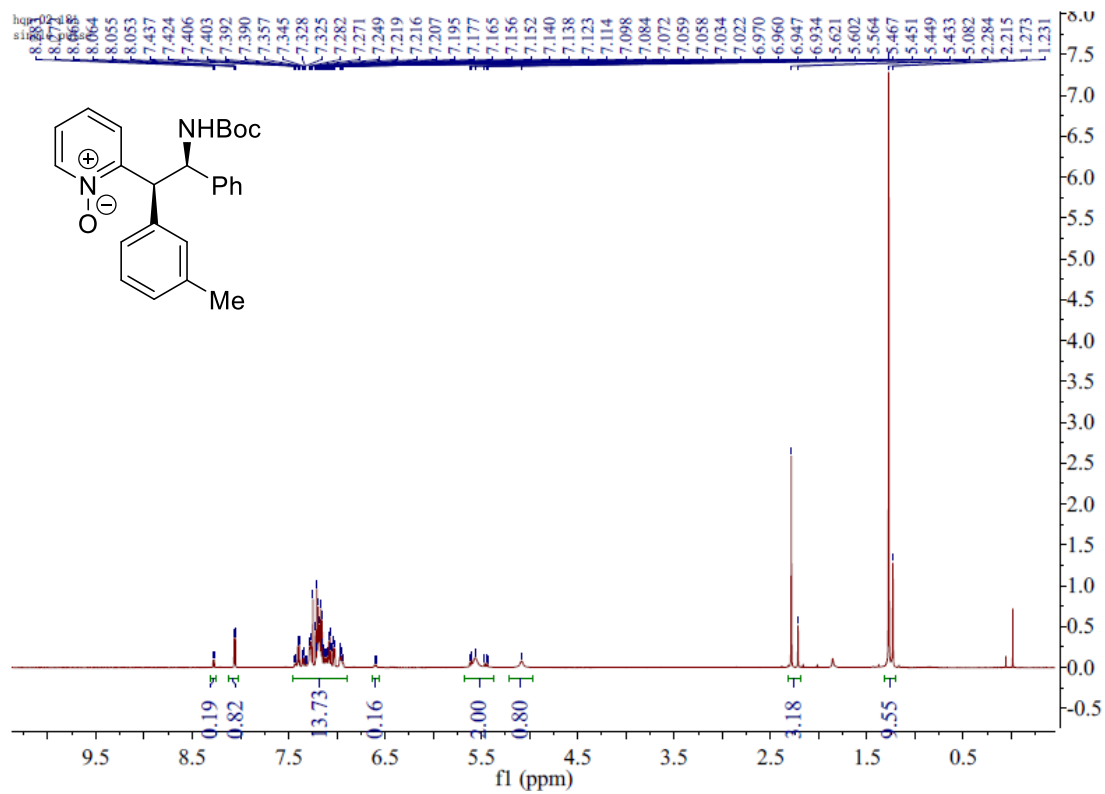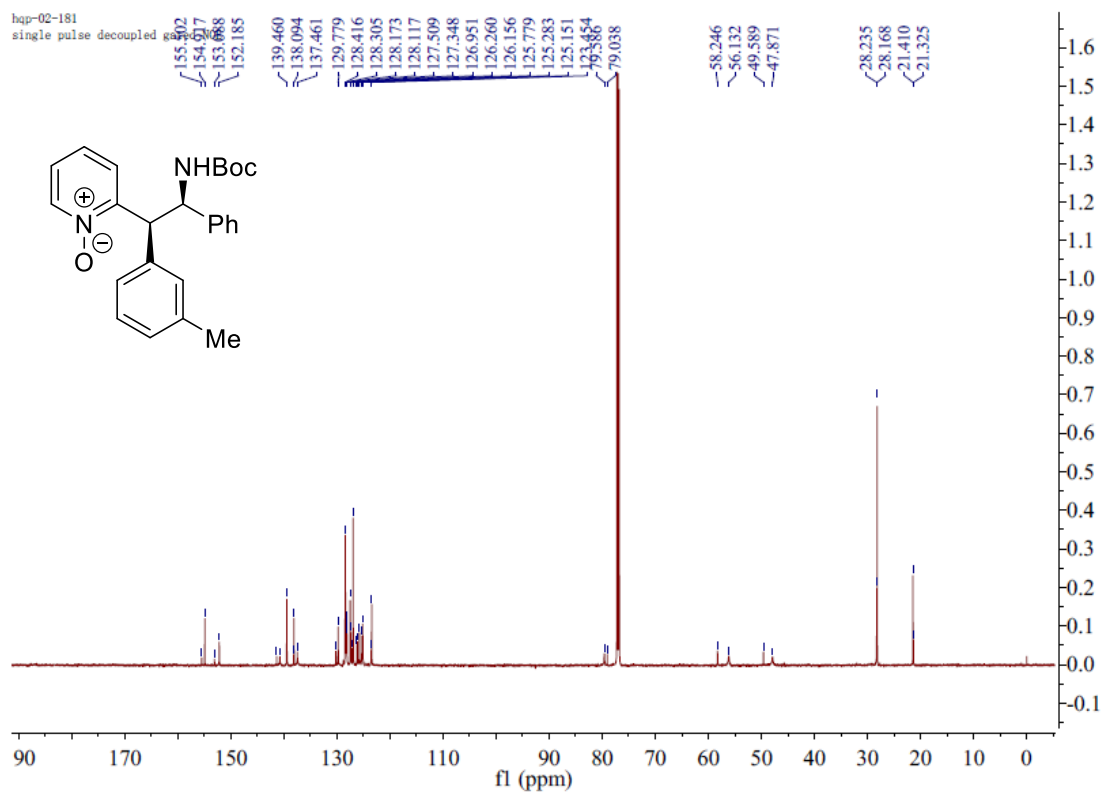

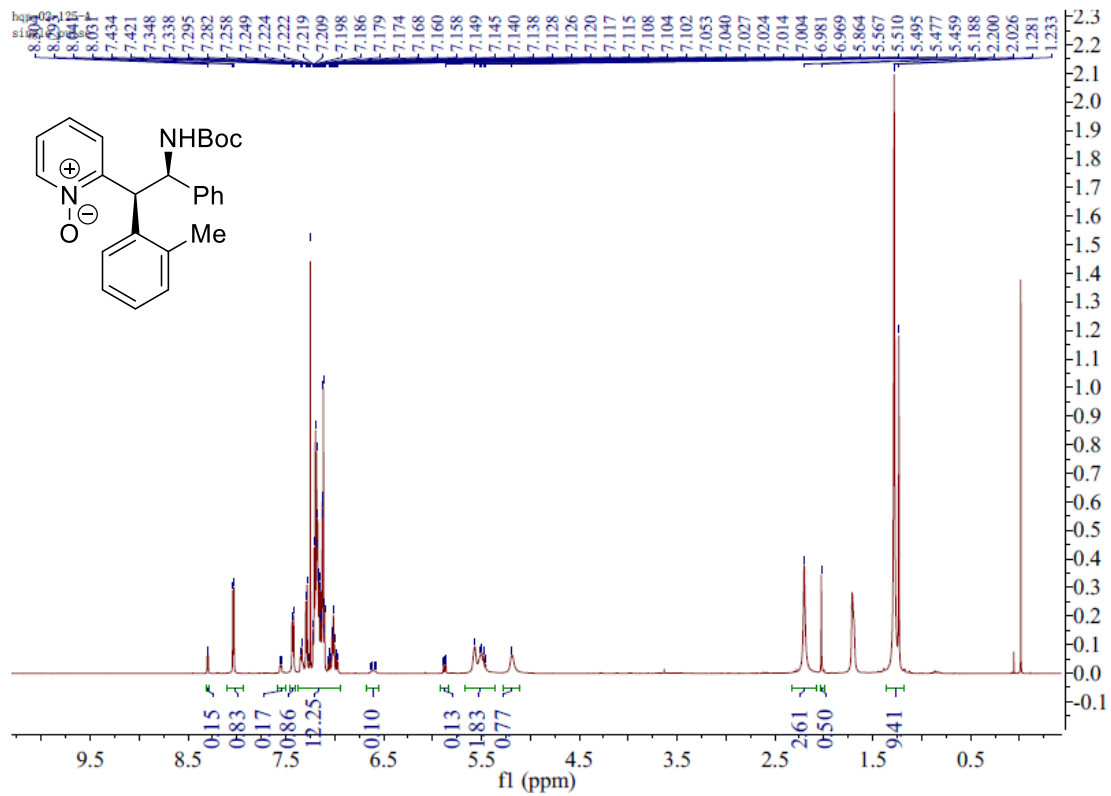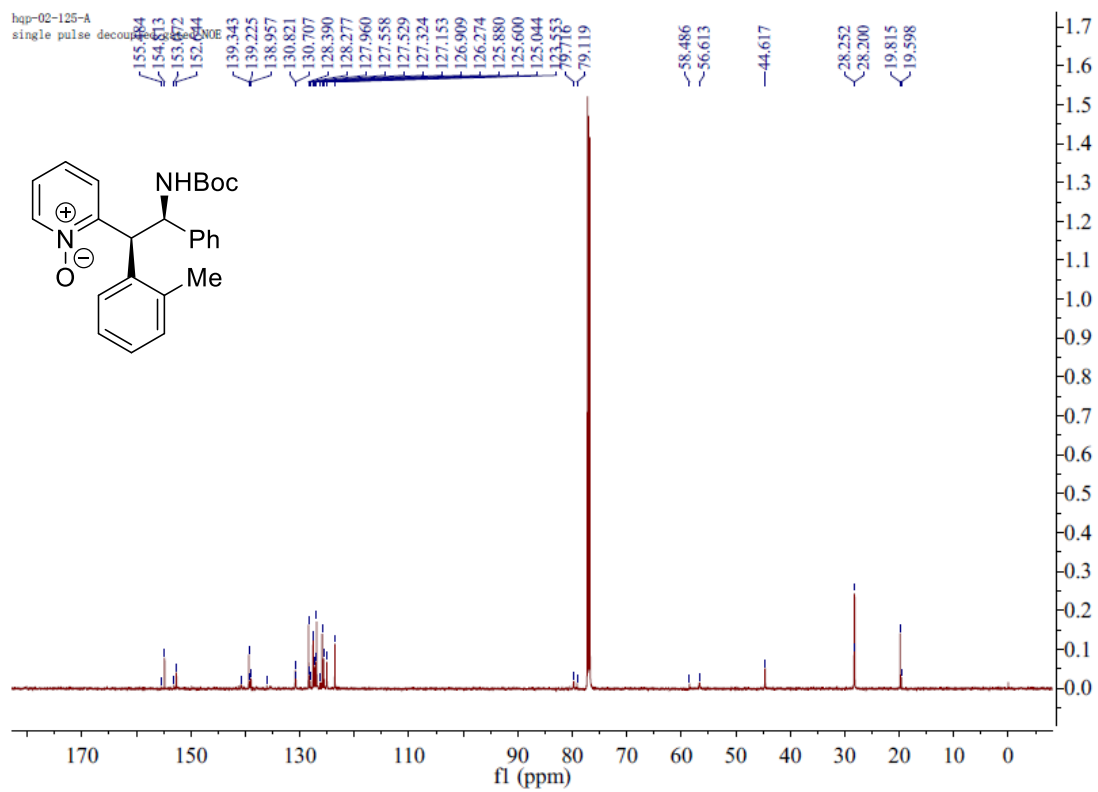

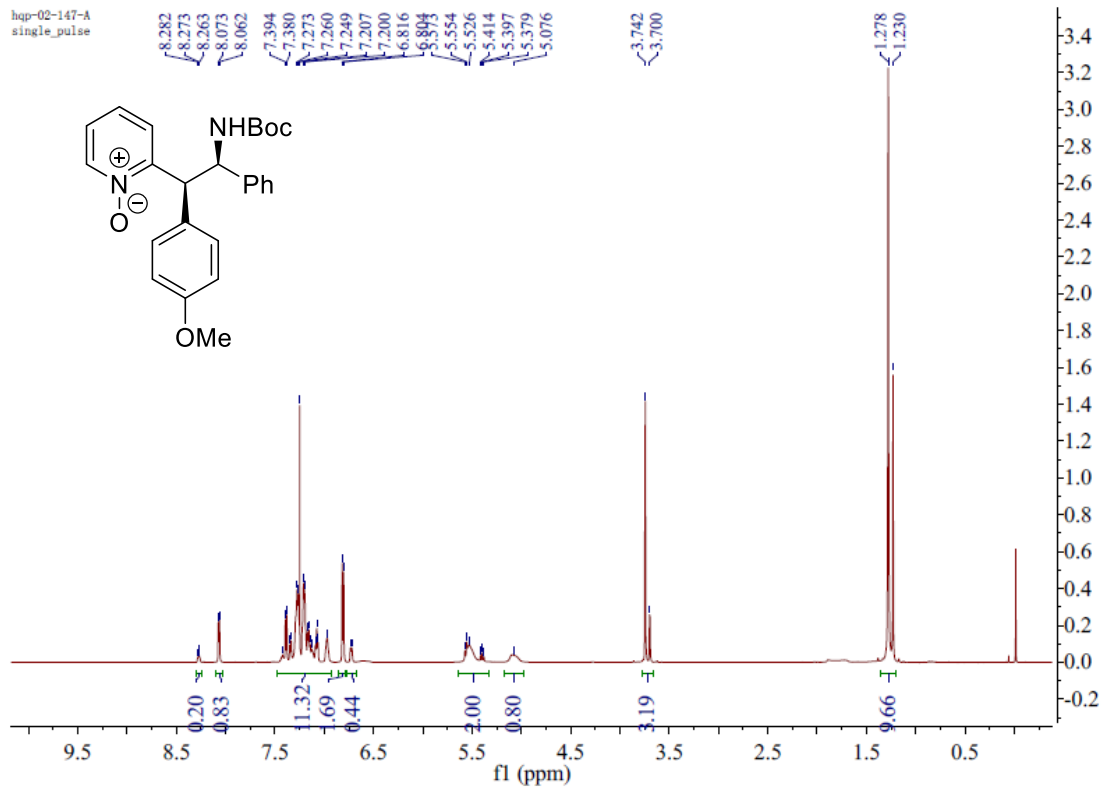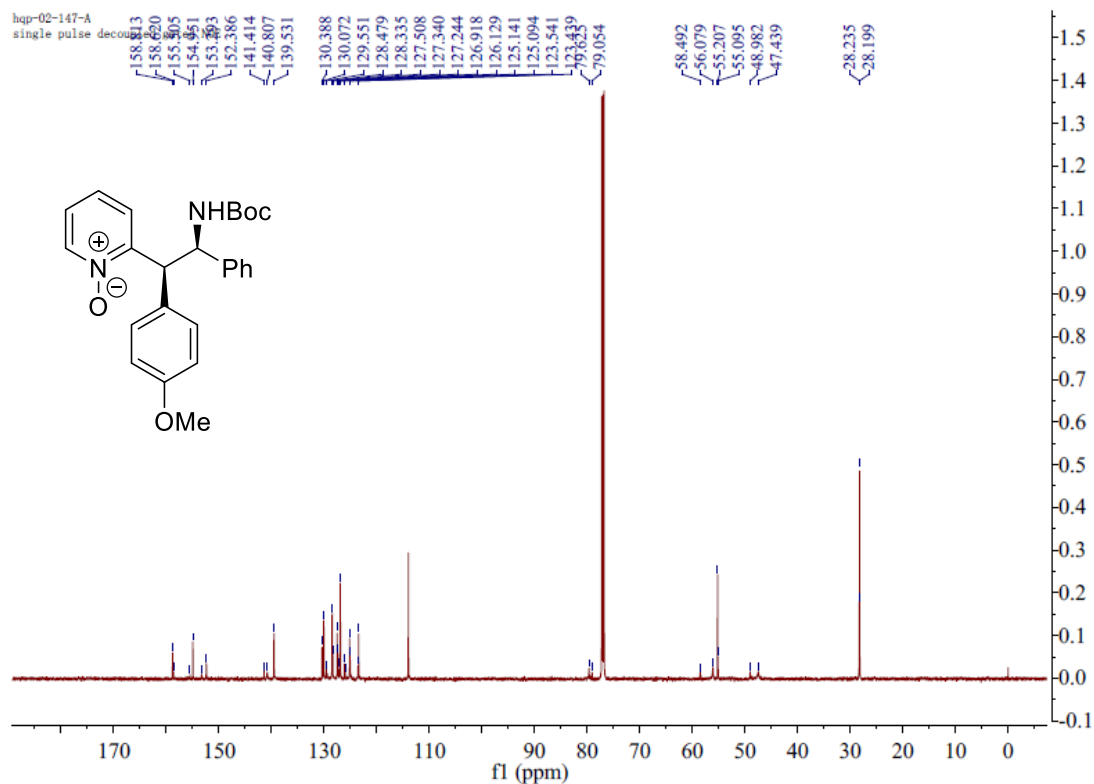

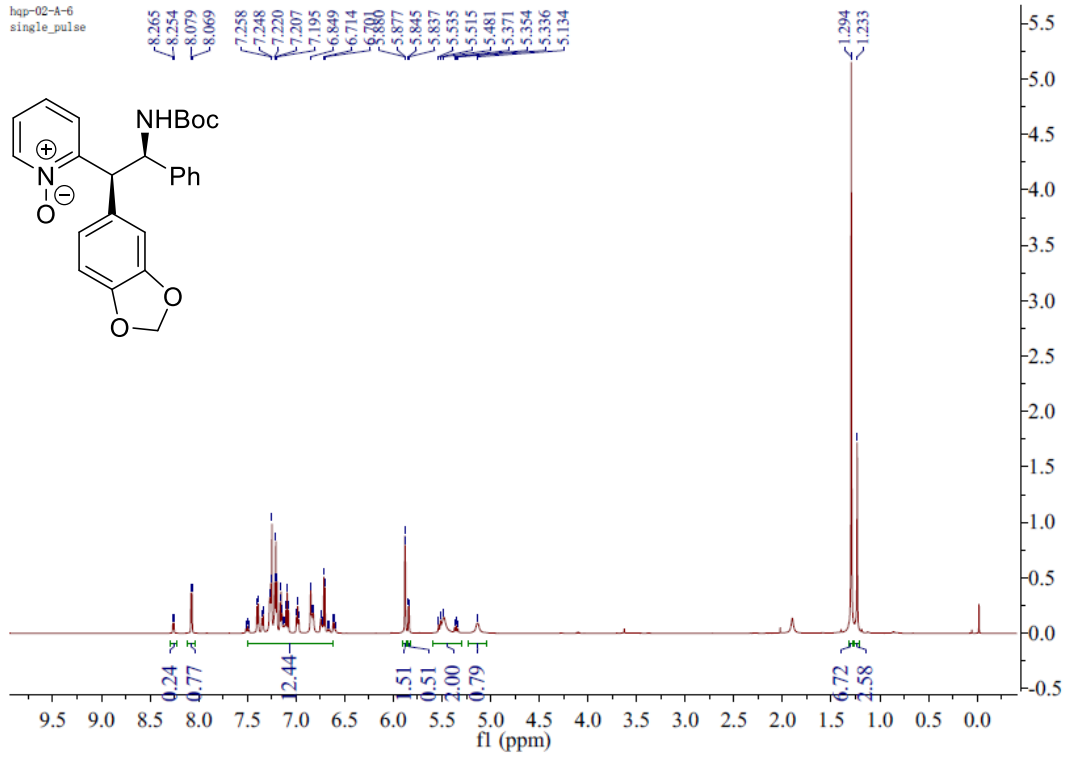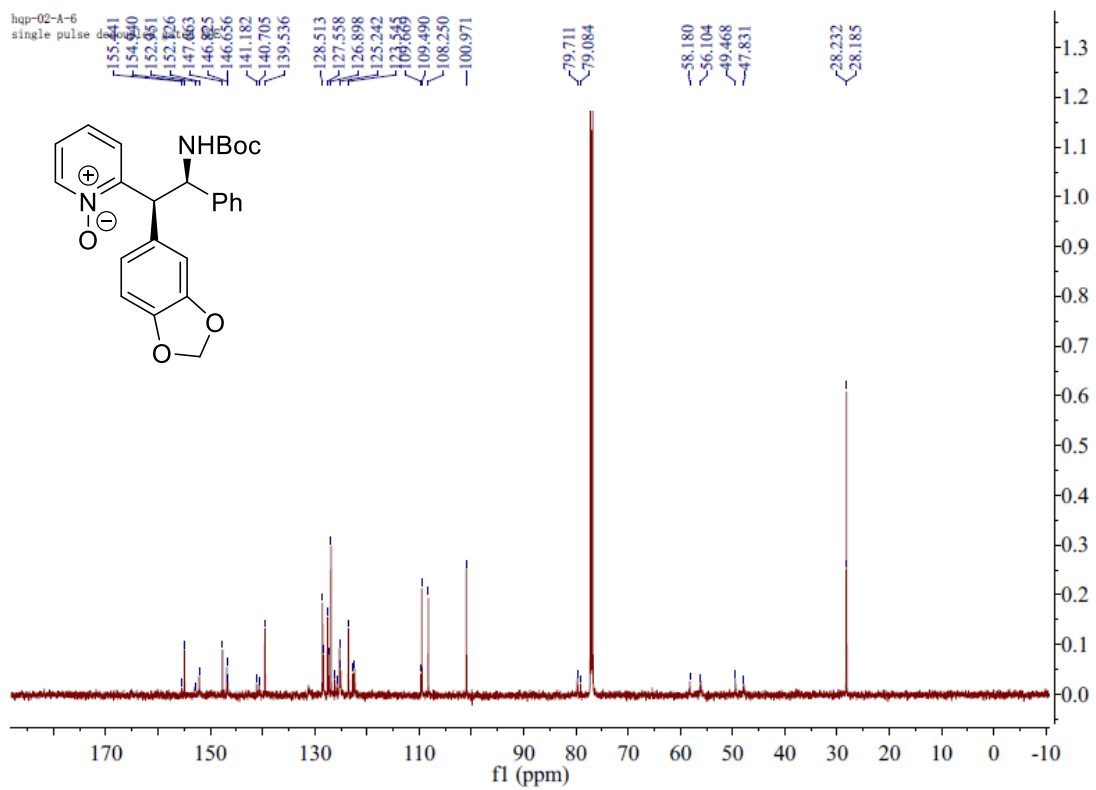

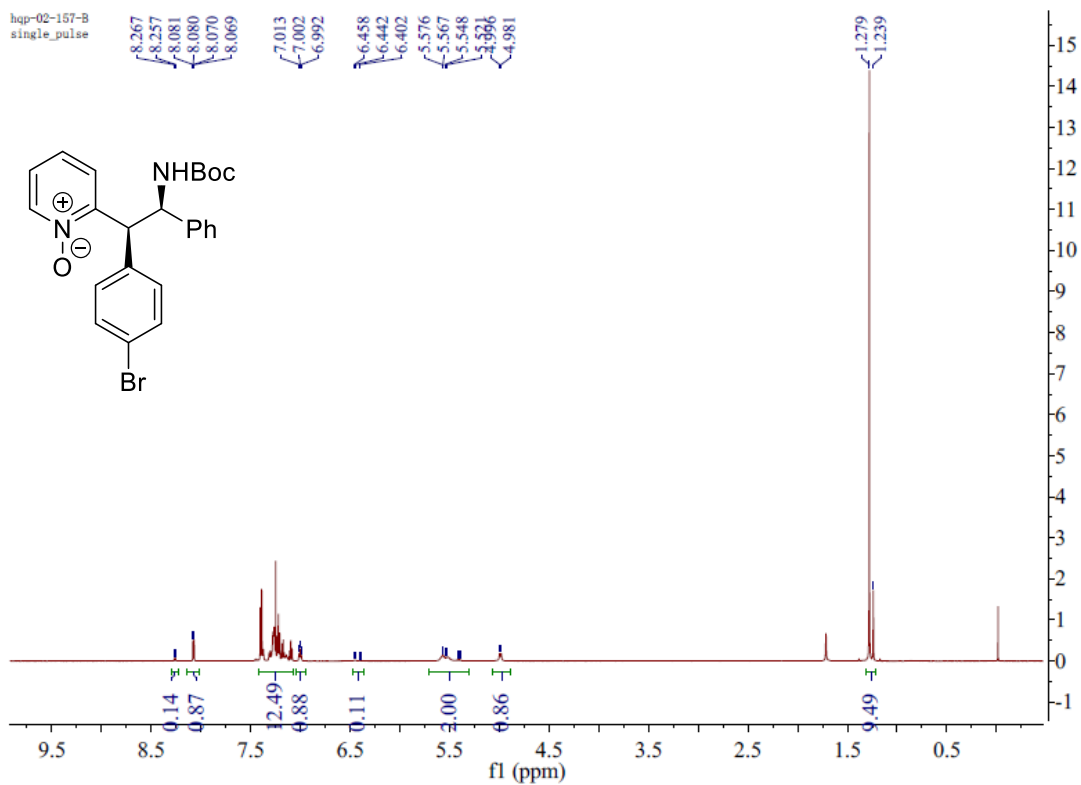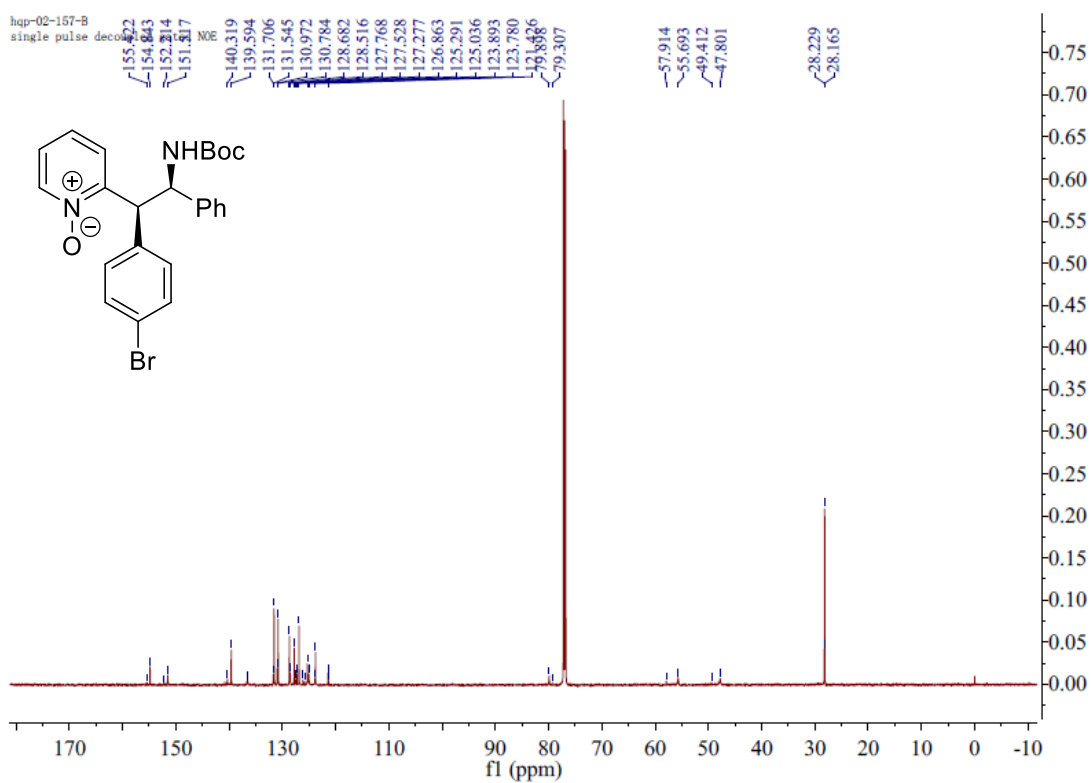

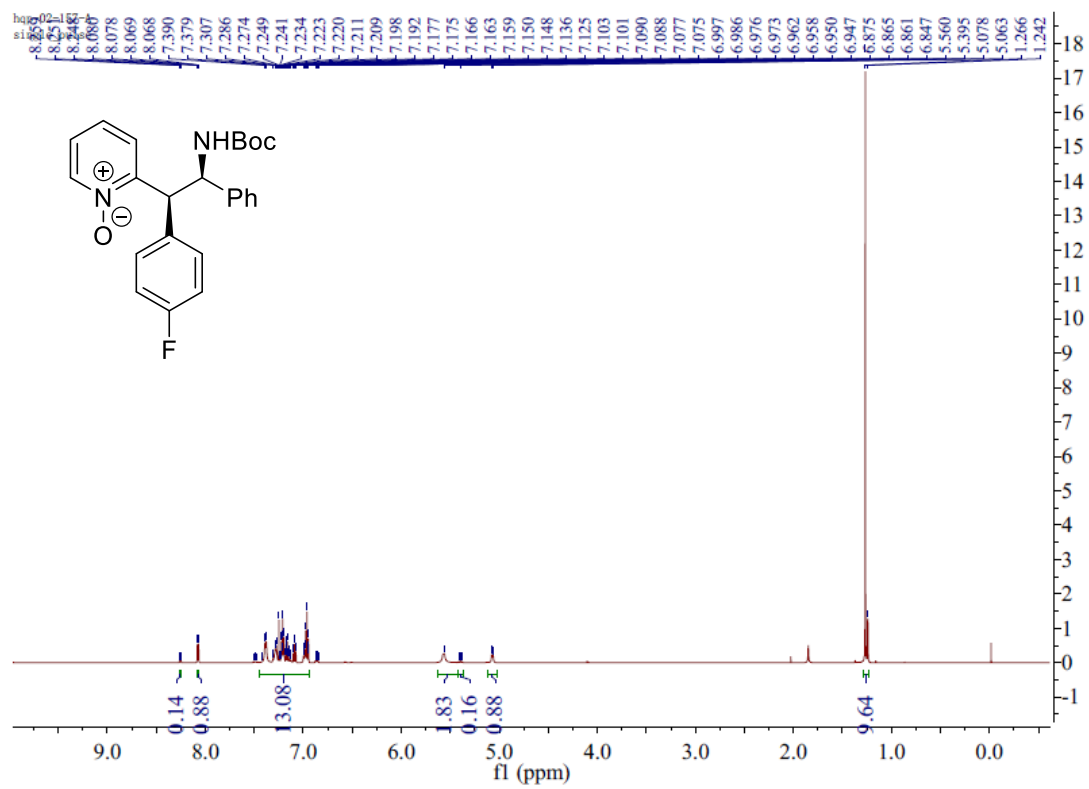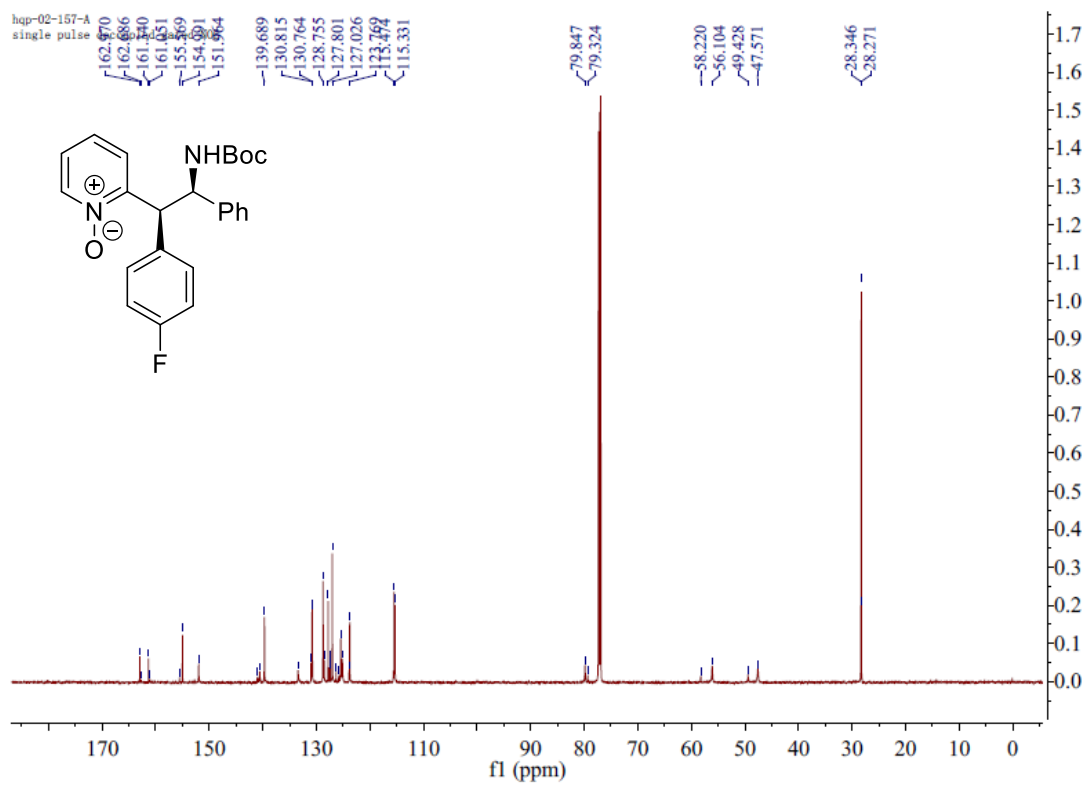



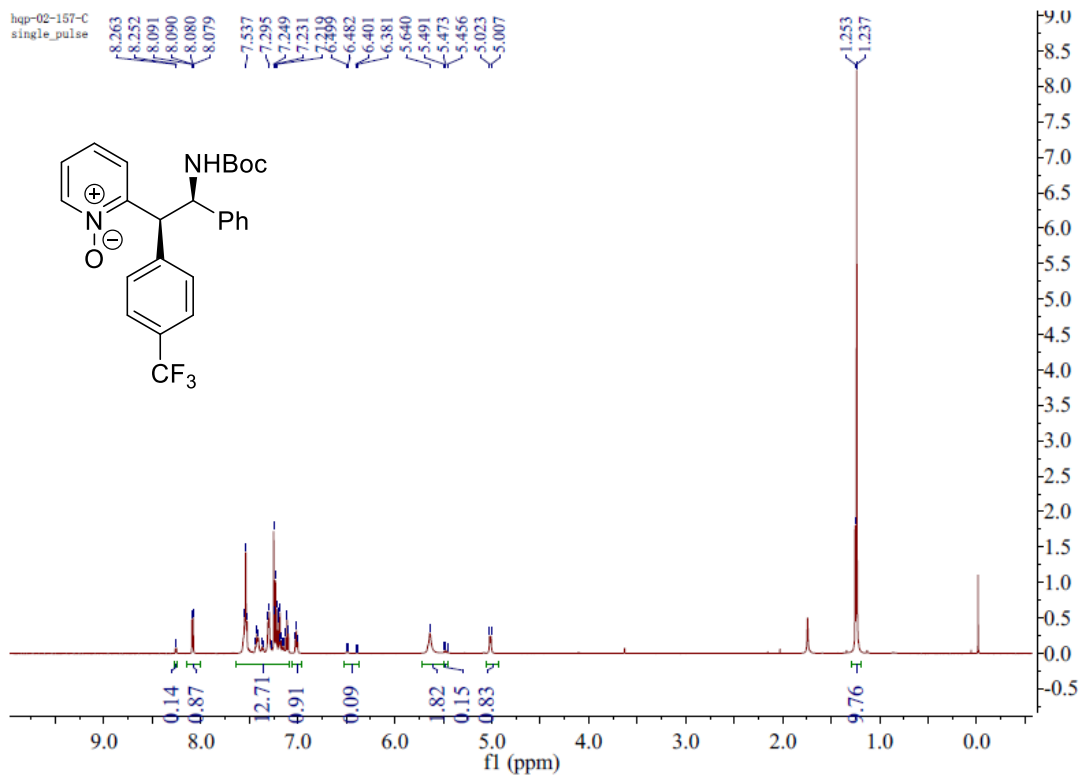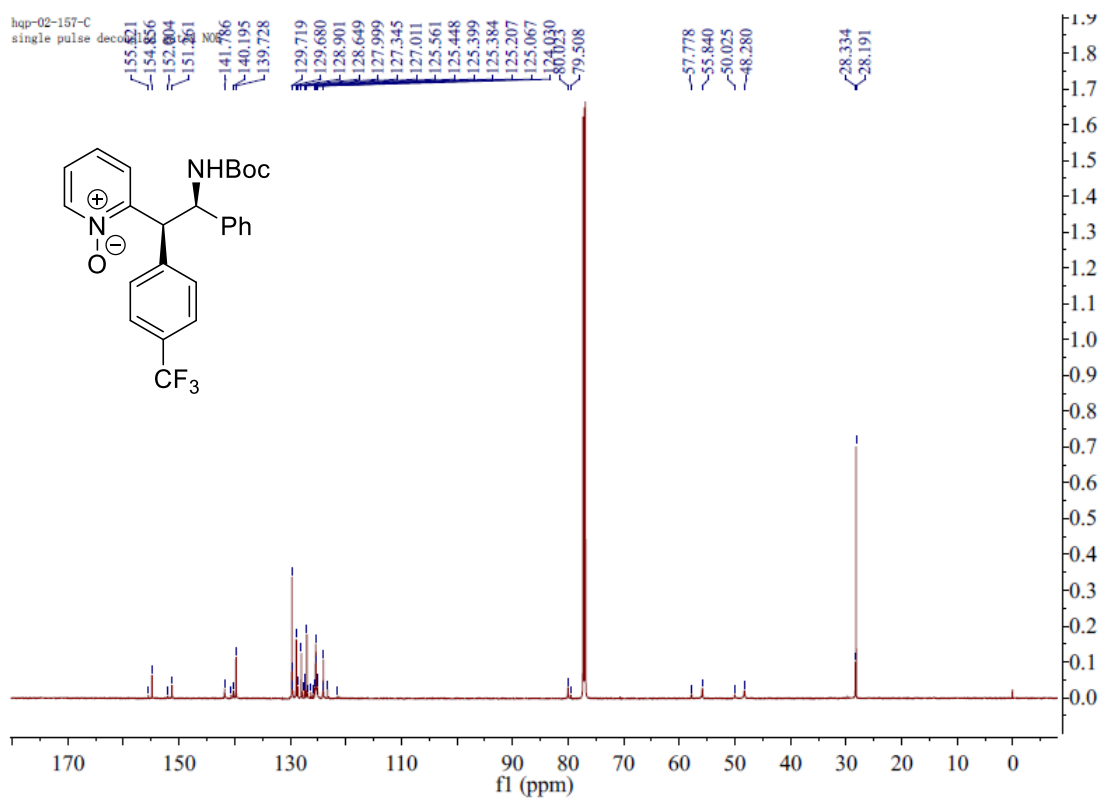

hqp-02-153  
single\_pulse

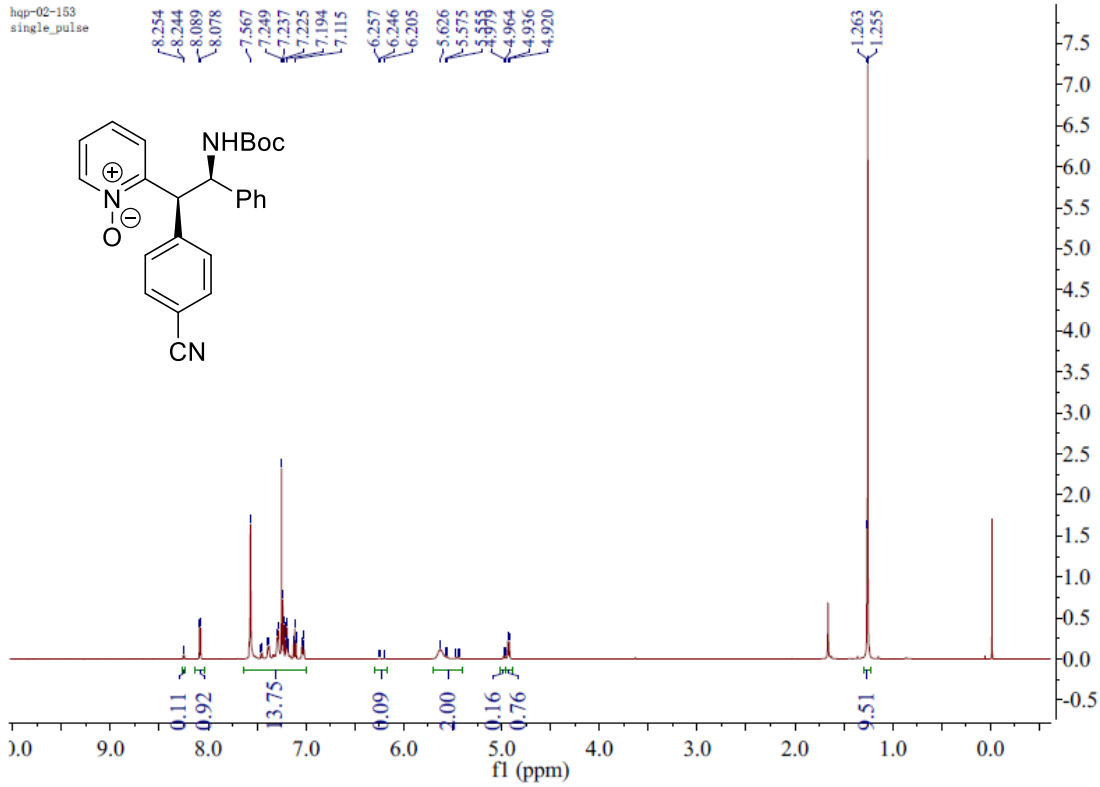

hqp-02-153  
single pulse decoupled

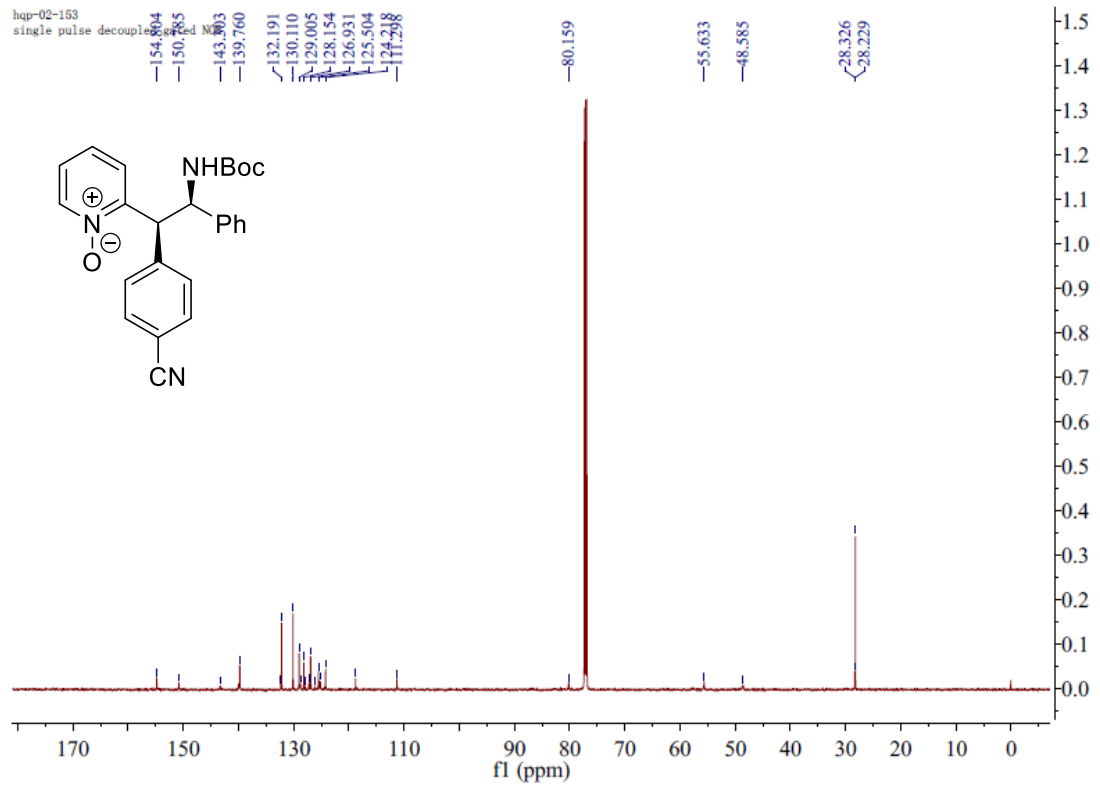

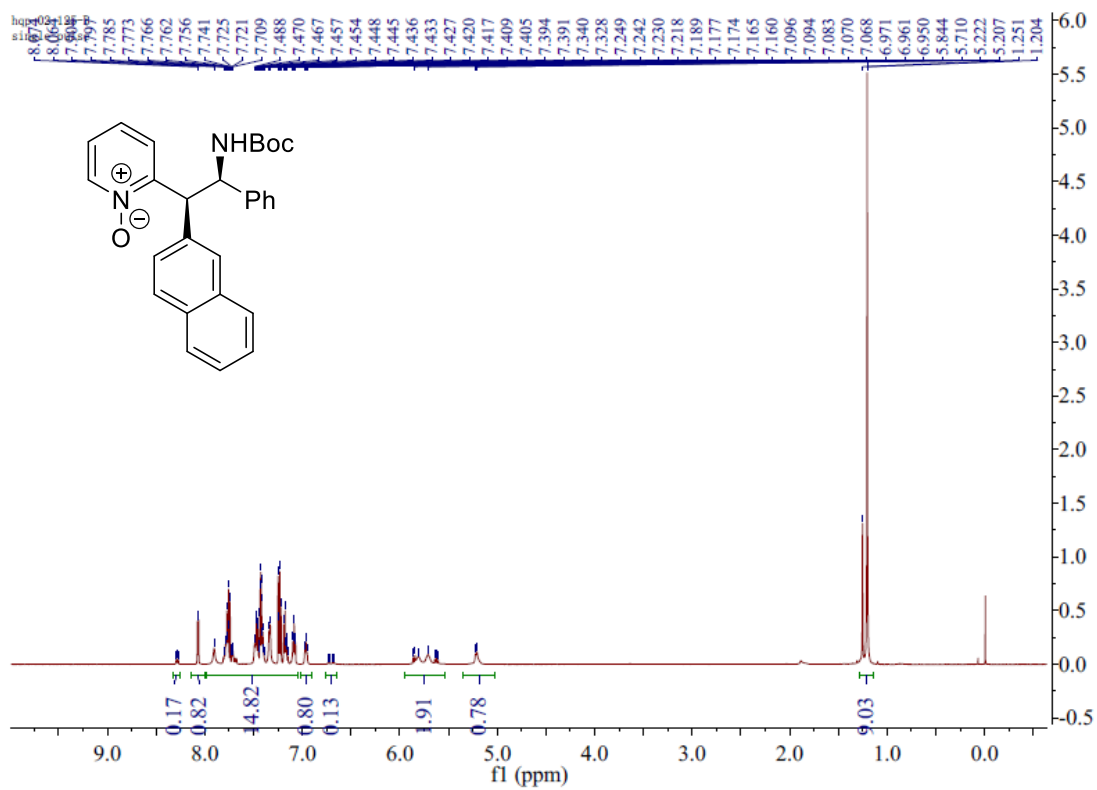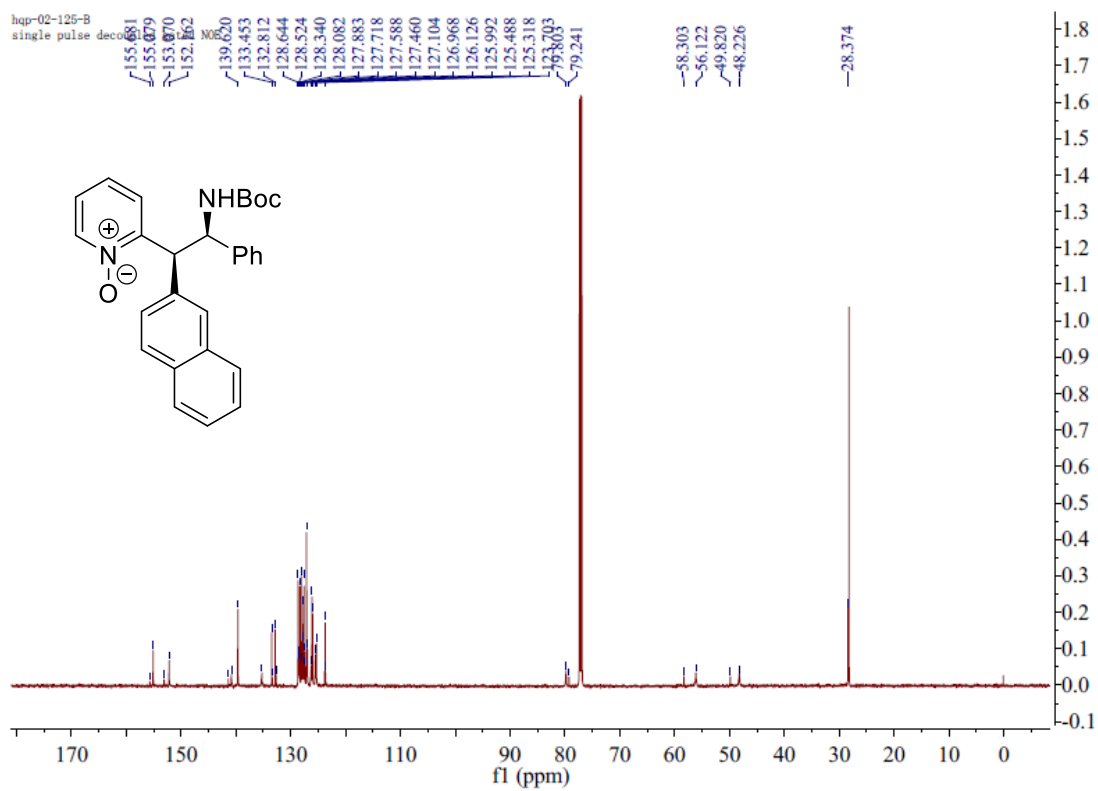

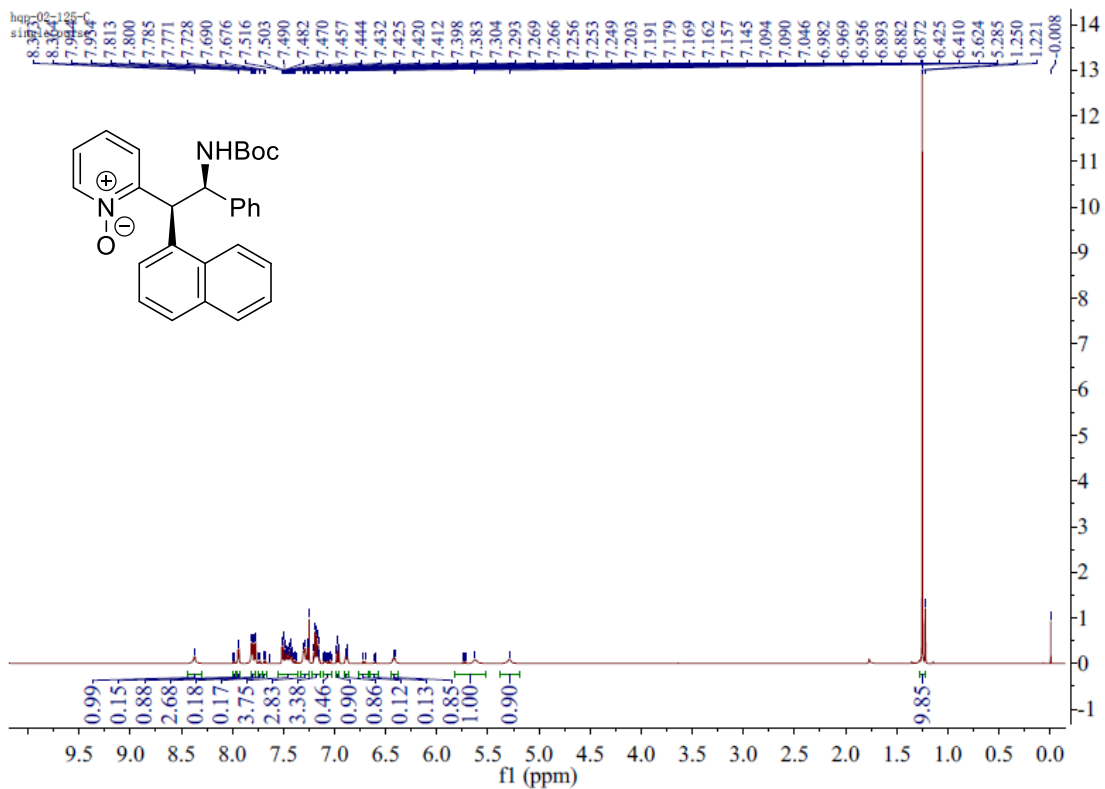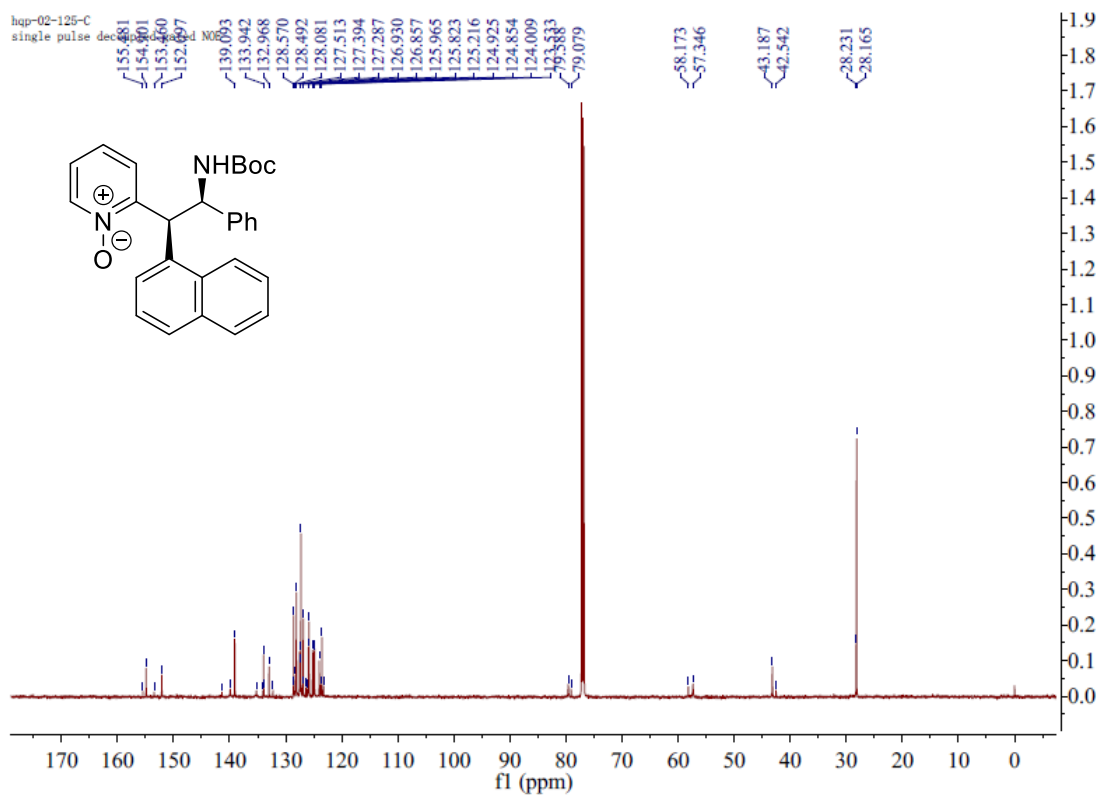

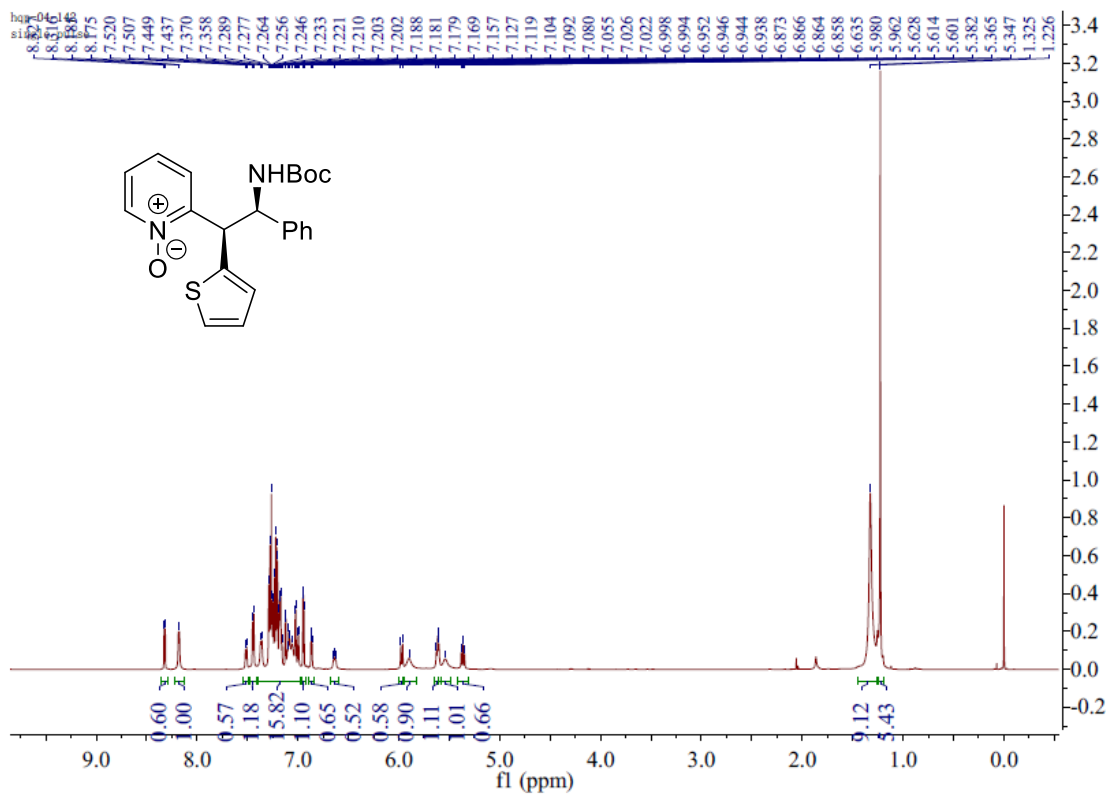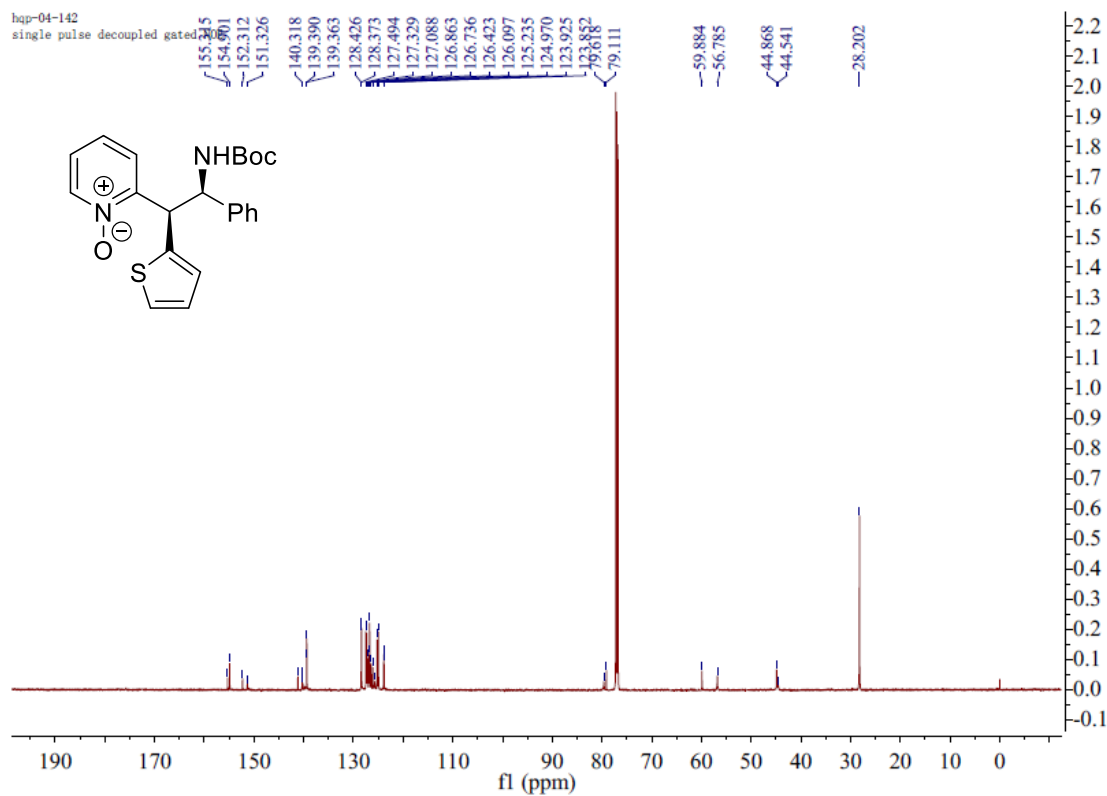

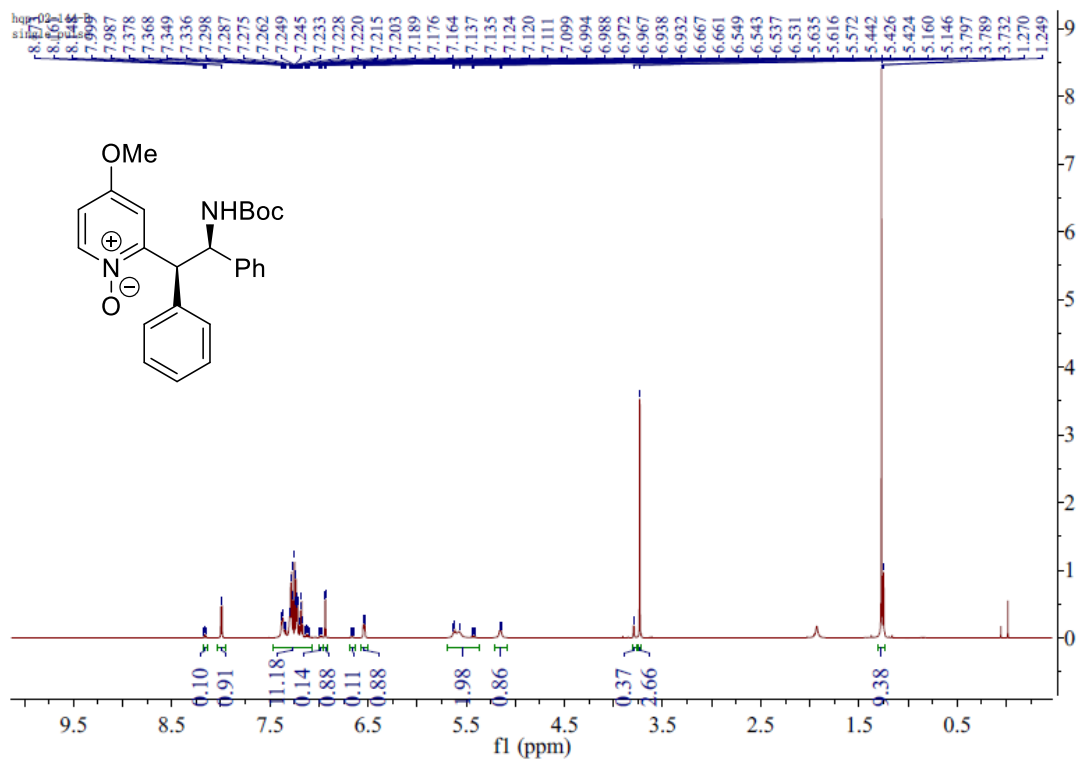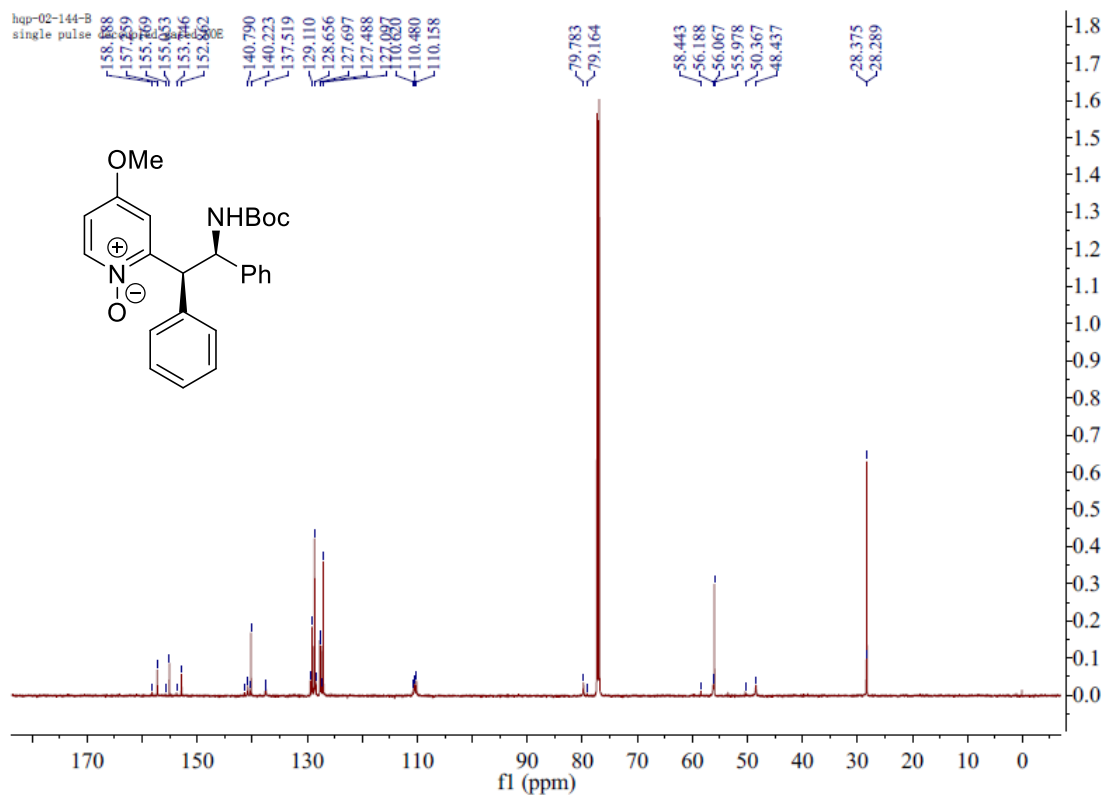

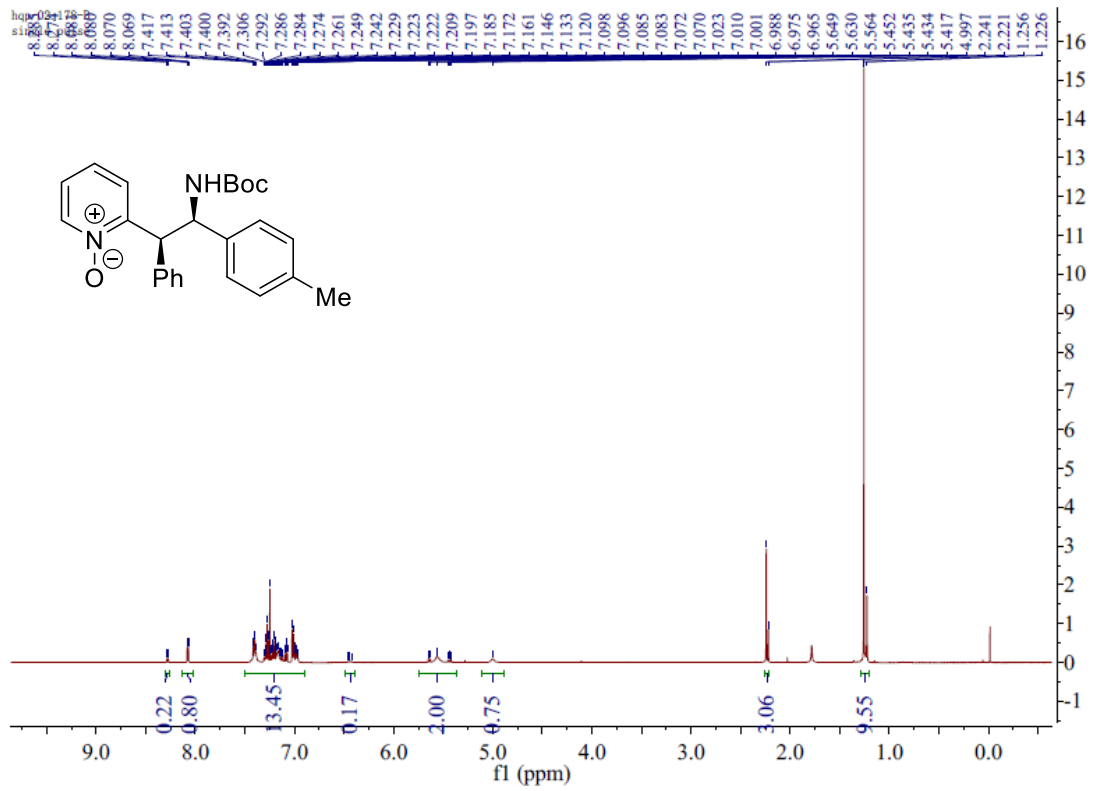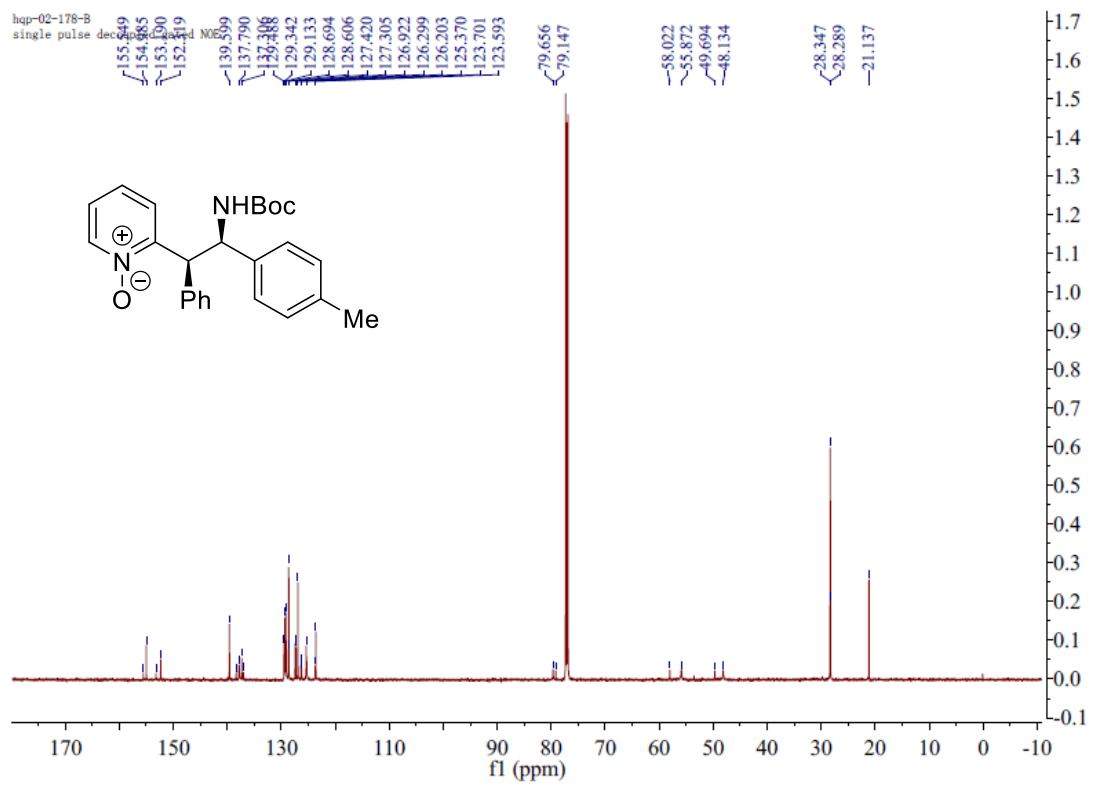

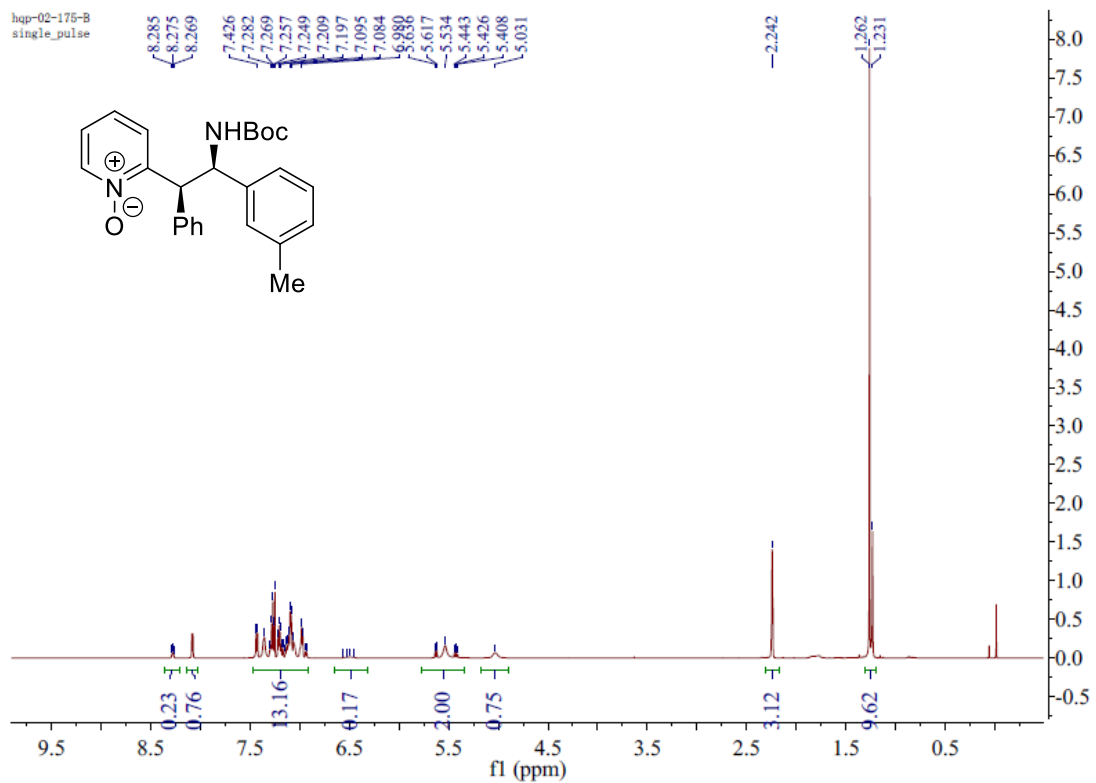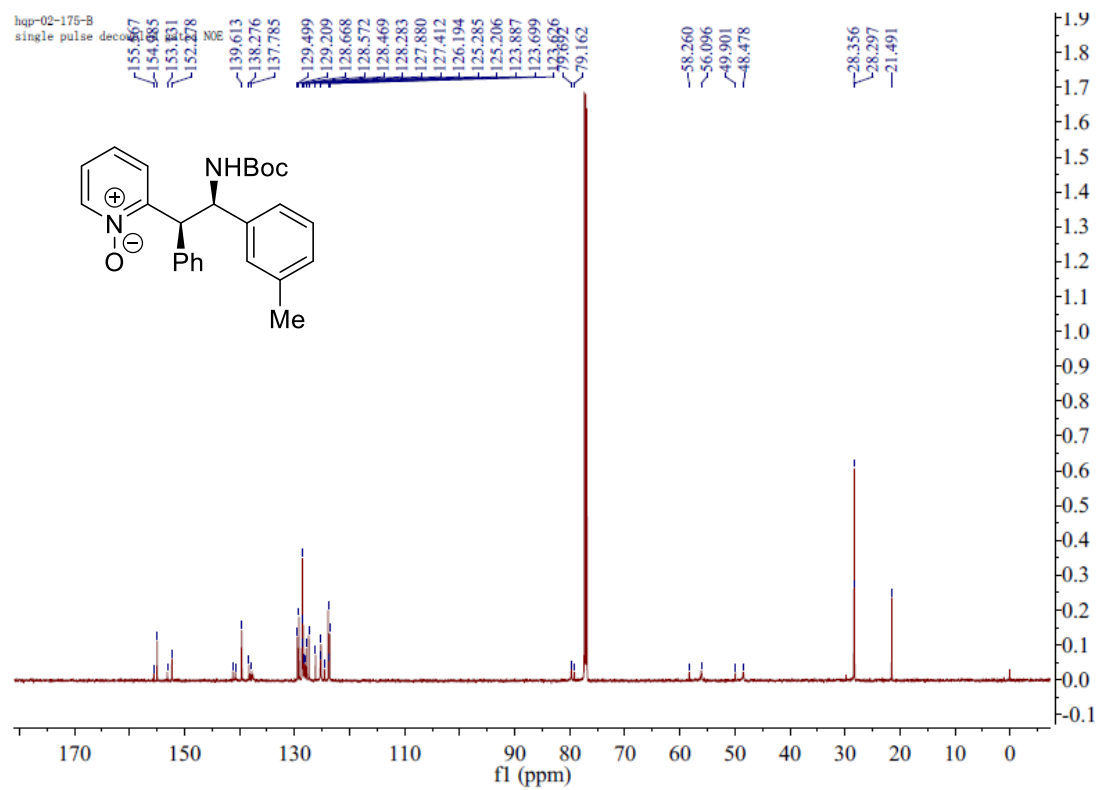



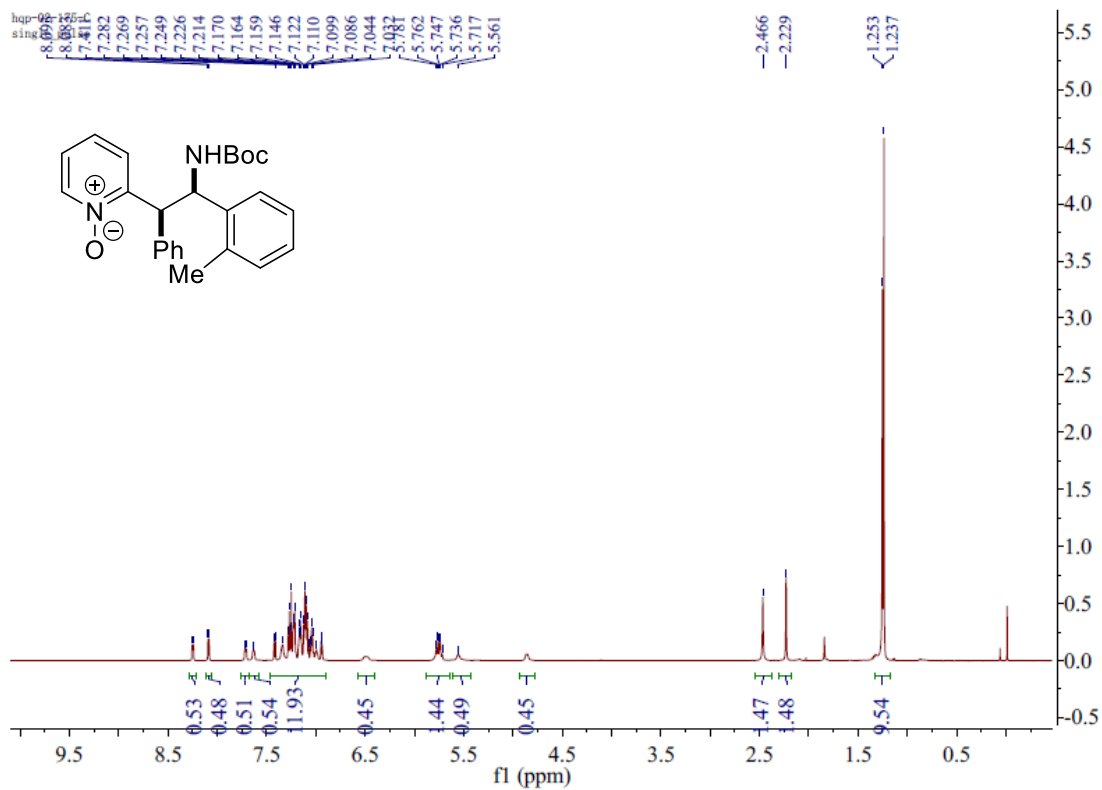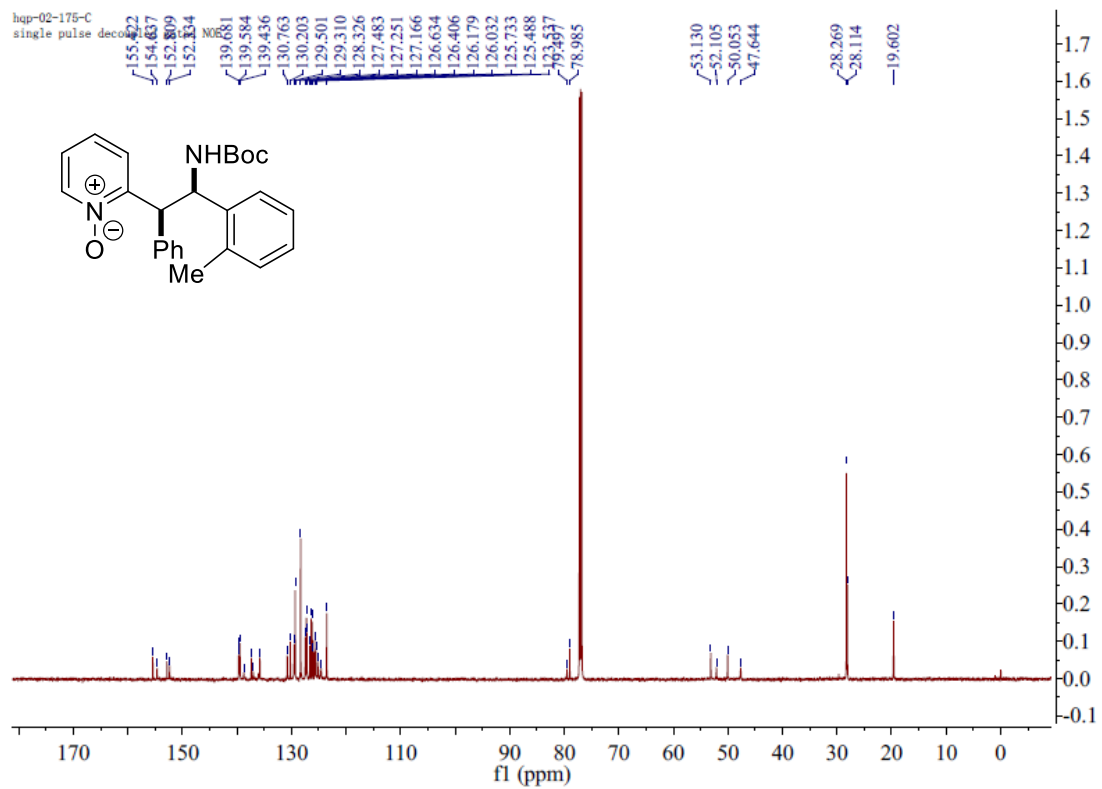

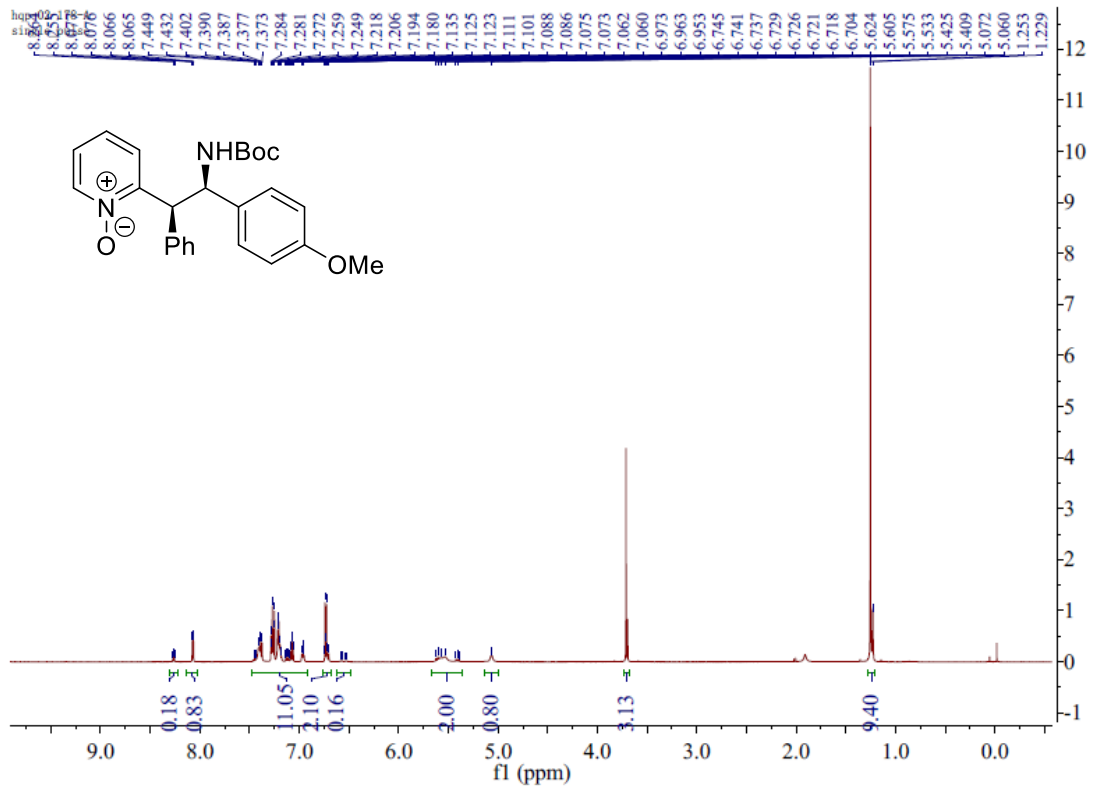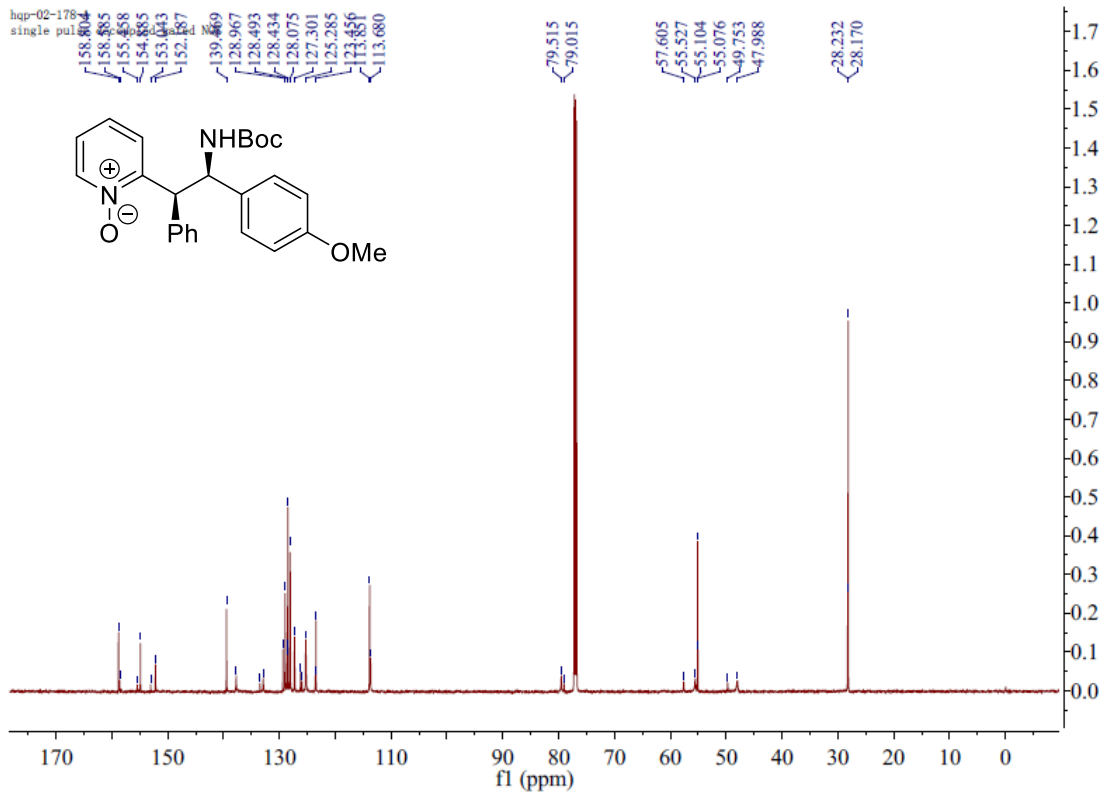

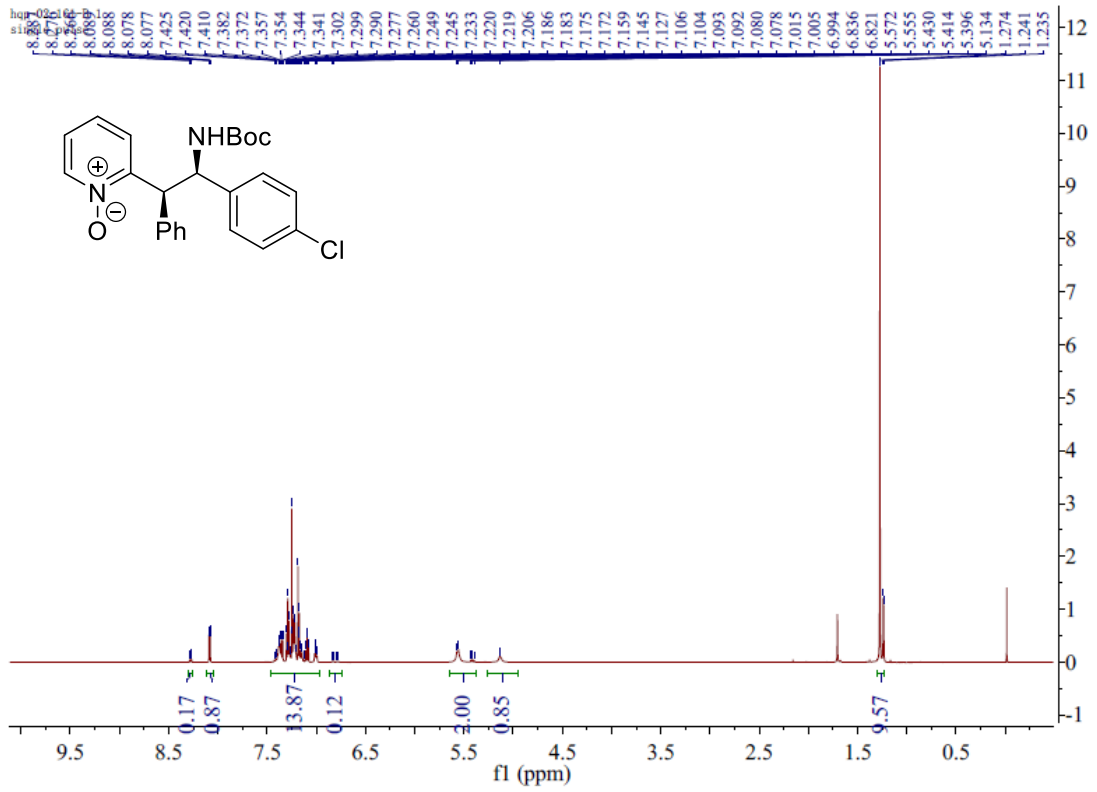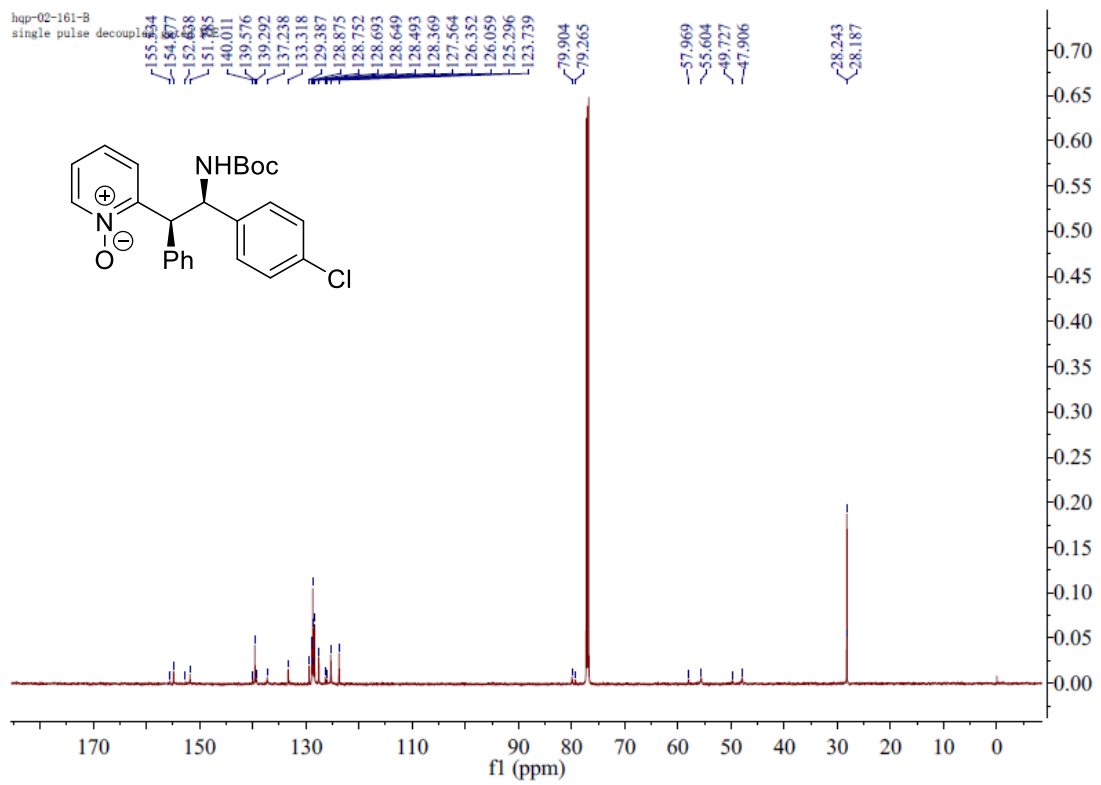

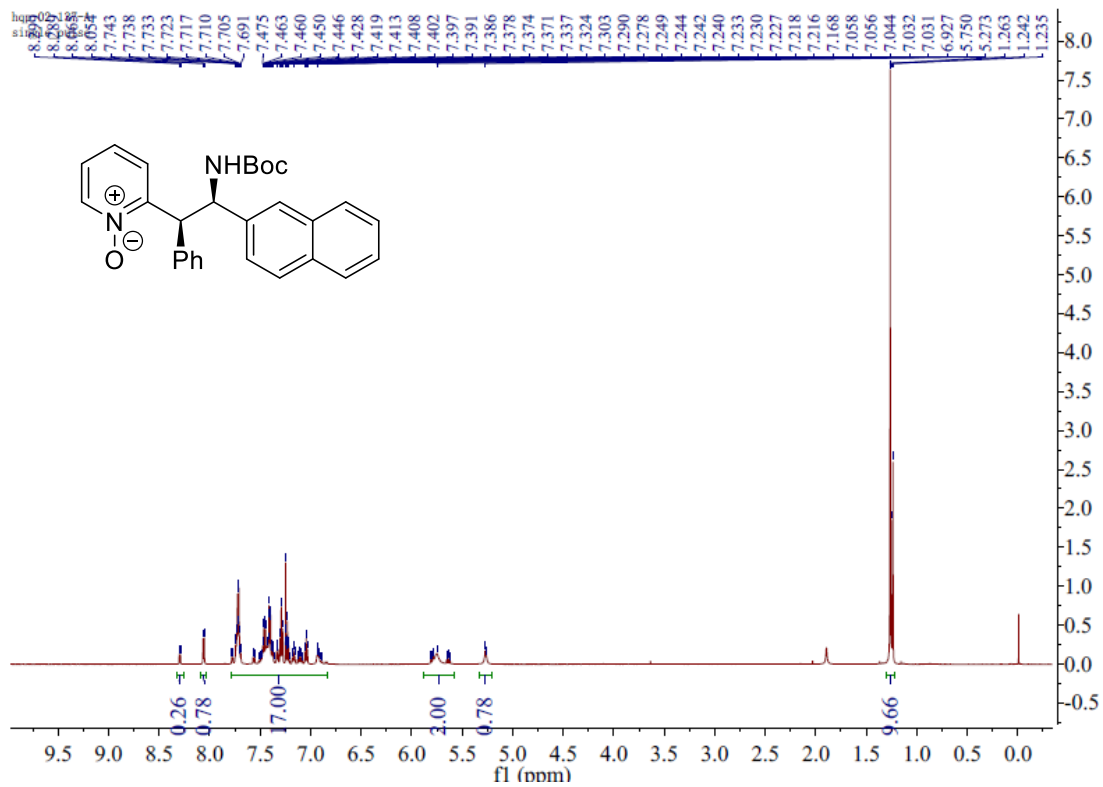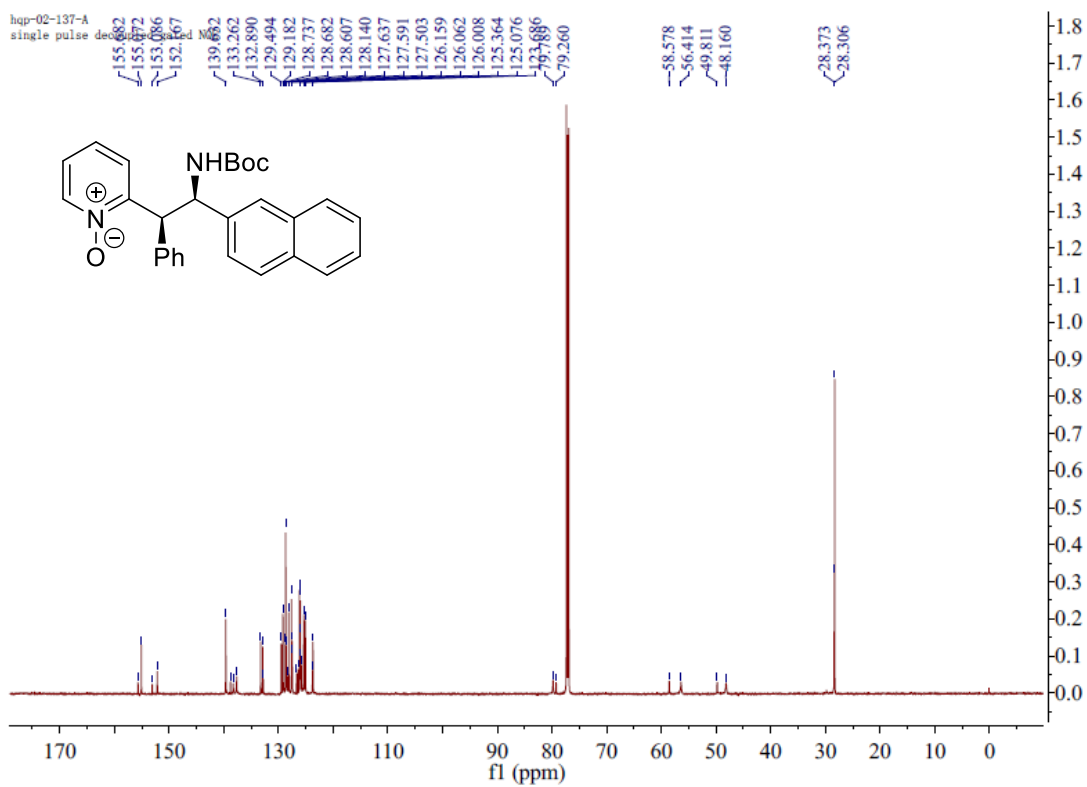

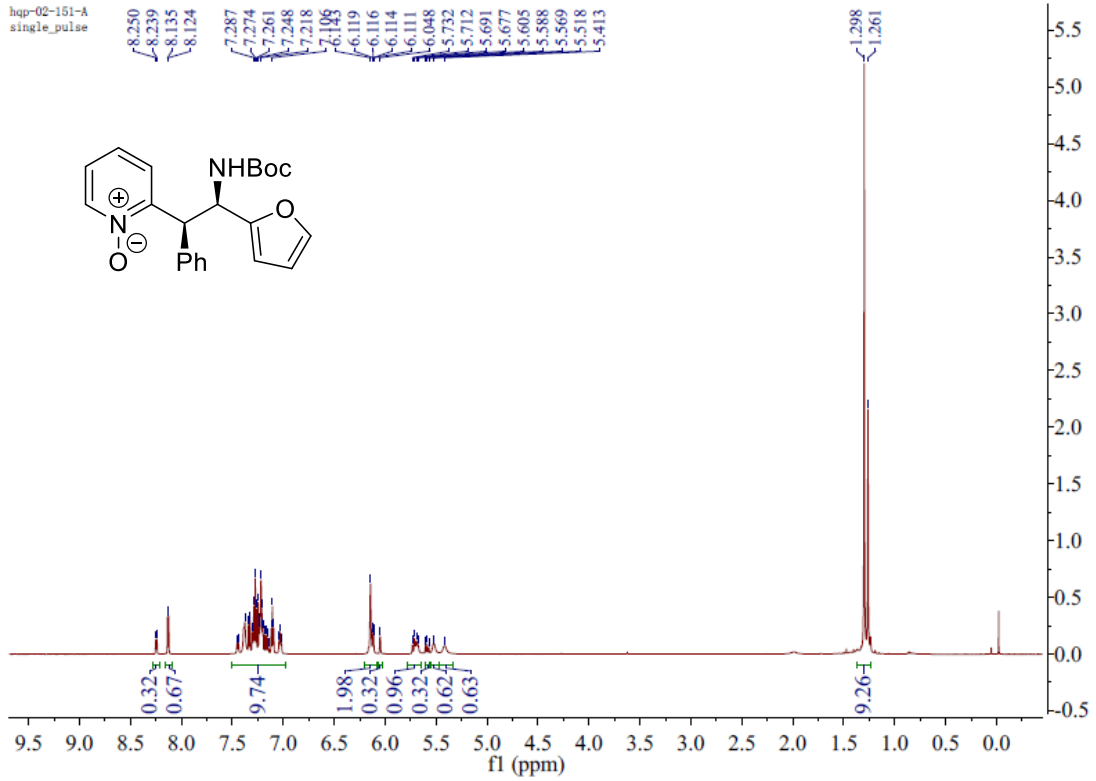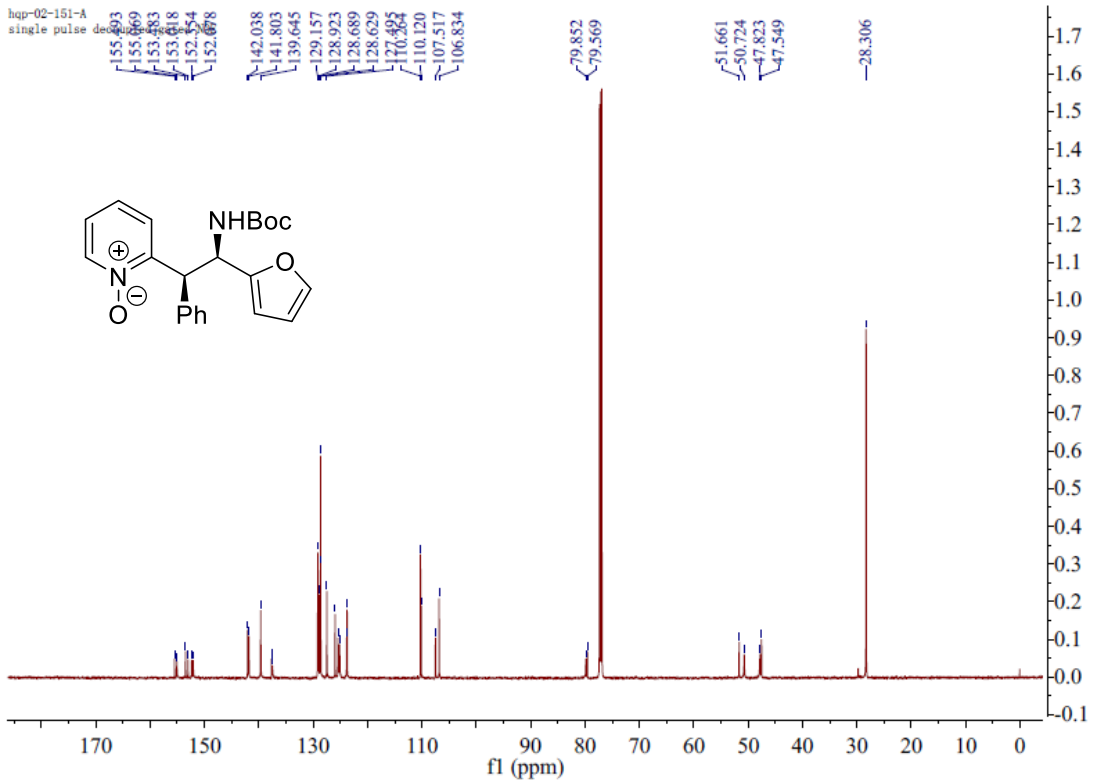

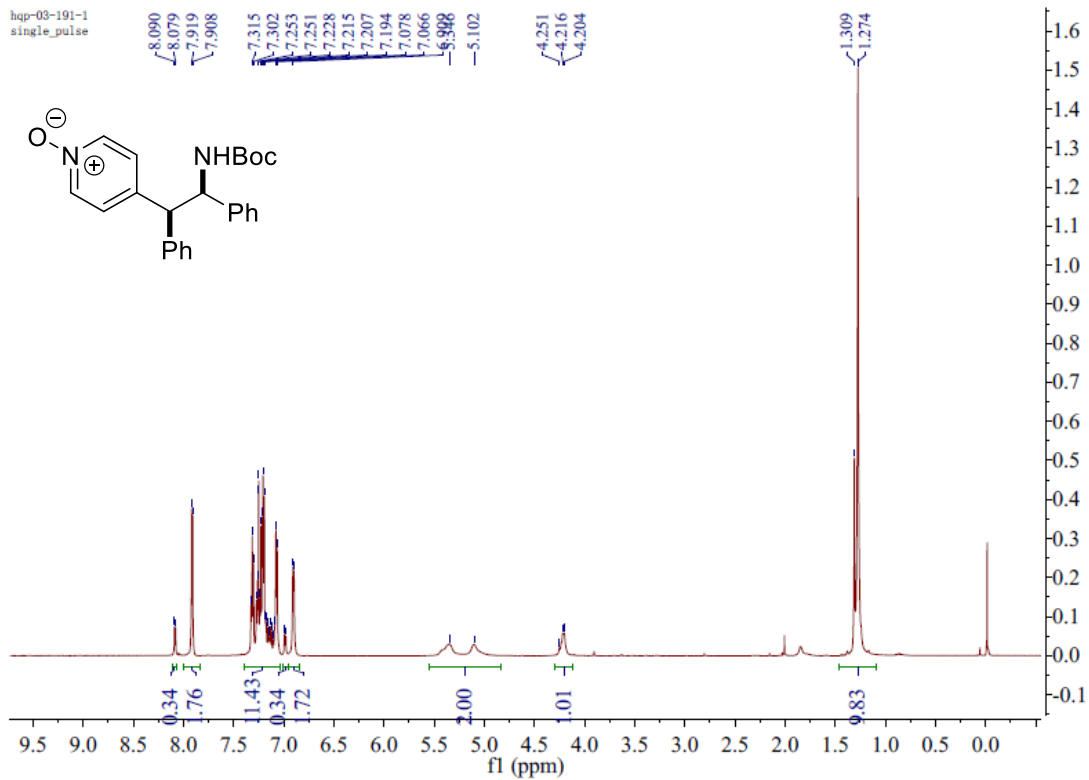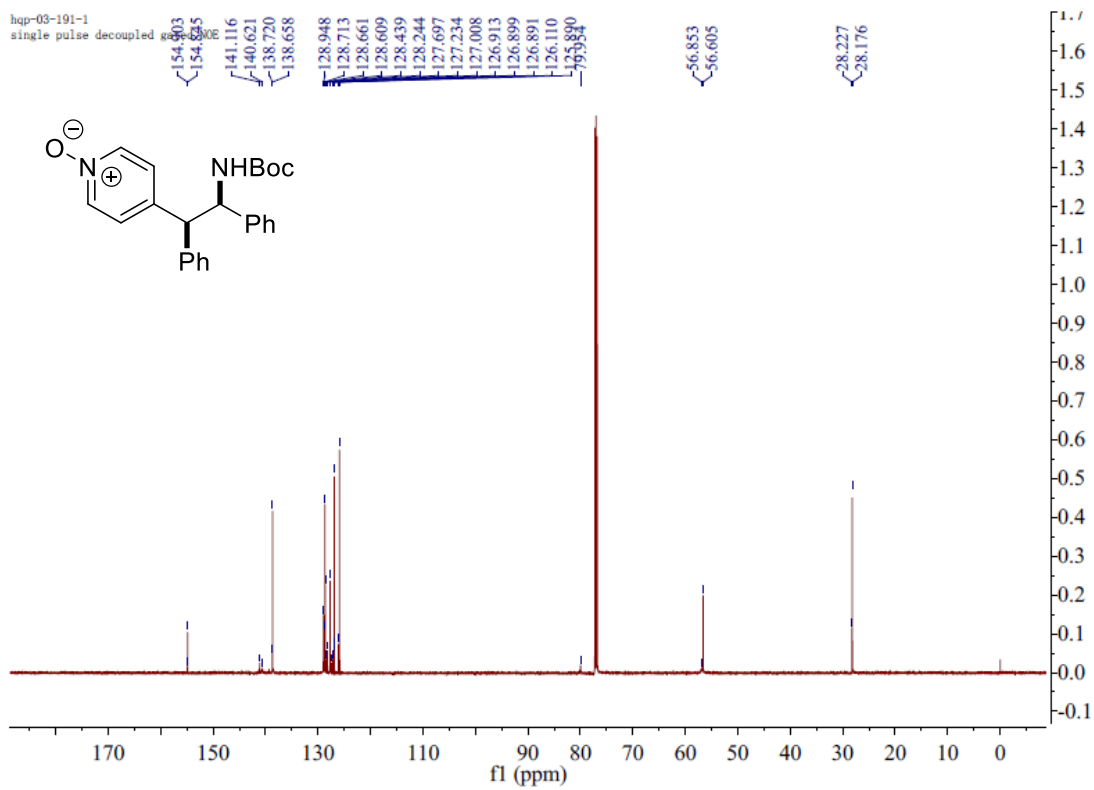

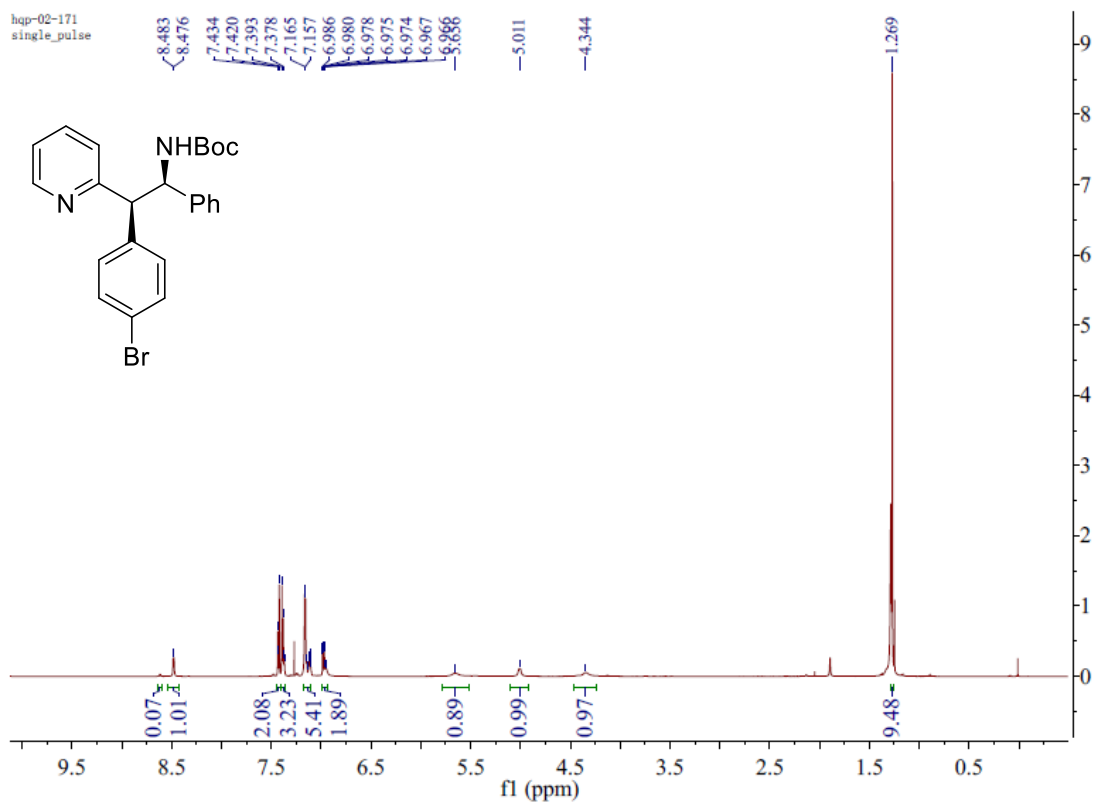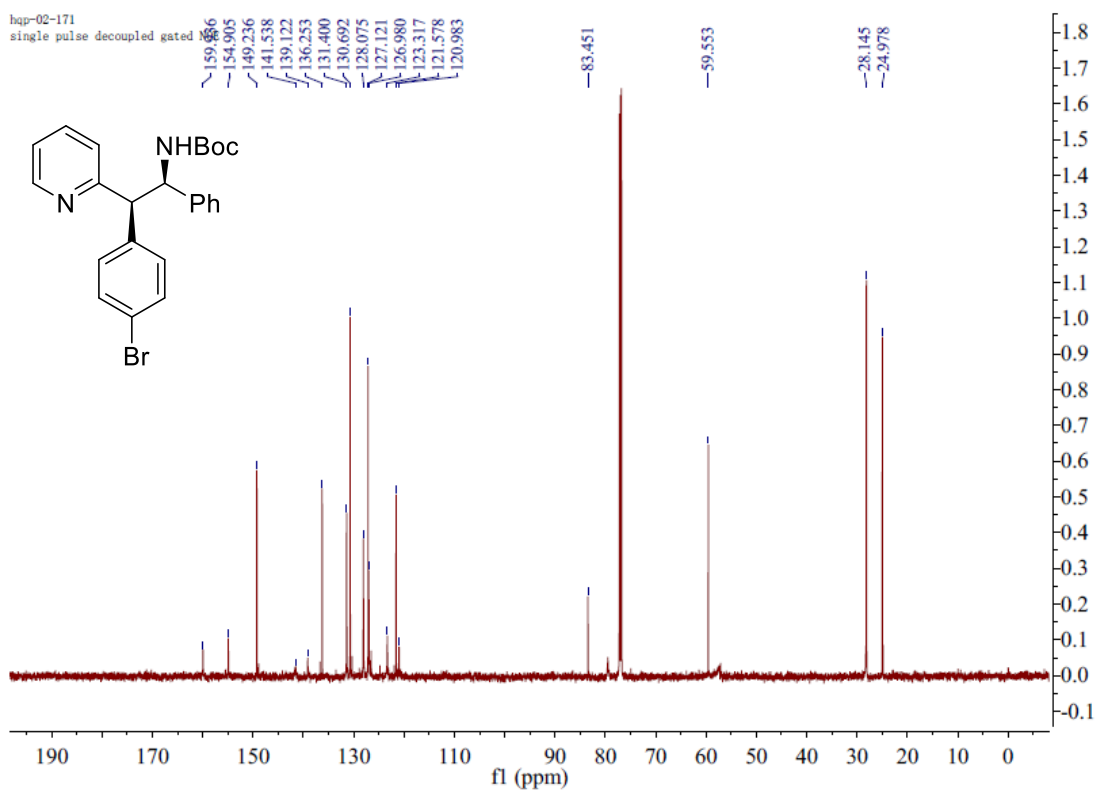

## 9. Referances

- [1] T. Niwa, H. Yorimitsu and K. Oshima, *Angew. Chem. Int. Ed.*, 2007, **46**, 2643-2645.
- [2] W. M. Dean, M. Šiaučiulis, T. E. Storr, W. Lewis and R. A. Stockman, *Angew. Chem. Int. Ed.*, 2016, **55**, 10013-10016.
- [3] H. Ohmiya, H. Yorimitsu and K. Oshima, *Chem. Lett.*, 2004, **33**, 1240-1241.
- [4] R. Shang, Z. Yang, Y. Wang, S. Zhang and L. Liu, *J. Am. Chem. Soc.*, 2010, **132**, 14391-14393.
- [5] W. Jin, P. Zheng, W.-T. Wong, G.-L. Law, *Adv. Synth. Catal.*, 2017, **359**, 1588-1593.
- [6] L. V. Desai, K. J. Stowers and M. S. Sanford, *J. Am. Chem. Soc.*, 2008, **130**, 13285-13293.
- [7] T. Suehiro, T. Niwa, H. Yorimitsu and K. Oshima, *Chem. Asian J.*, 2009, **4**, 1217-1220.
- [8] E. Kianmehr, N. Faghieh and K. M. Khan, *Org. Lett.*, 2015, **17**, 414-417.
- [9] D. J. Schipper, L. Campeau and K. Fagnou, *Tetrahedron*, 2009, **65**, 3155-3164.
